# Supplementary material
Source: Royal Society of Chemistry journal article supplement (doi:10.1039/d6cp01436d)
Supplement: d6cp01436d1.pdf [file d6cp01436d1.pdf]

# Uptake of ammonia by mixed sodium sulfate–bisulfate cluster cations

## Supplementary information

Kevin Li,<sup>[a]</sup> Gabriel Schöpfer,<sup>[b]</sup> Milan Ončák,<sup>[b]</sup> and Jozef Lengyel<sup>[a]\*</sup>

<sup>[a]</sup> *School of Natural Sciences, Technische Universität München, Lichtenbergstr. 4,  
85748 Garching, Germany; E-Mail: jozef.lengyel@tum.de*

<sup>[b]</sup> *Institut für Ionenphysik und Angewandte Physik, Universität Innsbruck,  
Technikerstr. 25, A-6020 Innsbruck, Austria*

Table S1. Product-to-reactant ratio for ammonia uptake by mass-selected mixed sodium sulfate–bisulfate cluster ions at final conversion as a function of NH<sub>3</sub> concentration (0.1, 1, 5, and 10% NH<sub>3</sub> in He buffer gas).

| Cluster ( <i>m/z</i> )                                                                                     | Conversion in % / v/v NH <sub>3</sub> |    |    |          |
|------------------------------------------------------------------------------------------------------------|---------------------------------------|----|----|----------|
| Na <sup>+</sup> [Na <sub>2</sub> SO <sub>4</sub> ][NaHSO <sub>4</sub> ] <sub>2</sub> (404.8)               | 31                                    | 46 | 23 | / 10%    |
|                                                                                                            | 39                                    | 44 | 17 | / 5%     |
|                                                                                                            | 46                                    | 41 | 13 | / 1%     |
|                                                                                                            | 83                                    | 17 | 0  | / 0.1%   |
| Na <sup>+</sup> [Na <sub>2</sub> SO <sub>4</sub> ] <sub>2</sub> [NaHSO <sub>4</sub> ] (426.8)              | 61                                    | 39 | 0  | / 10%    |
|                                                                                                            | 45                                    | 44 | 11 | / 5%     |
|                                                                                                            | 34                                    | 56 | 10 | / 1%     |
|                                                                                                            | 62                                    | 38 | 0  | / 0.1%   |
| Na <sup>+</sup> [Na <sub>2</sub> SO <sub>4</sub> ][NaHSO <sub>4</sub> ] <sub>3</sub> (524.7)               | 61                                    | 39 | 0  | / 10%    |
|                                                                                                            | 56                                    | 44 | 0  | / 5%     |
|                                                                                                            | 58                                    | 35 | 7  | / 1%     |
|                                                                                                            | 88                                    | 12 | 0  | / 0.1%   |
| Na <sup>+</sup> [Na <sub>2</sub> SO <sub>4</sub> ] <sub>2</sub> [NaHSO <sub>4</sub> ] <sub>2</sub> (546.8) | 54                                    | 39 | 7  | / 10%    |
|                                                                                                            | 51                                    | 38 | 11 | / 5%     |
|                                                                                                            | 57                                    | 35 | 8  | / 1%     |
|                                                                                                            | 90                                    | 10 | 0  | / 0.1%   |
| Na <sup>+</sup> [Na <sub>2</sub> SO <sub>4</sub> ] <sub>3</sub> [NaHSO <sub>4</sub> ] (568.7)              | 26                                    | 58 | 16 | / 10%    |
|                                                                                                            | 17                                    | 76 | 7  | / 5%     |
|                                                                                                            | 21                                    | 69 | 10 | / 1%     |
|                                                                                                            | 32                                    | 59 | 9  | / 0.1%   |
| Na <sup>+</sup> [Na <sub>2</sub> SO <sub>4</sub> ][NaHSO <sub>4</sub> ] <sub>4</sub> (644.7)               | 56                                    | 34 | 10 | / 10%    |
|                                                                                                            | 53                                    | 37 | 10 | / 5%     |
|                                                                                                            | 67                                    | 33 | 0  | / 1%     |
|                                                                                                            | 90                                    | 10 | 0  | / 0.1%   |
| Na <sup>+</sup> [Na <sub>2</sub> SO <sub>4</sub> ] <sub>2</sub> [NaHSO <sub>4</sub> ] <sub>3</sub> (666.7) | 52                                    | 33 | 12 | 3 / 10%  |
|                                                                                                            | 73                                    | 22 | 5  | 0 / 5%   |
|                                                                                                            | 71                                    | 25 | 4  | 0 / 1%   |
|                                                                                                            | 95                                    | 5  | 0  | 0 / 0.1% |
| Na <sup>+</sup> [Na <sub>2</sub> SO <sub>4</sub> ] <sub>3</sub> [NaHSO <sub>4</sub> ] <sub>2</sub> (688.7) | 49                                    | 41 | 10 | / 10%    |
|                                                                                                            | 54                                    | 33 | 13 | / 5%     |
|                                                                                                            | 71                                    | 21 | 8  | / 1%     |
|                                                                                                            | 90                                    | 10 | 0  | / 0.1%   |

---

|                                                                                                            |    |    |     |    |    |    |        |
|------------------------------------------------------------------------------------------------------------|----|----|-----|----|----|----|--------|
| Na <sup>+</sup> [Na <sub>2</sub> SO <sub>4</sub> ][NaHSO <sub>4</sub> ] <sub>5</sub> (764.7)               | 0  | 0  | 0   | 16 | 35 | 49 | / 10%  |
|                                                                                                            | 0  | 10 | 6   | 6  | 14 | 64 | / 5%   |
|                                                                                                            | 36 | 42 | 8   | 6  | 0  | 8  | / 1%   |
|                                                                                                            | 76 | 24 | 0   | 0  | 0  | 0  | / 0.1% |
| Na <sup>+</sup> [Na <sub>2</sub> SO <sub>4</sub> ] <sub>2</sub> [NaHSO <sub>4</sub> ] <sub>4</sub> (786.6) | 3  | 0  | 7   | 21 | 69 |    | / 10%  |
|                                                                                                            | 4  | 2  | 0   | 8  | 86 |    | / 5%   |
|                                                                                                            | 8  | 2  | 0   | 2  | 88 |    | / 1%   |
|                                                                                                            | 97 | 3  | 0   | 0  | 0  |    | / 0.1% |
| Na <sup>+</sup> [Na <sub>2</sub> SO <sub>4</sub> ] <sub>3</sub> [NaHSO <sub>4</sub> ] <sub>3</sub> (808.6) | 0  | 0  | 16  | 84 |    |    | / 10%  |
|                                                                                                            | 0  | 0  | 15  | 85 |    |    | / 5%   |
|                                                                                                            | 0  | 0  | 12  | 88 |    |    | / 1%   |
|                                                                                                            | 9  | 0  | 0   | 91 |    |    | / 0.1% |
| Na <sup>+</sup> [Na <sub>2</sub> SO <sub>4</sub> ] <sub>4</sub> [NaHSO <sub>4</sub> ] <sub>2</sub> (830.6) | 9  | 18 | 73  |    |    |    | / 10%  |
|                                                                                                            | 0  | 18 | 82  |    |    |    | / 5%   |
|                                                                                                            | 5  | 13 | 82  |    |    |    | / 1%   |
|                                                                                                            | 9  | 19 | 72  |    |    |    | / 0.1% |
| Na <sup>+</sup> [Na <sub>2</sub> SO <sub>4</sub> ][NaHSO <sub>4</sub> ] <sub>6</sub> (884.6)               | 0  | 0  | 0   | 30 | 46 | 24 | / 10%  |
|                                                                                                            | 0  | 0  | 19  | 21 | 60 | 0  | / 5%   |
|                                                                                                            | 0  | 0  | 38  | 0  | 62 | 0  | / 1%   |
|                                                                                                            | 69 | 31 | 0   | 0  | 0  | 0  | / 0.1% |
| Na <sup>+</sup> [Na <sub>2</sub> SO <sub>4</sub> ] <sub>2</sub> [NaHSO <sub>4</sub> ] <sub>5</sub> (906.6) | 0  | 0  | 17  | 56 | 27 |    | / 10%  |
|                                                                                                            | 5  | 9  | 5   | 37 | 44 |    | / 5%   |
|                                                                                                            | 0  | 0  | 0   | 25 | 75 |    | / 1%   |
|                                                                                                            | 72 | 28 | 0   | 0  | 0  |    | / 0.1% |
| Na <sup>+</sup> [Na <sub>2</sub> SO <sub>4</sub> ] <sub>3</sub> [NaHSO <sub>4</sub> ] <sub>4</sub> (928.6) | 0  | 11 | 43  | 46 |    |    | / 10%  |
|                                                                                                            | 15 | 5  | 19  | 61 |    |    | / 5%   |
|                                                                                                            | 0  | 0  | 17  | 83 |    |    | / 1%   |
|                                                                                                            | 38 | 0  | 18  | 44 |    |    | / 0.1% |
| Na <sup>+</sup> [Na <sub>2</sub> SO <sub>4</sub> ] <sub>4</sub> [NaHSO <sub>4</sub> ] <sub>3</sub> (950.6) | 0  | 30 | 70  |    |    |    | / 10%  |
|                                                                                                            | 6  | 18 | 76  |    |    |    | / 5%   |
|                                                                                                            | 0  | 0  | 100 |    |    |    | / 1%   |
|                                                                                                            | 0  | 23 | 77  |    |    |    | / 1%   |

---

Table S2. Bimolecular rate coefficients (in  $\text{cm}^3 \text{s}^{-1}$ ) for ammonia uptake and the corresponding unimolecular evaporation rate coefficients ( $\text{s}^{-1}$ ) for mass-selected mixed sodium sulfate–bisulfate cluster ions.

| Cluster ( $m/z$ )                                                                                                                                                                                                                                                                                                                                                                                                        | $k_{\text{attachment}}$<br>$\text{cm}^3 \text{s}^{-1}$                                               | $k_{\text{evaporation}}$<br>$\text{s}^{-1}$                                              |
|--------------------------------------------------------------------------------------------------------------------------------------------------------------------------------------------------------------------------------------------------------------------------------------------------------------------------------------------------------------------------------------------------------------------------|------------------------------------------------------------------------------------------------------|------------------------------------------------------------------------------------------|
| $\text{Na}^+[\text{Na}_2\text{SO}_4]_3[\text{NaHSO}_4]$ (568.7)<br>$\text{M}^+ + \text{NH}_3 \rightleftharpoons [\text{M}+\text{NH}_3]^+$                                                                                                                                                                                                                                                                                | 0.05% $\text{NH}_3$<br>$1.4 \times 10^{-10}$                                                         | 0.05% $\text{NH}_3$<br>23                                                                |
| $\text{Na}^+[\text{Na}_2\text{SO}_4]_2[\text{NaHSO}_4]_4$ (786.6)<br>$\text{M}^+ + \text{NH}_3 \rightleftharpoons [\text{M}+\text{NH}_3]^+$<br>$[\text{M}+\text{NH}_3]^+ + \text{NH}_3 \rightleftharpoons [\text{M}+2\text{NH}_3]^+$<br>$[\text{M}+2\text{NH}_3]^+ + \text{NH}_3 \rightleftharpoons [\text{M}+3\text{NH}_3]^+$<br>$[\text{M}+3\text{NH}_3]^+ + \text{NH}_3 \rightleftharpoons [\text{M}+4\text{NH}_3]^+$ | 1% $\text{NH}_3$<br>$3.5 \times 10^{-11}$<br>$k_2 < k_1$<br>$k_3 \gg k_1$<br>$k_4 \gg k_3$           | 1% $\text{NH}_3$<br>130<br>$k_{-2} < k_{-1}$<br>$k_{-3} \gg k_{-1}$<br>$k_{-4} < k_{-1}$ |
|                                                                                                                                                                                                                                                                                                                                                                                                                          | 0.5% $\text{NH}_3$<br>$1.0 \times 10^{-11}$<br>$k_2 \approx k_1$<br>$k_3 > k_2$<br>$k_4 \approx k_3$ | 0.5% $\text{NH}_3$<br>200<br>$k_{-2} < k_{-1}$<br>$k_{-3} < k_{-1}$<br>$k_{-4} < k_{-1}$ |
| $\text{Na}^+[\text{Na}_2\text{SO}_4]_3[\text{NaHSO}_4]_3$ (808.6)<br>$\text{M}^+ + \text{NH}_3 \rightleftharpoons [\text{M}+\text{NH}_3]^+$<br>$[\text{M}+\text{NH}_3]^+ + \text{NH}_3 \rightleftharpoons [\text{M}+2\text{NH}_3]^+$<br>$[\text{M}+2\text{NH}_3]^+ + \text{NH}_3 \rightleftharpoons [\text{M}+3\text{NH}_3]^+$                                                                                           | 0.5% $\text{NH}_3$<br>$1.4 \times 10^{-11}$<br>$k_2 > k_1$<br>$k_3 > k_2$                            | 0.5% $\text{NH}_3$<br>130<br>$k_{-2} \ll k_{-1}$<br>$k_{-3} < k_{-1}$                    |
|                                                                                                                                                                                                                                                                                                                                                                                                                          | 0.1% $\text{NH}_3$<br>$1.6 \times 10^{-10}$<br>$k_2 \approx k_1$<br>$k_3 \approx k_1$                | 0.1% $\text{NH}_3$<br>630<br>$k_{-2} \ll k_{-1}$<br>$k_{-3} \ll k_{-1}$                  |
|                                                                                                                                                                                                                                                                                                                                                                                                                          | 0.05% $\text{NH}_3$<br>$4.5 \times 10^{-12}$<br>$k_2 \gg k_1$<br>$k_3 \gg k_2$                       | 0.05% $\text{NH}_3$<br>4.8<br>$k_{-2} \gg k_{-1}$<br>$k_{-3} \approx k_{-1}$             |
| $\text{Na}^+[\text{Na}_2\text{SO}_4]_4[\text{NaHSO}_4]_2$ (830.6)<br>$\text{M}^+ + \text{NH}_3 \rightleftharpoons [\text{M}+\text{NH}_3]^+$<br>$[\text{M}+\text{NH}_3]^+ + \text{NH}_3 \rightleftharpoons [\text{M}+2\text{NH}_3]^+$                                                                                                                                                                                     | 0.01% $\text{NH}_3$<br>$3.4 \times 10^{-10}$<br>$k_2 > k_1$                                          | 0.01% $\text{NH}_3$<br>170<br>$k_{-2} < k_{-1}$                                          |

|                                                                                                            |                                  |                                    |
|------------------------------------------------------------------------------------------------------------|----------------------------------|------------------------------------|
| Na <sup>+</sup> [Na <sub>2</sub> SO <sub>4</sub> ] <sub>2</sub> [NaHSO <sub>4</sub> ] <sub>5</sub> (906.6) | 0.5% NH <sub>3</sub>             | 0.5% NH <sub>3</sub>               |
| M <sup>+</sup> + NH <sub>3</sub> ⇌ [M+NH <sub>3</sub> ] <sup>+</sup>                                       | 6.8 × 10 <sup>-11</sup>          | 25                                 |
| [M+NH <sub>3</sub> ] <sup>+</sup> + NH <sub>3</sub> ⇌ [M+2NH <sub>3</sub> ] <sup>+</sup>                   | k <sub>2</sub> >> k <sub>1</sub> | k <sub>-2</sub> >> k <sub>-1</sub> |
| [M+2NH <sub>3</sub> ] <sup>+</sup> + NH <sub>3</sub> ⇌ [M+3NH <sub>3</sub> ] <sup>+</sup>                  | k <sub>3</sub> > k <sub>1</sub>  | k <sub>-3</sub> ≈ k <sub>-1</sub>  |
| [M+3NH <sub>3</sub> ] <sup>+</sup> + NH <sub>3</sub> ⇌ [M+4NH <sub>3</sub> ] <sup>+</sup>                  | k <sub>4</sub> > k <sub>2</sub>  | k <sub>-4</sub> >> k <sub>-1</sub> |
| Na <sup>+</sup> [Na <sub>2</sub> SO <sub>4</sub> ] <sub>3</sub> [NaHSO <sub>4</sub> ] <sub>4</sub> (928.6) | 0.5% NH <sub>3</sub>             | 0.5% NH <sub>3</sub>               |
| M <sup>+</sup> + NH <sub>3</sub> ⇌ [M+NH <sub>3</sub> ] <sup>+</sup>                                       | 3.6 × 10 <sup>-11</sup>          | ~0                                 |
| [M+NH <sub>3</sub> ] <sup>+</sup> + NH <sub>3</sub> ⇌ [M+2NH <sub>3</sub> ] <sup>+</sup>                   | k <sub>2</sub> >> k <sub>1</sub> | k <sub>-2</sub> ≈ k <sub>-1</sub>  |
| [M+2NH <sub>3</sub> ] <sup>+</sup> + NH <sub>3</sub> ⇌ [M+3NH <sub>3</sub> ] <sup>+</sup>                  | k <sub>3</sub> >> k <sub>1</sub> | k <sub>-3</sub> ≈ k <sub>-1</sub>  |
|                                                                                                            | 0.1% NH <sub>3</sub>             | 0.1% NH <sub>3</sub>               |
|                                                                                                            | 1.8 × 10 <sup>-10</sup>          | 20                                 |
|                                                                                                            | k <sub>2</sub> ≈ k <sub>1</sub>  | k <sub>-2</sub> ≈ k <sub>-1</sub>  |
|                                                                                                            | k <sub>3</sub> ≈ k <sub>1</sub>  | k <sub>-3</sub> ≈ k <sub>-1</sub>  |
|                                                                                                            | 0.05% NH <sub>3</sub>            | 0.05% NH <sub>3</sub>              |
|                                                                                                            | 5.1 × 10 <sup>-11</sup>          | 180                                |
|                                                                                                            | k <sub>2</sub> >> k <sub>1</sub> | k <sub>-2</sub> > k <sub>-1</sub>  |
|                                                                                                            | k <sub>3</sub> > k <sub>1</sub>  | k <sub>-3</sub> < k <sub>-1</sub>  |
| Na <sup>+</sup> [Na <sub>2</sub> SO <sub>4</sub> ] <sub>4</sub> [NaHSO <sub>4</sub> ] <sub>3</sub> (950.6) | 0.01% NH <sub>3</sub>            | 0.01% NH <sub>3</sub>              |
| M <sup>+</sup> + NH <sub>3</sub> ⇌ [M+NH <sub>3</sub> ] <sup>+</sup>                                       | 5.7 × 10 <sup>-10</sup>          | 67                                 |
| [M+NH <sub>3</sub> ] <sup>+</sup> + NH <sub>3</sub> ⇌ [M+2NH <sub>3</sub> ] <sup>+</sup>                   | k <sub>2</sub> >> k <sub>1</sub> | k <sub>-2</sub> >> k <sub>-1</sub> |

Table S3. Calculated standard Gibbs energies (in kcal/mol) for adsorption of ammonia molecules on  $\text{Na}^+[\text{Na}_2\text{SO}_4]_m[\text{NaHSO}_4]_n$  clusters as calculated using different methods. For all methods but r2SCAN-3c, the def2TZVP basis set was used. Mean absolute errors are provided with respect to the values calculated through r2SCAN-3c. Global minimum structures were selected based on energies from r2SCAN-3c and directly reoptimized with the respective methods.

| $m$                 | $n$ | #(NH <sub>3</sub> ) | r2SCAN-3c | B3PW91 | $\omega$ B97X-D4 | B3LYP | B3PW91-D4 | B3LYP-D4 | CAMB3LYP-D4 |
|---------------------|-----|---------------------|-----------|--------|------------------|-------|-----------|----------|-------------|
| 1                   | 1   | 1                   | -10.3     | -9.8   | -12.1            | -11.0 | -10.8     | -12.0    | -12.7       |
| 1                   | 1   | 2                   | -8.2      | -8.2   | -9.3             | -8.3  | -10.3     | -10.1    | -10.9       |
| 1                   | 2   | 1                   | -7.1      | -7.3   | -8.5             | -8.3  | -8.3      | -10.0    | -10.0       |
| 1                   | 2   | 2                   | -8.0      | -7.2   | -9.2             | -8.4  | -8.9      | -8.3     | -10.3       |
| 1                   | 3   | 1                   | -8.0      | -7.3   | -8.9             | -8.3  | -8.7      | -9.8     | -10.2       |
| 1                   | 3   | 2                   | -7.1      | -7.0   | -8.5             | -7.2  | -8.9      | -8.7     | -9.5        |
| 1                   | 3   | 3                   | -6.8      | -6.0   | -8.1             | -6.9  | -6.8      | -8.1     | -8.7        |
| 1                   | 4   | 1                   | -8.2      | -3.5   | -10.4            | -3.6  | -7.9      | -8.3     | -8.5        |
| 1                   | 4   | 2                   | -7.1      | -6.4   | -8.5             | -7.4  | -7.7      | -8.4     | -8.9        |
| 1                   | 4   | 3                   | -10.5     | -2.7   | -9.4             | -3.4  | -12.1     | -12.5    | -15.8       |
| 1                   | 4   | 4                   | -6.6      | -4.9   | -7.7             | -6.0  | -7.2      | -8.2     | -8.7        |
| 2                   | 1   | 1                   | -9.4      | -9.0   | -11.0            | -10.8 | -9.8      | -13.2    | -11.2       |
| 2                   | 1   | 2                   | -7.1      | -6.4   | -8.7             | -7.0  | -7.5      | -5.8     | -9.9        |
| 2                   | 2   | 1                   | -7.5      | -6.7   | -6.6             | -7.6  | -6.4      | -7.4     | -8.8        |
| 2                   | 2   | 2                   | -10.3     | -3.2   | -7.9             | -1.2  | -10.7     | -8.2     | -9.4        |
| 2                   | 3   | 1                   | -12.2     | -9.1   | -15.0            | -8.4  | -15.2     | -14.4    | -17.2       |
| 2                   | 3   | 2                   | -9.1      | -7.5   | -11.0            | -9.2  | -10.5     | -11.3    | -13.0       |
| 2                   | 3   | 3                   | -9.4      | -5.1   | -8.5             | -6.1  | -7.8      | -8.9     | -10.6       |
| 2                   | 4   | 1                   | -6.6      | -4.9   | -7.2             | -5.3  | -6.3      | -6.9     | -7.9        |
| 2                   | 4   | 2                   | -7.3      | -3.7   | -10.0            | -2.4  | -13.7     | -11.8    | -13.5       |
| 2                   | 4   | 3                   | -11.4     | -11.2  | -15.7            | -12.5 | -13.8     | -14.6    | -14.2       |
| 2                   | 4   | 4                   | -15.6     | -7.2   | -13.8            | -8.4  | -14.3     | -15.2    | -18.4       |
| 3                   | 1   | 1                   | -12.8     | -9.7   | -15.2            | -10.1 | -12.9     | -12.7    | -15.7       |
| 3                   | 1   | 2                   | -6.1      | -5.0   | -7.2             | -5.6  | -6.2      | -7.1     | -7.7        |
| 3                   | 2   | 1                   | -9.0      | -6.8   | -7.5             | -8.1  | -8.2      | -9.5     | -11.1       |
| 3                   | 2   | 2                   | -8.5      | -1.6   | -8.3             | -2.2  | -9.6      | -9.9     | -11.8       |
| 3                   | 3   | 1                   | -11.3     | -8.3   | -13.6            | -7.3  | -14.7     | -14.5    | -15.3       |
| 3                   | 3   | 2                   | -8.7      | -8.5   | -12.5            | -10.0 | -11.5     | -11.8    | -11.5       |
| 3                   | 3   | 3                   | -11.2     | -5.7   | -11.9            | -7.7  | -11.0     | -12.7    | -14.7       |
| 3                   | 4   | 1                   | -9.6      | -6.6   | -7.6             | -7.2  | -8.5      | -8.4     | -10.0       |
| 3                   | 4   | 2                   | -10.8     | -8.0   | -12.6            | -8.6  | -11.7     | -12.3    | -13.4       |
| 3                   | 4   | 3                   | -5.9      | 1.8    | -7.3             | 0.5   | -7.6      | -8.4     | -10.1       |
| 3                   | 4   | 4                   | -7.9      | -7.9   | -9.7             | -7.6  | -11.0     | -10.9    | -11.9       |
| Mean absolute error |     |                     |           | 2.6    | 1.7              | 2.4   | 1.3       | 1.7      | 2.6         |

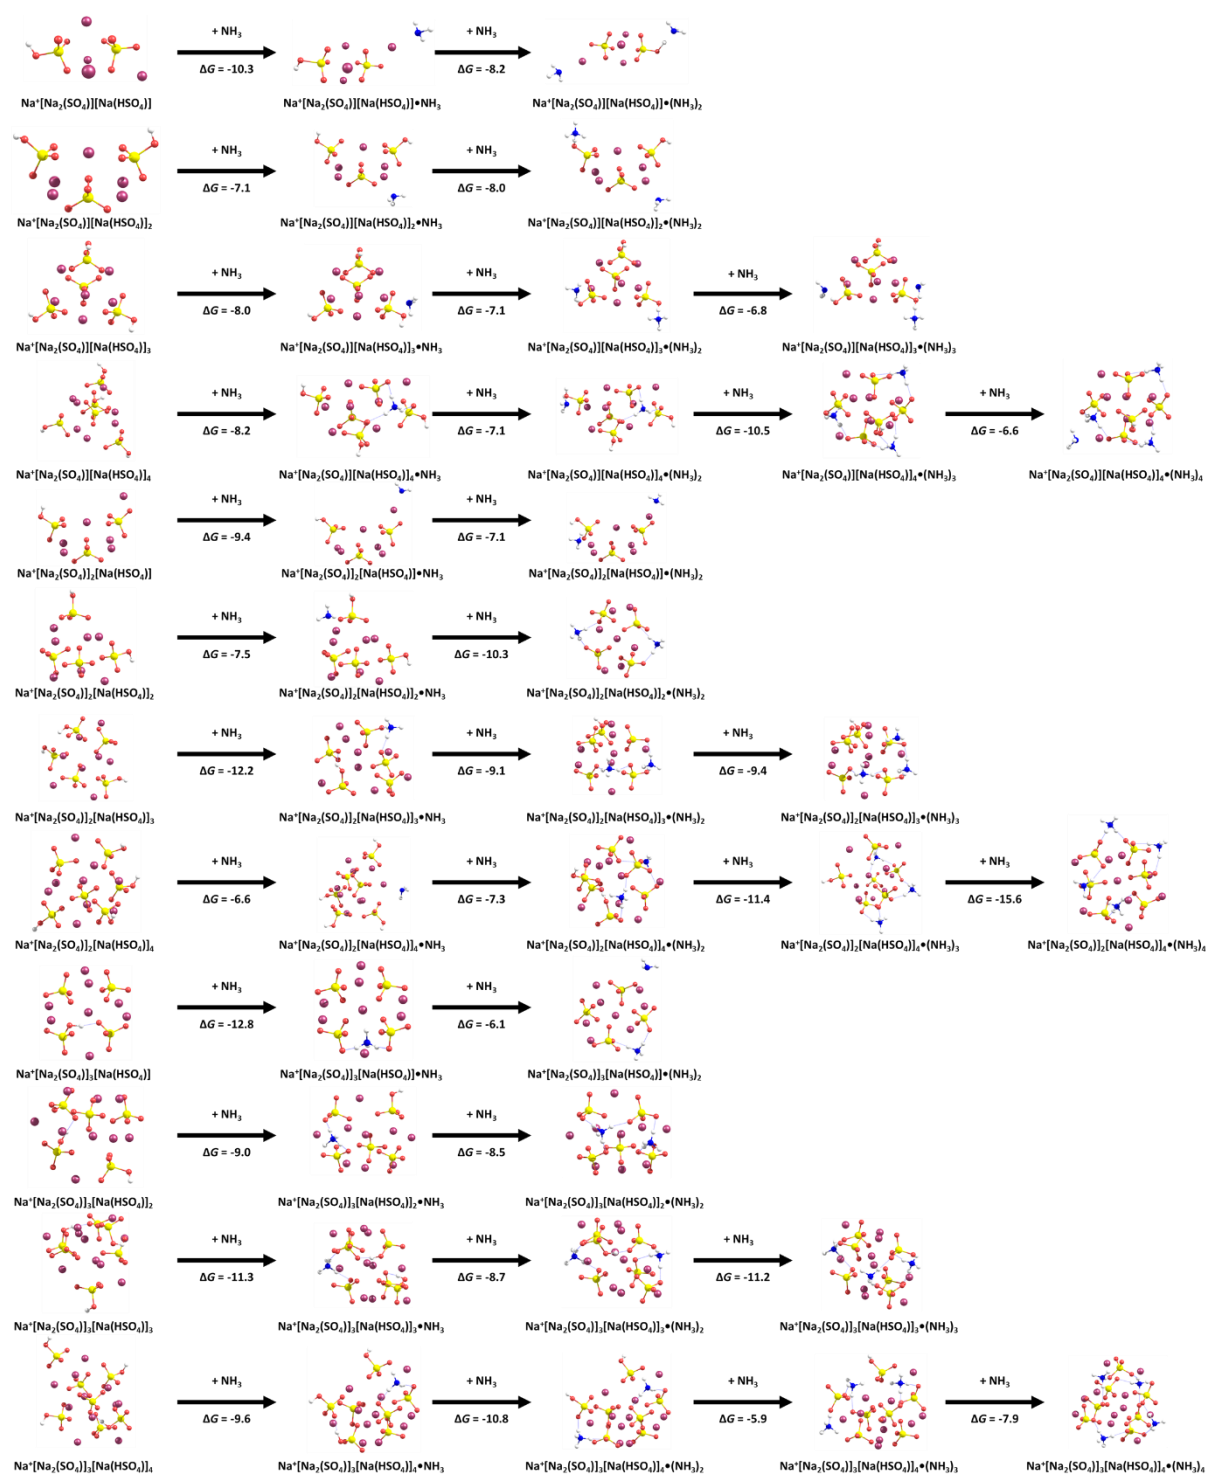

Figure S1. The most stable structures obtained through quantum chemical calculations, along with the respective Gibbs energy values for  $\text{NH}_3$  adsorption in kcal/mol.

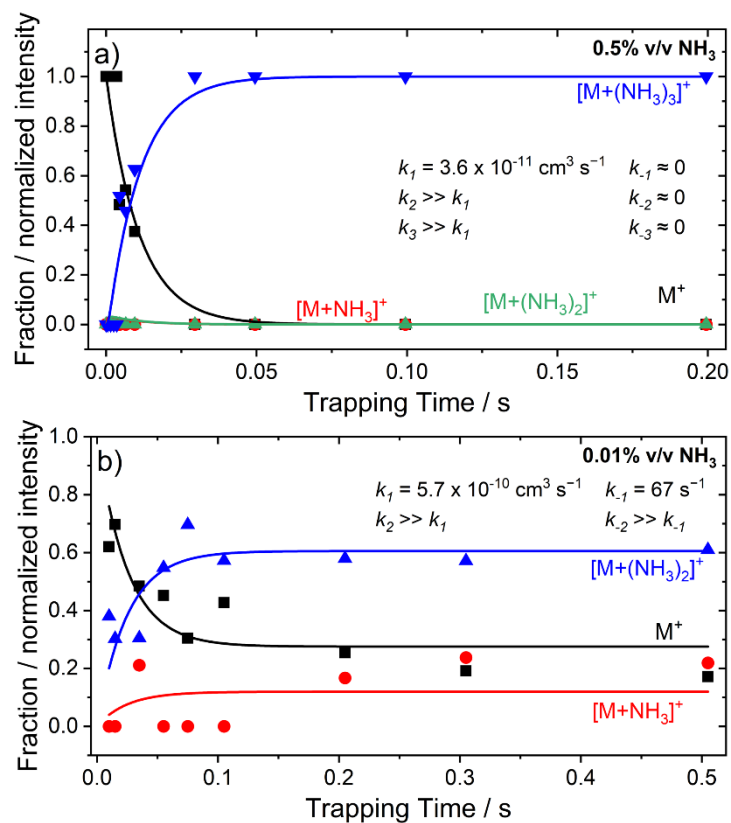

Figure S2. Kinetic measurements of ammonia uptake by mixed sulfate–bisulfate cluster ions: (a) Na<sup>+</sup>[Na<sub>2</sub>(SO<sub>4</sub>)<sub>3</sub>][Na(HSO<sub>4</sub>)<sub>4</sub>]<sub>4</sub>; and (b) Na<sup>+</sup>[Na<sub>2</sub>(SO<sub>4</sub>)<sub>4</sub>][Na(HSO<sub>4</sub>)<sub>3</sub>]<sub>3</sub>. The kinetic model assumes reversible NH<sub>3</sub> uptake.

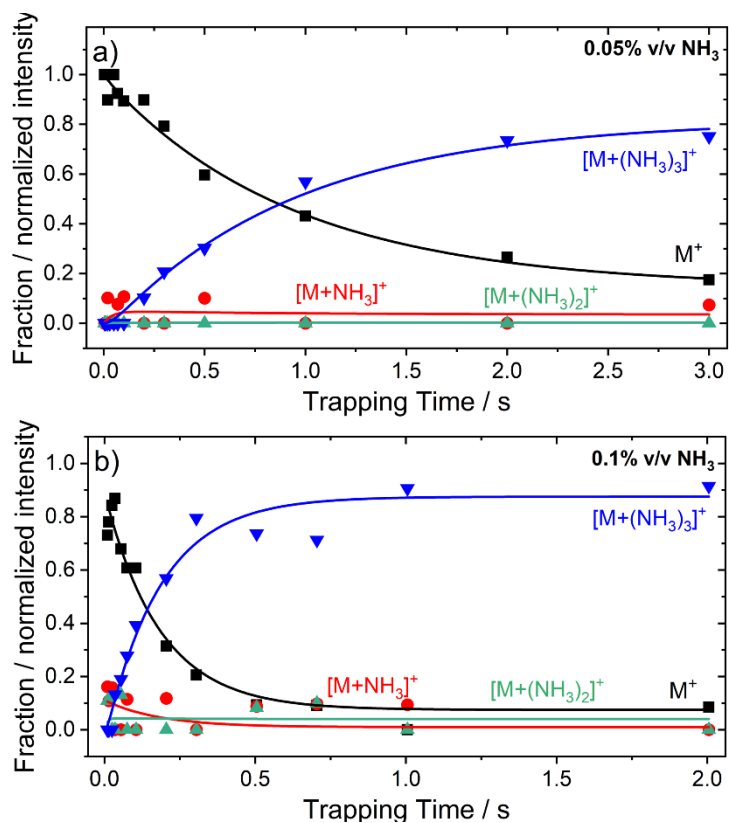

Figure S3. Kinetics of  $\text{NH}_3$  uptake by  $\text{Na}^+[\text{Na}_2\text{SO}_4]_3[\text{NaHSO}_4]_3$  cluster ions ( $m/z = 808.6$ ) exposed to  $\text{NH}_3/\text{He}$  gas mixtures (2.1 Pa) containing (a) 0.05% and (b) 0.1% (v/v) ammonia. The kinetic model assumes reversible  $\text{NH}_3$  uptake.

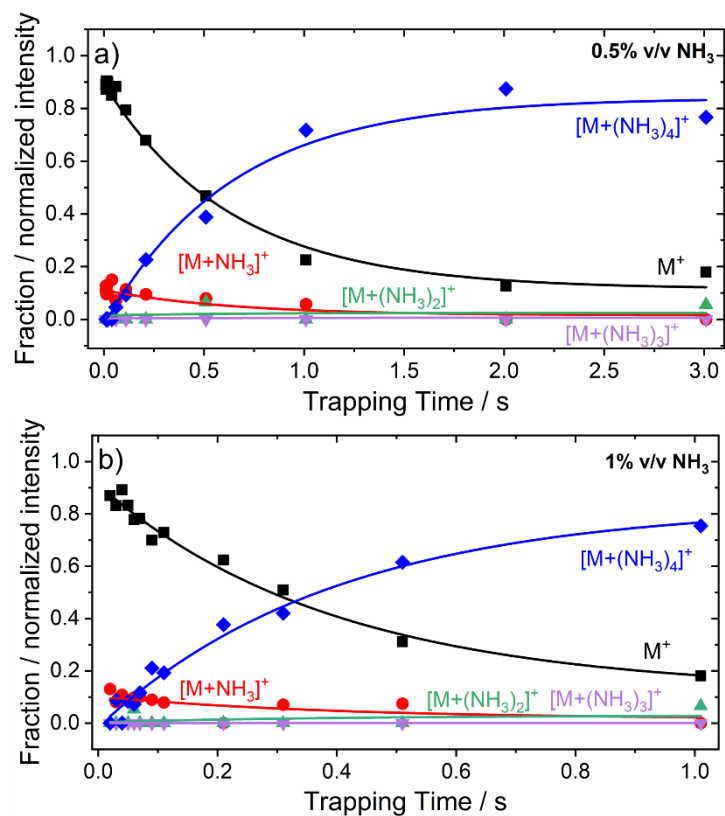

Figure S4. Kinetics of  $\text{NH}_3$  uptake by  $\text{Na}^+[\text{Na}_2\text{SO}_4]_2[\text{NaHSO}_4]_4$  cluster ions ( $m/z = 786.6$ ) exposed to  $\text{NH}_3/\text{He}$  gas mixtures (2.1 Pa) containing (a) 0.5% and (b) 1.0% (v/v) ammonia. The kinetic model assumes reversible  $\text{NH}_3$  uptake.

## Calculated Gibbs energies and Cartesian coordinates of optimized clusters

NH<sub>3</sub>

|                         |                  |                  |                  |
|-------------------------|------------------|------------------|------------------|
| Final Gibbs free energy | ...              | -56.52551615 Eh  |                  |
| N                       | 1.14702696018563 | 1.00554661981032 | 1.43887649524083 |
| H                       | 0.15671900211907 | 0.85053998012559 | 1.28386985526031 |
| H                       | 1.30203360001661 | 1.99585457790846 | 1.28386985548877 |
| H                       | 1.30203360020452 | 0.85053998016615 | 2.42918445335640 |

Na<sup>+</sup>(Na<sub>2</sub>SO<sub>4</sub>)(NaHSO<sub>4</sub>)

|                         |                   |                   |                   |
|-------------------------|-------------------|-------------------|-------------------|
| Final Gibbs free energy | ...               | -2047.86671755 Eh |                   |
| S                       | -3.39985808817083 | -0.42264008323417 | -5.01876254639175 |
| O                       | -3.51643357445839 | 0.44344321614970  | -6.38176622653281 |
| O                       | -4.77189197656024 | -0.67476441337114 | -4.48306710131827 |
| O                       | -2.55928062719843 | 0.32421292393815  | -4.03468233855317 |
| O                       | -2.73733529636470 | -1.68160754748640 | -5.47489652971882 |
| H                       | -3.94585840096515 | 1.29645602462531  | -6.19495291631586 |
| Na                      | -4.29104160820465 | -3.13638717876055 | -4.42189605184532 |
| Na                      | -1.69959467589834 | -5.62035543408873 | -1.72969311980749 |
| Na                      | -1.08863073913350 | -1.65957541714280 | -3.73523171555692 |
| Na                      | -4.02065519628494 | -0.40000158850170 | -2.14735124729102 |
| S                       | -2.86806294238978 | -3.06425688755779 | -1.84992737787605 |
| O                       | -2.69935036217932 | -3.96609957013206 | -0.67257906134344 |
| O                       | -2.12944098585850 | -1.74591474582473 | -1.70303913691422 |
| O                       | -4.31948639038382 | -2.74511718548825 | -2.15620194978291 |
| O                       | -2.27596781295380 | -3.79353832712078 | -3.09719115273756 |

Na<sup>+</sup>(Na<sub>2</sub>SO<sub>4</sub>)(NaHSO<sub>4</sub>)(NH<sub>3</sub>)

|                         |                   |                   |                   |
|-------------------------|-------------------|-------------------|-------------------|
| Final Gibbs free energy | ...               | -2104.40867949 Eh |                   |
| S                       | -1.47871643229425 | -0.52933287388029 | -4.22184428380825 |
| O                       | -1.76054439401919 | 0.60836057929166  | -5.34150636636851 |
| O                       | -1.26760278058946 | -1.84229327109833 | -4.90473354698233 |
| O                       | -2.73149470437384 | -0.51839605080292 | -3.40855483114646 |
| O                       | -0.28225278759708 | -0.13479653311812 | -3.41876915039385 |
| H                       | -0.98609266037922 | 0.69104890470031  | -5.92463897681282 |
| Na                      | -1.61229193117962 | -0.45497548886306 | -1.29827060042848 |
| Na                      | -3.14774101728923 | -4.08850748953568 | 0.83637601098949  |
| Na                      | 0.51655008902205  | -2.49138722441841 | -3.29916367587955 |
| Na                      | -3.00623571456209 | -2.90745808587482 | -3.46961280644530 |
| S                       | -1.26132747062321 | -3.35692697236090 | -1.16901998113327 |
| O                       | -0.22258909300362 | -2.25063068675056 | -1.07747745784946 |
| O                       | -1.17139472830122 | -3.94999840881154 | -2.56576261621554 |
| O                       | -2.66308959392775 | -2.68389634266850 | -1.04384100571129 |
| O                       | -1.13550664309024 | -4.37359813217157 | -0.08857821969055 |
| N                       | -4.46730823442400 | -4.96472571620857 | 2.64958215896998  |
| H                       | -4.77116043998098 | -4.28403241835266 | 3.34080808902482  |
| H                       | -3.92304219415489 | -5.64739397632422 | 3.17127126163223  |
| H                       | -5.31243934553705 | -5.45650664261569 | 2.37185667791223  |

Na<sup>+</sup>(Na<sub>2</sub>SO<sub>4</sub>)(NaHSO<sub>4</sub>)(NH<sub>3</sub>)<sub>2</sub>

|                         |                   |                   |                   |
|-------------------------|-------------------|-------------------|-------------------|
| Final Gibbs free energy | ...               | -2160.94733162 Eh |                   |
| Na                      | -5.86972267558443 | -4.31751653100634 | -0.23877073306948 |
| Na                      | -1.82913277724979 | -4.91997752138115 | -2.08159637236837 |
| Na                      | -5.25068283224768 | -7.61796333907634 | -1.04987883453443 |
| Na                      | -5.17995161281749 | -6.63634241993787 | 2.23382616119398  |
| S                       | -3.35125178645789 | -5.74152018896544 | 0.16082006997470  |
| O                       | -3.63394595446018 | -7.18517391803713 | 0.53578585145616  |
| O                       | -3.96573574818763 | -5.50342766214802 | -1.25452704434472 |

|                                                                                                    |                    |                   |                   |
|----------------------------------------------------------------------------------------------------|--------------------|-------------------|-------------------|
| O                                                                                                  | -4.11441139883633  | -4.85585947281708 | 1.13352187938436  |
| O                                                                                                  | -1.89632291890935  | -5.42307560237994 | 0.09376014017313  |
| N                                                                                                  | -10.35452929378652 | -5.72840311274384 | 2.21017332376325  |
| H                                                                                                  | -10.70098268946289 | -6.34453161961101 | 2.93992505945592  |
| H                                                                                                  | -11.15051563763523 | -5.24157843573646 | 1.80831470125321  |
| H                                                                                                  | -9.63200400915296  | -6.39072365008425 | 1.28117098473328  |
| H                                                                                                  | -9.74177204817880  | -5.03998622646709 | 2.63983134048154  |
| N                                                                                                  | -0.02315181602036  | -4.35412279301544 | -3.57536860283020 |
| H                                                                                                  | 0.19257102884861   | -5.05736279414586 | -4.27672846021346 |
| H                                                                                                  | -0.11587330210798  | -3.48283454871242 | -4.09016110726985 |
| H                                                                                                  | 0.82860601043914   | -4.25257436012540 | -3.02898027683919 |
| S                                                                                                  | -7.51590691837415  | -6.60518328346105 | 0.46736588659099  |
| O                                                                                                  | -7.25539086154335  | -5.48007162407081 | 1.45087262669898  |
| O                                                                                                  | -6.70727709742872  | -7.81684135814066 | 0.84832732009015  |
| O                                                                                                  | -9.02415346393958  | -6.95594622867176 | 0.47769170817803  |
| O                                                                                                  | -7.12224004090611  | -6.16761659626418 | -0.92364894295460 |
| <b>Na<sup>+</sup>(Na<sub>2</sub>SO<sub>4</sub>)(NaHSO<sub>4</sub>)<sub>2</sub></b>                 |                    |                   |                   |
| Final Gibbs free energy                                                                            |                    | ...               | -2909.88002556 Eh |
| S                                                                                                  | 1.68430222396876   | 3.75989454745947  | 3.22628145400943  |
| O                                                                                                  | 1.06232208405237   | 4.93648143114053  | 4.15302196770277  |
| O                                                                                                  | 2.92193022768471   | 3.23139761461451  | 3.90068041114895  |
| O                                                                                                  | 2.01692428636199   | 4.46360161641165  | 1.95904302106055  |
| O                                                                                                  | 0.66922942794384   | 2.68100402415535  | 3.06634395389314  |
| H                                                                                                  | 0.70911303276233   | 4.55401962135549  | 4.97466100290059  |
| S                                                                                                  | 0.80955258399311   | 1.58842081122726  | -2.32997911582638 |
| O                                                                                                  | -0.15755639162275  | 1.63470550252740  | -3.63138061778154 |
| O                                                                                                  | 1.41375223454884   | 2.93776741041722  | -2.12387913035252 |
| O                                                                                                  | 0.01020975601467   | 1.15166318522756  | -1.14765673573645 |
| O                                                                                                  | 1.83522970395524   | 0.57222122537442  | -2.72328876867024 |
| H                                                                                                  | -0.88334667434984  | 2.26389483772390  | -3.47695802234355 |
| Na                                                                                                 | 1.73418551522623   | -0.68663264884322 | -0.73270353175642 |
| Na                                                                                                 | 4.35920086619257   | 3.58532556023107  | 2.03872107007171  |
| Na                                                                                                 | 2.45780456200357   | 0.95265091728884  | 3.38901366722889  |
| Na                                                                                                 | 1.06996856563537   | 2.85688282821534  | 0.38601501454180  |
| Na                                                                                                 | 3.71240810742505   | 1.89366662685846  | -2.13781887115425 |
| S                                                                                                  | 3.55699359901211   | 1.12391602871266  | 0.68200885311523  |
| O                                                                                                  | 2.11777812868107   | 0.74945144332188  | 1.08022832215194  |
| O                                                                                                  | 4.39177222717689   | 1.13940495130268  | 1.93407073983031  |
| O                                                                                                  | 3.99772498023812   | 0.18241627140214  | -0.40471698702172 |
| O                                                                                                  | 3.53364575509593   | 2.54634047787583  | 0.10367426598726  |
| <b>Na<sup>+</sup>(Na<sub>2</sub>SO<sub>4</sub>)(NaHSO<sub>4</sub>)<sub>2</sub>(NH<sub>3</sub>)</b> |                    |                   |                   |
| Final Gibbs free energy                                                                            |                    | ...               | -2966.41688163 Eh |
| S                                                                                                  | 2.33373159534559   | 6.90050836254347  | 0.78994295407185  |
| O                                                                                                  | 1.29046443138655   | 7.94100727367208  | 1.48346885453450  |
| O                                                                                                  | 3.72117938817432   | 7.34537288725753  | 1.08197782233744  |
| O                                                                                                  | 2.02184405156956   | 5.62366507446548  | 1.51502665526082  |
| O                                                                                                  | 2.01044343072430   | 6.85048236079374  | -0.66081998864167 |
| H                                                                                                  | 1.36619551280265   | 8.80403217249140  | 1.04212495820460  |
| Na                                                                                                 | 4.41367056180932   | 5.21433758070782  | 1.83229078615248  |
| Na                                                                                                 | 1.54151161449991   | 3.74019256916849  | 0.41555517485102  |
| Na                                                                                                 | 3.96049256141792   | 2.62736002397514  | -3.29559784958359 |
| Na                                                                                                 | 6.87172142035407   | 4.08714650516064  | -1.80924230093576 |
| Na                                                                                                 | 3.72338255152871   | 6.10135434216409  | -1.98726577377399 |
| S                                                                                                  | 4.25761043288885   | 3.47574328429447  | -0.52312865058714 |

|                                                                        |                   |                   |                   |
|------------------------------------------------------------------------|-------------------|-------------------|-------------------|
| O                                                                      | 3.80432246134748  | 3.08951016369648  | 0.86205945708306  |
| O                                                                      | 3.01207833228057  | 3.72578830490442  | -1.38951643903366 |
| O                                                                      | 5.04256472348253  | 4.79066567972019  | -0.42238071563159 |
| O                                                                      | 5.11901287733720  | 2.45922774230314  | -1.22180160125386 |
| S                                                                      | 5.38138206547214  | 4.99346744545273  | -4.19678863539731 |
| O                                                                      | 3.89623775849731  | 4.91357040629914  | -4.12170425810609 |
| O                                                                      | 5.96456772931904  | 5.95193238675627  | -3.21233270070894 |
| O                                                                      | 6.01269873829647  | 3.63914952378039  | -4.07841408856649 |
| O                                                                      | 5.64872572933070  | 5.56249824796163  | -5.69306695209877 |
| N                                                                      | 8.99055021727083  | 3.05543269612674  | -1.28395580288618 |
| H                                                                      | 6.59424913113962  | 5.76296507478044  | -5.80013455275090 |
| H                                                                      | 8.79234671936252  | 2.10645522682952  | -0.97772225550689 |
| H                                                                      | 9.61171944890162  | 2.95978074121178  | -2.08227821856440 |
| H                                                                      | 9.55685718247047  | 3.46670004548145  | -0.54779445446592 |
| $\text{Na}^+(\text{Na}_2\text{SO}_4)(\text{NaHSO}_4)_2(\text{NH}_3)_2$ |                   |                   |                   |
| Final Gibbs free energy                                                |                   | ...               | -3022.95511068 Eh |
| S                                                                      | 2.04526063280751  | 6.88269416876669  | 0.67055688755233  |
| O                                                                      | 1.15088277816839  | 8.05944435675938  | 1.14390859219431  |
| O                                                                      | 3.42184662934541  | 7.41221822459409  | 0.32233332048023  |
| O                                                                      | 2.15340365098171  | 5.87566463050372  | 1.79166115327678  |
| O                                                                      | 1.42356954697374  | 6.22100359209857  | -0.52811213838188 |
| H                                                                      | 1.63945877943399  | 9.08245252102431  | 1.02731386742142  |
| Na                                                                     | 4.43956134276701  | 5.53421616530054  | 1.58852071763658  |
| Na                                                                     | 1.57480972683498  | 4.01949213797085  | 0.46006633094704  |
| Na                                                                     | 3.96482433634265  | 2.75770607322257  | -3.27455204715036 |
| Na                                                                     | 6.93872401339720  | 3.95216952325236  | -1.80048519410867 |
| Na                                                                     | 3.46011866166027  | 6.10359095189818  | -1.82106137029732 |
| S                                                                      | 4.29172364476995  | 3.51404718272462  | -0.51213521588540 |
| O                                                                      | 3.86194314612959  | 3.27440484661762  | 0.91099928989006  |
| O                                                                      | 3.02903574660563  | 3.70211764417840  | -1.36732145590901 |
| O                                                                      | 5.09041989429405  | 4.82983587449604  | -0.55015007665674 |
| O                                                                      | 5.13363437201179  | 2.43765243147042  | -1.13863334133602 |
| S                                                                      | 5.56239059196431  | 5.08627615812952  | -4.10836498566196 |
| O                                                                      | 4.09330919731349  | 5.22149214277520  | -3.88935195084596 |
| O                                                                      | 6.42048841576348  | 5.94122992194133  | -3.25591245061757 |
| O                                                                      | 5.97483007486829  | 3.64131665648793  | -4.02693000071740 |
| O                                                                      | 5.73048649643047  | 5.56838642950058  | -5.65661815161457 |
| N                                                                      | 9.06054148740396  | 2.89198401889825  | -1.33671700663863 |
| H                                                                      | 6.67539471695905  | 5.69932499257973  | -5.84276540077022 |
| H                                                                      | 8.90089298131468  | 2.05732938377165  | -0.77912779672873 |
| H                                                                      | 9.50426590907553  | 2.56672243930147  | -2.19106981976375 |
| H                                                                      | 9.77558225050799  | 3.41877832453568  | -0.84417217095250 |
| N                                                                      | 2.22698396708006  | 10.31741073155542 | 0.89750469211052  |
| H                                                                      | 1.74605867174779  | 10.91049893741136 | 0.22755153671989  |
| H                                                                      | 3.17546490747226  | 10.16572219649578 | 0.56420556028187  |
| H                                                                      | 2.27717509251092  | 10.81992984293573 | 1.77884856010483  |
| $\text{Na}^+(\text{Na}_2\text{SO}_4)(\text{NaHSO}_4)_3$                |                   |                   |                   |
| Final Gibbs free energy                                                |                   | ...               | -3771.89464810 Eh |
| S                                                                      | -0.48813550452024 | -3.01768810143584 | -2.86695916003805 |
| O                                                                      | 0.03304565222283  | -4.17190100428915 | -3.88260911944489 |
| O                                                                      | 0.63888801158412  | -2.86335727030995 | -1.91250852490343 |
| O                                                                      | -1.74472590250817 | -3.49978606081574 | -2.20822564369301 |
| O                                                                      | -0.75291292203497 | -1.77408949119055 | -3.66046877649462 |
| H                                                                      | -0.64666775641186 | -4.34117166059248 | -4.55752242020829 |

|                                                                                    |                   |                       |                   |
|------------------------------------------------------------------------------------|-------------------|-----------------------|-------------------|
| S                                                                                  | -3.98512639803126 | -1.79386059625342     | 0.82714805973482  |
| O                                                                                  | -5.43659259047704 | -2.26826745641458     | 1.39059078434534  |
| O                                                                                  | -3.62528167905029 | -0.69845687053196     | 1.78183207365882  |
| O                                                                                  | -3.08935890593252 | -2.97135338609569     | 0.88255725550734  |
| O                                                                                  | -4.19956041498733 | -1.23681882258638     | -0.54272831725304 |
| H                                                                                  | -5.69328118984448 | -3.09663301832571     | 0.95091060565003  |
| S                                                                                  | -1.77309459468554 | 2.06682523722776      | -2.40644743467814 |
| O                                                                                  | -1.98351234480556 | 3.17907388708809      | -3.57086234423088 |
| O                                                                                  | -2.01201892371792 | 2.73014140626901      | -1.07904971274625 |
| O                                                                                  | -0.33912504882667 | 1.71081951738686      | -2.56330476922044 |
| O                                                                                  | -2.76728966895797 | 0.98594223769018      | -2.63979265004023 |
| H                                                                                  | -2.93257084130718 | 3.36738159035163      | -3.66924218419441 |
| Na                                                                                 | -1.70211558056751 | -0.66190756334214     | 2.97177327986216  |
| Na                                                                                 | 0.15098790286694  | 2.46598836730278      | -0.17692141242392 |
| Na                                                                                 | 0.65449054907695  | -0.39187356878669     | -2.32111568435622 |
| Na                                                                                 | -3.07766966994051 | 0.88919145350271      | 0.01571136839667  |
| Na                                                                                 | -2.79708173027175 | -1.32144407490589     | -2.39254452191373 |
| Na                                                                                 | -0.94858542995060 | -3.15068337174907     | 0.02308112494383  |
| S                                                                                  | -0.30517327056688 | -0.26774352774168     | 0.51067415322050  |
| O                                                                                  | 0.97801961434591  | 0.26045265142742      | -0.07540497011827 |
| O                                                                                  | -0.11672541176763 | -1.43010677998823     | 1.45450595964496  |
| O                                                                                  | -0.99980886155837 | 0.87353350013396      | 1.26656176865915  |
| O                                                                                  | -1.21864283237432 | -0.71246300702536     | -0.63053676466381 |
| Na <sup>+</sup> (Na <sub>2</sub> SO <sub>4</sub> ) <sub>3</sub> (NH <sub>3</sub> ) |                   |                       |                   |
| Final Gibbs free energy                                                            |                   |                       |                   |
|                                                                                    |                   | ... -3828.43285233 Eh |                   |
| S                                                                                  | -0.66134054927208 | -3.14537122630041     | -2.93136613323177 |
| O                                                                                  | -0.25262852164149 | -4.28642989469262     | -4.01297379293445 |
| O                                                                                  | 0.44889555679033  | -3.19215965218537     | -1.94505932465777 |
| O                                                                                  | -1.98390794565151 | -3.51433123599458     | -2.33214593626495 |
| O                                                                                  | -0.75121142319738 | -1.83069527275740     | -3.64391192436979 |
| H                                                                                  | -0.92529130181711 | -4.32208436597428     | -4.71451062166942 |
| S                                                                                  | -4.08770088732093 | -1.77672875208148     | 0.77244160147691  |
| O                                                                                  | -5.59968415304262 | -2.12956145712144     | 1.26402875556406  |
| O                                                                                  | -3.65419664578004 | -0.77797693036942     | 1.79996747688330  |
| O                                                                                  | -3.31677537634805 | -3.04084194984524     | 0.79146121115997  |
| O                                                                                  | -4.19628561198150 | -1.12930334132218     | -0.56910817711680 |
| H                                                                                  | -5.92601537925206 | -2.89487372891489     | 0.76086067665757  |
| S                                                                                  | -1.38226975148543 | 1.99274636645236      | -2.17354171739708 |
| O                                                                                  | -1.43898588933570 | 3.22573099396900      | -3.24006037659932 |
| O                                                                                  | -1.57930414901360 | 2.57012104999277      | -0.80271179376977 |
| O                                                                                  | -0.00132391914668 | 1.48351151291947      | -2.35675700989224 |
| O                                                                                  | -2.49488675865933 | 1.06683514564091      | -2.51953146621993 |
| H                                                                                  | -2.36419169738148 | 3.50035986813903      | -3.35636859128192 |
| Na                                                                                 | -1.76168649782270 | -1.04579449302742     | 3.01695562499976  |
| Na                                                                                 | 0.57198255921042  | 2.10532309454469      | 0.15396626154475  |
| Na                                                                                 | 0.75068951946461  | -0.71557833671129     | -2.15812759874306 |
| Na                                                                                 | -2.86966573293315 | 0.84868375733721      | 0.17788340245667  |
| Na                                                                                 | -2.76158865649538 | -1.21819992274031     | -2.38423294788727 |
| Na                                                                                 | -1.18939942095587 | -3.37566998232293     | -0.06536852783304 |
| S                                                                                  | -0.25319912665994 | -0.63075963194902     | 0.63804713015588  |
| O                                                                                  | 1.09565285691210  | -0.21626046747539     | 0.11735606257834  |
| O                                                                                  | -0.22080476271729 | -1.87234229258810     | 1.49879147775902  |
| O                                                                                  | -0.84600631604895 | 0.51898715477466      | 1.45934610726405  |
| O                                                                                  | -1.17645577121441 | -0.89878023500553     | -0.55339386953017 |

|                                                                        |                   |                   |                   |
|------------------------------------------------------------------------|-------------------|-------------------|-------------------|
| N                                                                      | 1.58535678654533  | 4.14219105369572  | -0.62255520098133 |
| H                                                                      | 0.86662337600487  | 4.86032212925853  | -0.65043380605229 |
| H                                                                      | 1.84460453123285  | 3.98707807873760  | -1.59325903139285 |
| H                                                                      | 2.39268923842940  | 4.57610288240837  | -0.18572735744595 |
| $\text{Na}^+(\text{Na}_2\text{SO}_4)(\text{NaHSO}_4)_3(\text{NH}_3)_2$ |                   |                   |                   |
| Final Gibbs free energy                                                | ...               | -3884.96968264    | Eh                |
| S                                                                      | -0.44298101173413 | -3.04309135525907 | -2.91038641636588 |
| O                                                                      | 0.10948795391805  | -4.20838882890324 | -3.90209695076589 |
| O                                                                      | 0.64589579772138  | -2.89287383066544 | -1.91354792911805 |
| O                                                                      | -1.72993650857157 | -3.51259504290623 | -2.30528884954888 |
| O                                                                      | -0.66451918011898 | -1.80381080562304 | -3.72438300539655 |
| H                                                                      | -0.55324923629635 | -4.38220359317765 | -4.59191984679558 |
| S                                                                      | -4.09558767904197 | -1.76705515674203 | 0.59528837962075  |
| O                                                                      | -5.57965999214295 | -2.22735760564408 | 1.09771231885874  |
| O                                                                      | -3.77013032269866 | -0.66527965561895 | 1.55012809594713  |
| O                                                                      | -3.22246776739076 | -2.95862557223478 | 0.70126648476523  |
| O                                                                      | -4.24905875309236 | -1.22812521482281 | -0.79052039758178 |
| H                                                                      | -5.80162905921543 | -3.07421719912113 | 0.67579154154144  |
| S                                                                      | -1.76652327299248 | 2.11271762008200  | -2.55490978564191 |
| O                                                                      | -1.93998818306810 | 3.17623965500328  | -3.69134469722759 |
| O                                                                      | -2.05093466185969 | 2.75797162551168  | -1.21836808387685 |
| O                                                                      | -0.32684871402838 | 1.69746903202042  | -2.59552939361652 |
| O                                                                      | -2.75078186167217 | 1.00231226453769  | -2.79237961326436 |
| H                                                                      | -2.93466824387776 | 3.17899696240418  | -4.12980907140362 |
| Na                                                                     | -1.90813437341628 | -0.62059991123093 | 2.89927968514914  |
| Na                                                                     | 0.06466085044396  | 2.44131622276619  | -0.28153485706144 |
| Na                                                                     | 0.63589412816834  | -0.38385183562725 | -2.31964570543841 |
| Na                                                                     | -3.10094078411025 | 0.90754123106196  | -0.18497952943390 |
| Na                                                                     | -2.71839129103590 | -1.27845436979418 | -2.52765338011332 |
| Na                                                                     | -1.03252456526501 | -3.11714962484115 | -0.03516051070568 |
| S                                                                      | -0.38247799145106 | -0.27122070977703 | 0.47614049200527  |
| O                                                                      | 0.92700179346401  | 0.24283515154391  | -0.06441860839217 |
| O                                                                      | -0.23857569719819 | -1.42266154309927 | 1.43879681266349  |
| O                                                                      | -1.10714216780116 | 0.88336953760655  | 1.17425270722992  |
| O                                                                      | -1.24574529351304 | -0.73599334679962 | -0.70123572148668 |
| N                                                                      | -4.24530023316534 | 3.20967819893707  | -4.80759548960884 |
| H                                                                      | -4.76421401351657 | 2.36815736529454  | -4.57516495247872 |
| H                                                                      | -4.14151621142012 | 3.23669600951368  | -5.81755454550851 |
| H                                                                      | -4.81331586412968 | 4.00724864207153  | -4.53859305850520 |
| N                                                                      | -1.63674241000694 | -0.47956818841251 | 5.29852896428973  |
| H                                                                      | -2.16685180661747 | 0.26536841583209  | 5.74179147296662  |
| H                                                                      | -0.66686190276320 | -0.30826498717224 | 5.54828233240976  |
| H                                                                      | -1.89796336982662 | -1.32662288153011 | 5.79547840698518  |
| $\text{Na}^+(\text{Na}_2\text{SO}_4)(\text{NaHSO}_4)_3(\text{NH}_3)_3$ |                   |                   |                   |
| Final Gibbs free energy                                                | ...               | -3941.50604584    | Eh                |
| S                                                                      | -0.45965784758387 | -3.07000328529986 | -2.80162960554153 |
| O                                                                      | -0.02572058522639 | -4.26547507196429 | -3.81709864393650 |
| O                                                                      | 0.67699689783479  | -2.99541434730664 | -1.85092521471939 |
| O                                                                      | -1.74808127551254 | -3.45969470843346 | -2.14415655981530 |
| O                                                                      | -0.63518891430748 | -1.81629687085168 | -3.60371809564405 |
| H                                                                      | -0.72610358556845 | -4.39239182052964 | -4.47932490172940 |
| S                                                                      | -3.88599118623347 | -1.64269266993556 | 0.85889521036504  |
| O                                                                      | -5.37263604792249 | -2.03672060207261 | 1.41792424117510  |
| O                                                                      | -3.48264425713223 | -0.55496604159360 | 1.79841042620358  |

|                                                                                      |                   |                   |                   |
|--------------------------------------------------------------------------------------|-------------------|-------------------|-------------------|
| O                                                                                    | -3.06350328695198 | -2.87127510010403 | 0.94260590151090  |
| O                                                                                    | -4.06694957767038 | -1.10588670539584 | -0.52404218093529 |
| H                                                                                    | -5.66871021297633 | -2.84442029227282 | 0.96586274802795  |
| S                                                                                    | -1.50225028844888 | 2.12754956780057  | -2.38128580867649 |
| O                                                                                    | -1.67437627083584 | 3.24488144506629  | -3.47971265895485 |
| O                                                                                    | -1.68003728941957 | 2.75261450504376  | -1.02131936181754 |
| O                                                                                    | -0.10125048828390 | 1.63204286360116  | -2.53814990980315 |
| O                                                                                    | -2.56864399330545 | 1.09025821127655  | -2.59800627341216 |
| H                                                                                    | -2.68628938635575 | 3.32460731264040  | -3.82733566599579 |
| Na                                                                                   | -1.53740585209515 | -0.62269942007034 | 3.07004921272777  |
| Na                                                                                   | 0.49450282585464  | 2.42335035355794  | -0.11882711028603 |
| Na                                                                                   | 0.77660957860799  | -0.46753959030318 | -2.23169543767842 |
| Na                                                                                   | -2.77893264352472 | 0.97819346213262  | 0.05066380558188  |
| Na                                                                                   | -2.61788201860955 | -1.18406585716212 | -2.33116612500479 |
| Na                                                                                   | -0.92097083066746 | -3.12349388770522 | 0.09136468386146  |
| S                                                                                    | -0.10906888007410 | -0.31871531065736 | 0.59336770669670  |
| O                                                                                    | 1.19740782533282  | 0.13379486304548  | -0.00023488468350 |
| O                                                                                    | 0.01846281899106  | -1.48966074569356 | 1.53689509166559  |
| O                                                                                    | -0.74941968259964 | 0.85443615384795  | 1.33855084044814  |
| O                                                                                    | -1.04601917876138 | -0.73108442428819 | -0.54976914555790 |
| N                                                                                    | -4.08148991279948 | 3.42570735805998  | -4.39724907635026 |
| H                                                                                    | -4.59064311932369 | 2.58415249673479  | -4.14391700392676 |
| H                                                                                    | -4.07164979223612 | 3.48157558092300  | -5.41116079206866 |
| H                                                                                    | -4.61241983185380 | 4.22068544721709  | -4.05548449904567 |
| N                                                                                    | -2.52375472907201 | -1.34104605514097 | 5.14528877094497  |
| H                                                                                    | -2.52973315472659 | -0.70394729178191 | 5.93625235716778  |
| H                                                                                    | -2.18295738100628 | -2.22504165163011 | 5.51171605654356  |
| H                                                                                    | -3.50092218842197 | -1.49850012308952 | 4.91189724655848  |
| N                                                                                    | 1.34559130261134  | 4.35254286181551  | -1.27654548818000 |
| H                                                                                    | 1.34024757008400  | 4.00823097117383  | -2.23372080687270 |
| H                                                                                    | 2.23750401643191  | 4.81796119461850  | -1.14481658102690 |
| H                                                                                    | 0.63950320587368  | 5.08275757060904  | -1.25351683058679 |
| Na <sup>+</sup> (Na <sub>2</sub> SO <sub>4</sub> )(NaHSO <sub>4</sub> ) <sub>4</sub> |                   |                   |                   |
| Final Gibbs free energy                                                              |                   | ...               | -4633.88888739 Eh |
| S                                                                                    | -1.09485226207224 | -4.50884867641395 | -4.31743885865103 |
| O                                                                                    | -1.62282650435432 | -5.49800514582444 | -5.49544632975237 |
| O                                                                                    | 0.16857145468484  | -5.10205137704741 | -3.77148276252502 |
| O                                                                                    | -0.91162630378597 | -3.17117917633270 | -4.92209339253979 |
| O                                                                                    | -2.19449762399689 | -4.62312829719816 | -3.31310001033637 |
| H                                                                                    | -1.09194035322926 | -5.35619410238666 | -6.29760729553154 |
| S                                                                                    | -2.44757944254356 | -3.68057805658019 | 1.01269616141449  |
| O                                                                                    | -3.54821613529228 | -4.31072174435782 | 2.03119123094289  |
| O                                                                                    | -1.17556510702745 | -3.56874452671727 | 1.76010449920060  |
| O                                                                                    | -2.98365381122978 | -2.36475711157698 | 0.53551678375587  |
| O                                                                                    | -2.46232327072148 | -4.67723531167575 | -0.09951220049155 |
| H                                                                                    | -3.49910849800431 | -3.84898903644548 | 2.88554255968754  |
| S                                                                                    | -0.45828103982213 | 1.72017757554519  | -2.18647593506289 |
| O                                                                                    | -0.69067806170440 | 3.28151464122463  | -2.60634722576747 |
| O                                                                                    | 0.97270234754582  | 1.59306518322362  | -1.79647147738214 |
| O                                                                                    | -1.38825078414035 | 1.44580708776291  | -1.05407990363881 |
| O                                                                                    | -0.81389667051399 | 1.01746292588421  | -3.44088959145683 |
| H                                                                                    | -0.45182199824710 | 3.84426205005931  | -1.85157293935123 |
| S                                                                                    | 3.94103597906482  | -3.06070457284477 | -0.36605156873723 |
| O                                                                                    | 5.51601471196475  | -3.16811221092971 | 0.05272285345091  |

|                                                                                                         |                   |                   |                    |
|---------------------------------------------------------------------------------------------------------|-------------------|-------------------|--------------------|
| O                                                                                                       | 3.76756175858214  | -3.91323792028009 | -1.57678248717334  |
| O                                                                                                       | 3.15748122387300  | -3.56334020313571 | 0.79833847693631   |
| O                                                                                                       | 3.79048760034072  | -1.61014392517713 | -0.61514926607348  |
| H                                                                                                       | 5.72453222945425  | -4.09853153170381 | 0.23761340164731   |
| Na                                                                                                      | -3.15896335967793 | -3.18868197489694 | -1.81613239448272  |
| Na                                                                                                      | -0.89608505711997 | -5.50765568318294 | -1.54077706611797  |
| Na                                                                                                      | -1.73519096482559 | -0.44629607979463 | 0.02440837083526   |
| Na                                                                                                      | 2.03914592891197  | -3.95987655020650 | -2.94692136282827  |
| Na                                                                                                      | 1.01941541080385  | -3.19527353640066 | 1.21064264707874   |
| Na                                                                                                      | -0.56512570783864 | -1.05419225375706 | -4.11839888043689  |
| Na                                                                                                      | 2.29546128708281  | -0.10905546931834 | -1.24927129441135  |
| S                                                                                                       | 0.15484843139656  | -2.19907769214383 | -1.46193663144096  |
| O                                                                                                       | 1.10263081203278  | -1.80777378546303 | -2.58117021503744  |
| O                                                                                                       | 0.43782627187791  | -1.37383201720241 | -0.22008576449878  |
| O                                                                                                       | -1.26578201129285 | -1.92785339819313 | -1.91984284550765  |
| O                                                                                                       | 0.37246411082775  | -3.66195778751265 | -1.12359848571702  |
| Na <sup>+</sup> (Na <sub>2</sub> SO <sub>4</sub> )(NaHSO <sub>4</sub> ) <sub>4</sub> (NH <sub>3</sub> ) |                   |                   |                    |
| Final Gibbs free energy                                                                                 |                   | ...               | -4690.42743191 Eh  |
| S                                                                                                       | 0.78177782593791  | -0.38813542470217 | -4.58529635207778  |
| O                                                                                                       | 1.16826289658258  | -1.25425497533000 | -5.91543189714662  |
| O                                                                                                       | 1.55869483248844  | -0.95962666512118 | -3.46507130040107  |
| O                                                                                                       | 1.12151097935922  | 1.04386680175881  | -4.88992405436252  |
| O                                                                                                       | -0.70076042050103 | -0.56731133774082 | -4.52673096987445  |
| H                                                                                                       | 2.12544946708097  | -1.42229748835550 | -5.91230215506039  |
| S                                                                                                       | 2.74329920271529  | 1.06105875666139  | 1.00343637285262   |
| O                                                                                                       | 1.96068631866733  | 0.98295520018446  | 2.27347578695361   |
| O                                                                                                       | 4.18638233235292  | 1.73767579892709  | 1.35903456636265   |
| O                                                                                                       | 3.01554029252866  | -0.25449799489037 | 0.37782763015208   |
| O                                                                                                       | 2.14762633751873  | 2.06945050583876  | 0.07058795210718   |
| H                                                                                                       | 4.73874434968247  | 1.07797360279685  | 1.81105670425216   |
| S                                                                                                       | -2.42090565964304 | 1.10650540625096  | 3.29018496634096   |
| O                                                                                                       | -3.02770689965713 | 1.68867643340066  | 4.68484174177480   |
| O                                                                                                       | -1.58422006991734 | 2.17309139017984  | 2.69614898834403   |
| O                                                                                                       | -1.69437494312205 | -0.11194739258643 | 3.74611217227314   |
| O                                                                                                       | -3.58545098253679 | 0.72966822348219  | 2.41916265550260   |
| H                                                                                                       | -3.35163818194243 | 2.59319915515340  | 4.53682236721400   |
| Na                                                                                                      | -1.17960739147461 | 1.80609470086812  | -4.96992913949128  |
| Na                                                                                                      | -3.16043585023326 | 1.13591885960633  | 0.12331078066595   |
| Na                                                                                                      | -0.00051229765163 | 2.12254109541321  | 1.04437450318986   |
| Na                                                                                                      | 1.33587464178251  | -0.69785581733341 | -1.16386405431104  |
| Na                                                                                                      | -3.09413421018372 | -1.63101772131005 | 2.41410730017736   |
| Na                                                                                                      | -1.67986002033571 | -1.02799942996621 | -2.42597237166842  |
| Na                                                                                                      | 0.41703709495165  | -0.71256445017132 | 2.89565575523501   |
| S                                                                                                       | -1.28965990401691 | 1.92319134434639  | -1.95162117649342  |
| O                                                                                                       | -0.14059761191561 | 0.93757342044795  | -1.91346042399851  |
| O                                                                                                       | -0.96889420950460 | 2.97123312417655  | -3.01177223562835  |
| O                                                                                                       | -2.55973003721279 | 1.17084664313547  | -2.31948365685427  |
| O                                                                                                       | -1.48313249095445 | 2.57544418214476  | -0.60220503163549  |
| S                                                                                                       | -1.05119792684829 | -1.46276881324179 | 0.44149640470153   |
| O                                                                                                       | -1.02864362843515 | -2.34147506569515 | 1.67071313588469   |
| O                                                                                                       | -0.24835580228986 | -0.20645340185836 | 0.76330701445391   |
| O                                                                                                       | -2.50296797093989 | -1.08253022702532 | 0.13361669523552   |
| O                                                                                                       | -0.45575895816467 | -2.11812697679117 | -0.77680229491173  |
| N                                                                                                       | 1.82959044154321  | 2.81283615167022  | -2.737444492584678 |

|                                                                                                                      |                   |                   |                   |
|----------------------------------------------------------------------------------------------------------------------|-------------------|-------------------|-------------------|
| H                                                                                                                    | 1.86235098625330  | 2.04420467235784  | -3.43032355029943 |
| H                                                                                                                    | 2.48633551311942  | 3.55058962424420  | -2.98032227711938 |
| H                                                                                                                    | 0.83759750194420  | 3.14453423325338  | -2.77666502655874 |
| H                                                                                                                    | 2.02367582696858  | 2.45472424582212  | -1.78645193093790 |
| Na <sup>+</sup> (Na <sub>2</sub> SO <sub>4</sub> )(NaHSO <sub>4</sub> ) <sub>4</sub> (NH <sub>3</sub> ) <sub>2</sub> |                   |                   |                   |
| Final Gibbs free energy                                                                                              |                   | ...               | -4746.96421451 Eh |
| S                                                                                                                    | 0.95916894948781  | -0.20730108943990 | -4.70440804229957 |
| O                                                                                                                    | 1.41600588786468  | -0.99802047622293 | -6.06011627210777 |
| O                                                                                                                    | 1.66731317435496  | -0.85266318417141 | -3.57850794249885 |
| O                                                                                                                    | 1.32429150652745  | 1.23652803645420  | -4.90350363432574 |
| O                                                                                                                    | -0.52539773639596 | -0.37744601417404 | -4.73913054725520 |
| H                                                                                                                    | 2.37025115257730  | -1.17485483165001 | -6.01081785231330 |
| S                                                                                                                    | 2.60254487960704  | 0.91167566549909  | 1.06009956060186  |
| O                                                                                                                    | 1.75828031908972  | 0.74461737095969  | 2.28050559569743  |
| O                                                                                                                    | 4.02292558268174  | 1.56528836891707  | 1.53459741573864  |
| O                                                                                                                    | 2.91460536662425  | -0.35808933923552 | 0.36187724379418  |
| O                                                                                                                    | 2.05038574855363  | 1.97959920339166  | 0.16801073682031  |
| H                                                                                                                    | 4.55120534475864  | 0.87818954164371  | 1.97423365641502  |
| S                                                                                                                    | -2.60931723042858 | 0.84775595265818  | 3.08898801304357  |
| O                                                                                                                    | -3.38050926806816 | 1.29721156904200  | 4.46228904837758  |
| O                                                                                                                    | -1.71787362261669 | 1.96545737079197  | 2.70685036757402  |
| O                                                                                                                    | -1.93053293864499 | -0.40488903790477 | 3.51776357796477  |
| O                                                                                                                    | -3.67517709654823 | 0.56923283214871  | 2.07243714979168  |
| H                                                                                                                    | -3.68811843365091 | 2.21355132281543  | 4.36256948902905  |
| Na                                                                                                                   | -0.99289683615294 | 2.01625793078251  | -5.05318239668743 |
| Na                                                                                                                   | -3.22743766606006 | 1.01674229168250  | -0.17485701604666 |
| Na                                                                                                                   | -0.14654759356085 | 1.97159087390900  | 1.04090623392906  |
| Na                                                                                                                   | 1.31790933077441  | -0.71306279790367 | -1.28116843273637 |
| Na                                                                                                                   | -3.33314282445789 | -1.87679247178947 | 2.01234817758740  |
| Na                                                                                                                   | -1.61578631759251 | -0.96882271791266 | -2.71491858119197 |
| Na                                                                                                                   | 0.18293403993460  | -0.97973506759656 | 2.69124198959039  |
| S                                                                                                                    | -1.24322153920592 | 1.95760056481564  | -2.05514751876423 |
| O                                                                                                                    | -0.09880307610762 | 0.96729808708057  | -2.02247130086739 |
| O                                                                                                                    | -0.86468894954018 | 3.07239609529310  | -3.02487038584398 |
| O                                                                                                                    | -2.49123251995657 | 1.23559381371763  | -2.54428423752862 |
| O                                                                                                                    | -1.51392983866644 | 2.52029037071514  | -0.67956614837942 |
| S                                                                                                                    | -1.16281206041374 | -1.57109574715336 | 0.13859558809752  |
| O                                                                                                                    | -1.19515895357492 | -2.51438729422272 | 1.31555252664275  |
| O                                                                                                                    | -0.41116842941184 | -0.31588981800571 | 0.57804676819559  |
| O                                                                                                                    | -2.59461711184949 | -1.19921112135086 | -0.25279249956091 |
| O                                                                                                                    | -0.47111212567454 | -2.14758760696024 | -1.07092572050646 |
| N                                                                                                                    | 1.90940703648604  | 2.87748770517340  | -2.61029637743654 |
| H                                                                                                                    | 1.97860672396881  | 2.14176377790769  | -3.33492642275460 |
| H                                                                                                                    | 2.57772724520394  | 3.62403505178699  | -2.78471112374698 |
| H                                                                                                                    | 0.92021763587449  | 3.21303053649641  | -2.68623558796242 |
| H                                                                                                                    | 2.05153425350368  | 2.47610430616838  | -1.66733754194294 |
| N                                                                                                                    | -4.72252236662734 | -2.36487816245069 | 3.92282985809578  |
| H                                                                                                                    | -4.46344619394026 | -1.61899260087758 | 4.56426655903155  |
| H                                                                                                                    | -4.54201177538308 | -3.23103795496246 | 4.42157269933835  |
| H                                                                                                                    | -5.73185737965439 | -2.30758761259918 | 3.82827151695787  |
| Na <sup>+</sup> (Na <sub>2</sub> SO <sub>4</sub> )(NaHSO <sub>4</sub> ) <sub>4</sub> (NH <sub>3</sub> ) <sub>3</sub> |                   |                   |                   |
| Final Gibbs free energy                                                                                              |                   | ...               | -4803.50654074 Eh |
| S                                                                                                                    | 0.45707894811488  | 2.69454916309547  | 3.10654612501230  |
| O                                                                                                                    | 1.60293325579351  | 3.50780708598215  | 3.94782216646385  |

|                                                                                                                      |                   |                   |                   |
|----------------------------------------------------------------------------------------------------------------------|-------------------|-------------------|-------------------|
| O                                                                                                                    | -0.14366688908793 | 3.66385018958297  | 2.15684903156252  |
| O                                                                                                                    | -0.50212723088979 | 2.14451849316581  | 4.09538784937259  |
| O                                                                                                                    | 1.28018805999051  | 1.63714203673571  | 2.44206250790231  |
| H                                                                                                                    | 1.17925243093453  | 4.25891647806383  | 4.39526262976295  |
| Na                                                                                                                   | 1.02901445848279  | -2.69529562487223 | 2.84311827243743  |
| Na                                                                                                                   | -2.36213132212939 | -1.01921924704328 | -0.06037861491972 |
| Na                                                                                                                   | -4.64211463875666 | -1.24733750519325 | 2.55808488412760  |
| Na                                                                                                                   | -2.10897086771745 | 0.56196270167260  | 3.92176167832327  |
| Na                                                                                                                   | -1.52655481812901 | 3.11119471070205  | 0.43918702847630  |
| Na                                                                                                                   | 0.28863112918234  | -1.13952902650776 | -2.59409465039646 |
| Na                                                                                                                   | -0.03382009489477 | 0.11475270212209  | 1.30794487075200  |
| S                                                                                                                    | -0.79814569947359 | 1.35311961874447  | -1.89420422985315 |
| O                                                                                                                    | -0.02234006881821 | 1.45094841842281  | -0.56579718552616 |
| O                                                                                                                    | -1.69916945264087 | 0.12368121978244  | -1.88044064360556 |
| O                                                                                                                    | 0.18353095367942  | 1.21078531800205  | -3.00753500287176 |
| O                                                                                                                    | -1.68064590937413 | 2.59223968691372  | -1.95355317442780 |
| S                                                                                                                    | 1.17648400316755  | -2.31243995416323 | -0.04966245342422 |
| O                                                                                                                    | -0.27033828026264 | -1.90920443584438 | -0.32621717634868 |
| O                                                                                                                    | 1.92757555565689  | -2.27434234723743 | -1.33724340786140 |
| O                                                                                                                    | 1.76541994218507  | -1.32658460320029 | 0.96786706711208  |
| O                                                                                                                    | 1.18448344366203  | -3.67474281377642 | 0.63807045604728  |
| S                                                                                                                    | -3.65900962485935 | 1.23403388328892  | 1.40566798824829  |
| O                                                                                                                    | -3.86247337286454 | 2.61617169444805  | 0.87586823892969  |
| O                                                                                                                    | -2.15606015626021 | 0.93626642803700  | 1.42495379233725  |
| O                                                                                                                    | -4.18882134209594 | 1.00518531210996  | 2.80058209590570  |
| O                                                                                                                    | -4.31528637250274 | 0.19378140659583  | 0.47359120984000  |
| S                                                                                                                    | -1.93518197182835 | -2.29785247768623 | 3.02552196610919  |
| O                                                                                                                    | -2.71006674987167 | -2.42661350845647 | 1.71215141701059  |
| O                                                                                                                    | -2.90138667474886 | -1.80280609706252 | 4.06853394298042  |
| O                                                                                                                    | -1.27710504392709 | -3.62656550694002 | 3.34779734607976  |
| O                                                                                                                    | -0.80557863269003 | -1.27645211984057 | 2.90842515283895  |
| N                                                                                                                    | -1.16328707385416 | -4.90778050805703 | 0.95316832740239  |
| H                                                                                                                    | -0.22922510765400 | -4.48370399098376 | 0.65848846252939  |
| H                                                                                                                    | -1.30174353763297 | -4.61809036601622 | 1.95793022255125  |
| H                                                                                                                    | -1.18004563758864 | -5.91663614354656 | 0.83133673358634  |
| H                                                                                                                    | -1.91379154717437 | -4.46613413647414 | 0.42671583682147  |
| N                                                                                                                    | -4.28507711700329 | 1.90133969652857  | -1.84948192513935 |
| H                                                                                                                    | -4.79770965799507 | 2.69581941807812  | -1.46967133374293 |
| H                                                                                                                    | -4.67413436807614 | 1.61409777126616  | -2.74373948672426 |
| H                                                                                                                    | -4.35204976933805 | 1.13993064381868  | -1.14221291492815 |
| H                                                                                                                    | -3.25479553623145 | 2.16987510139307  | -1.95711885170854 |
| N                                                                                                                    | 2.60458181384214  | 1.21703038087292  | 0.01075195896882  |
| H                                                                                                                    | 1.69726395541688  | 1.42717017572443  | -0.48308085641017 |
| H                                                                                                                    | 2.55152963062157  | 1.70575294457263  | 0.91662552769217  |
| H                                                                                                                    | 3.41729804034223  | 1.49521086155414  | -0.53211392961248 |
| H                                                                                                                    | 2.60334581629773  | 0.19838845364600  | 0.21827411931287  |
| Na <sup>+</sup> (Na <sub>2</sub> SO <sub>4</sub> )(NaHSO <sub>4</sub> ) <sub>4</sub> (NH <sub>3</sub> ) <sub>4</sub> |                   |                   |                   |
| Final Gibbs free energy                                                                                              |                   | ...               | -4860.04264792 Eh |
| S                                                                                                                    | 0.75339066783522  | 2.48397825371685  | 3.01316701336306  |
| O                                                                                                                    | 1.97490077965740  | 3.24555588597286  | 3.79643086752825  |
| O                                                                                                                    | 0.04775989984510  | 3.52078831682802  | 2.21904382731630  |
| O                                                                                                                    | -0.09184144117018 | 1.83965865647883  | 4.04921202372188  |
| O                                                                                                                    | 1.50683744828724  | 1.49695809406974  | 2.18169390668643  |
| H                                                                                                                    | 1.59645337614456  | 3.97546113740560  | 4.31386129760614  |

|                                                                                       |                   |                   |                   |
|---------------------------------------------------------------------------------------|-------------------|-------------------|-------------------|
| Na                                                                                    | 1.47795484591923  | -2.70762984892926 | 2.41995592221015  |
| Na                                                                                    | -2.36934324563827 | -1.01268387129311 | -0.09864612616720 |
| Na                                                                                    | -4.46410053835501 | -1.32038482113532 | 2.63713500163266  |
| Na                                                                                    | -1.80032719211221 | 0.36305565245280  | 3.90371037107149  |
| Na                                                                                    | -1.43050831255869 | 3.09191072587393  | 0.54413138783750  |
| Na                                                                                    | 0.04161968904937  | -1.00439809297290 | -2.86252910245174 |
| Na                                                                                    | 0.05826061036046  | 0.01934579973482  | 1.13681684586151  |
| S                                                                                     | -0.94805565563704 | 1.45608905789595  | -1.92743935332272 |
| O                                                                                     | -0.07824398242401 | 1.47732548183844  | -0.65510012561181 |
| O                                                                                     | -1.86440794069146 | 0.23900768091238  | -1.90864186786209 |
| O                                                                                     | -0.04962204812524 | 1.36173386831692  | -3.11479775621344 |
| O                                                                                     | -1.81017941252724 | 2.70882452170487  | -1.86394485216619 |
| S                                                                                     | 1.15849765001515  | -2.28554916051818 | -0.46839617254675 |
| O                                                                                     | -0.30520111512348 | -1.86407214357739 | -0.57947138245718 |
| O                                                                                     | 1.77030803469834  | -2.20905980750828 | -1.82671134794792 |
| O                                                                                     | 1.86005534609167  | -1.32673787367881 | 0.50580470926037  |
| O                                                                                     | 1.23448886317609  | -3.66356115815791 | 0.17471847922944  |
| S                                                                                     | -3.51762953729611 | 1.19283177107032  | 1.57085757664145  |
| O                                                                                     | -3.71073556110378 | 2.60181838799112  | 1.11001718054406  |
| O                                                                                     | -2.02511459156622 | 0.85006621669800  | 1.48853115847267  |
| O                                                                                     | -3.97064450407949 | 0.92451228859781  | 2.98345488064805  |
| O                                                                                     | -4.25914138437916 | 0.21293345705851  | 0.63721217335768  |
| S                                                                                     | -1.76636038753367 | -2.46414109607879 | 2.87576354857127  |
| O                                                                                     | -2.62917173545955 | -2.49635030793237 | 1.61051970245294  |
| O                                                                                     | -2.61669992616307 | -1.88731100256398 | 3.98301086190045  |
| O                                                                                     | -1.27210040189588 | -3.86253783406803 | 3.16974496267353  |
| O                                                                                     | -0.55627494047308 | -1.55481108112962 | 2.68651066556002  |
| N                                                                                     | -1.06576417797622 | -4.93207922915011 | 0.69538767407851  |
| H                                                                                     | -0.16623187992675 | -4.46642608774248 | 0.36012671826545  |
| H                                                                                     | -1.18310013237552 | -4.68096314461885 | 1.71986240273946  |
| H                                                                                     | -1.04352807425599 | -5.93668191551144 | 0.54369008897458  |
| H                                                                                     | -1.85719814347819 | -4.51443517037125 | 0.21108801286661  |
| N                                                                                     | -4.40627050978929 | 2.04457268910307  | -1.58268028503732 |
| H                                                                                     | -4.86186524480508 | 2.82206444109205  | -1.10735809589849 |
| H                                                                                     | -4.88235335018396 | 1.82132497249921  | -2.45264871987579 |
| H                                                                                     | -4.42435772158566 | 1.24190830912612  | -0.91964395747266 |
| H                                                                                     | -3.38382161647462 | 2.30221434796809  | -1.76570311771330 |
| N                                                                                     | 2.59872680269901  | 1.21775629525546  | -0.39393561868889 |
| H                                                                                     | 1.63240502840124  | 1.44087176700857  | -0.75310425395050 |
| H                                                                                     | 2.67479447647537  | 1.68237309647416  | 0.51979110304075  |
| H                                                                                     | 3.32959533610580  | 1.50733883298371  | -1.03750945634763 |
| H                                                                                     | 2.61263445867729  | 0.19112397932075  | -0.21451206292031 |
| N                                                                                     | 1.58029702778767  | -3.76334719714487 | 4.56719151288193  |
| H                                                                                     | 1.77559826199603  | -3.15864223101853 | 5.35911882494412  |
| H                                                                                     | 2.08845615454969  | -4.62336659299316 | 4.74637862697522  |
| H                                                                                     | 0.58923709881248  | -3.99410093493022 | 4.62431769524763  |
| Na <sup>+</sup> (Na <sub>2</sub> SO <sub>4</sub> ) <sub>2</sub> (NaHSO <sub>4</sub> ) |                   |                   |                   |
| Final Gibbs free energy ... -3071.64908432 Eh                                         |                   |                   |                   |
| S                                                                                     | -2.13190068586754 | -0.37557974453286 | 2.76696790566730  |
| O                                                                                     | -2.83721738251901 | -1.03431512990847 | 4.07658866667203  |
| O                                                                                     | -2.93337380770927 | -0.96015537981936 | 1.64524531098278  |
| O                                                                                     | -0.70636537842288 | -0.81455723789660 | 2.72462128627989  |
| O                                                                                     | -2.26567963824542 | 1.10671751066917  | 2.83862437064006  |
| H                                                                                     | -2.35943271593764 | -0.75172770352543 | 4.87489680398701  |

|                                                                                                                      |                   |                   |                   |
|----------------------------------------------------------------------------------------------------------------------|-------------------|-------------------|-------------------|
| Na                                                                                                                   | 2.26703688055469  | 0.97483017369762  | -0.97581718618616 |
| Na                                                                                                                   | -3.23632342858646 | 1.07799783409986  | 0.49333944317588  |
| Na                                                                                                                   | -1.15754576063787 | -1.74690043125152 | 0.33382182709279  |
| Na                                                                                                                   | 0.19762245974522  | 3.64860867551573  | -0.84038422170729 |
| Na                                                                                                                   | 2.40488105938379  | 5.30698806358046  | 2.71080494358375  |
| Na                                                                                                                   | 0.26934301509736  | 1.34826589744924  | 1.97851261680133  |
| S                                                                                                                    | 2.47160427701657  | 3.17178294929441  | 0.91680744050562  |
| O                                                                                                                    | 2.42841063787790  | 3.26258190840275  | -0.60118892578909 |
| O                                                                                                                    | 2.46427866248911  | 1.70460921199766  | 1.29103880413380  |
| O                                                                                                                    | 3.62179629201940  | 3.92312372168225  | 1.50903080888115  |
| O                                                                                                                    | 1.15881897040073  | 3.81268251160019  | 1.45761129804916  |
| S                                                                                                                    | -0.66516482222477 | 0.85792898181436  | -0.86973781090319 |
| O                                                                                                                    | 0.32634503039094  | -0.04503748100200 | -0.12365754017456 |
| O                                                                                                                    | -1.11564083828582 | 1.96861185657072  | 0.10147264396925  |
| O                                                                                                                    | 0.05097983285269  | 1.51077324932846  | -2.01568329686829 |
| O                                                                                                                    | -1.87945082038981 | 0.03522429923445  | -1.21456918577977 |
| Na <sup>+</sup> (Na <sub>2</sub> SO <sub>4</sub> ) <sub>2</sub> (NaHSO <sub>4</sub> )(NH <sub>3</sub> )              |                   |                   |                   |
| Final Gibbs free energy ... -3128.18952330 Eh                                                                        |                   |                   |                   |
| S                                                                                                                    | -1.80350767127860 | 3.09655838039395  | -2.42659340152475 |
| O                                                                                                                    | -2.79780537381580 | 4.27193705098447  | -2.95801173254607 |
| O                                                                                                                    | -1.65114827228821 | 3.43097984824710  | -0.98535083440223 |
| O                                                                                                                    | -2.51297183199842 | 1.77783793792144  | -2.59926281800782 |
| O                                                                                                                    | -0.56274641964003 | 3.12920498794137  | -3.23905691014199 |
| H                                                                                                                    | -2.84026597265084 | 4.23344622100803  | -3.92850182029277 |
| Na                                                                                                                   | 4.45392366814135  | 4.85799036117235  | 0.88314317616793  |
| Na                                                                                                                   | -2.61393848441491 | 1.02386047509915  | -0.41790516634464 |
| Na                                                                                                                   | 0.94616529133541  | 0.65056957825129  | 2.50703868983018  |
| Na                                                                                                                   | 0.43647054634309  | 3.14447765877565  | 0.04319888224649  |
| Na                                                                                                                   | 3.00429530775044  | 0.72393451580442  | -0.17600835498484 |
| S                                                                                                                    | 2.77792171341658  | 2.79761720793017  | 1.85121733608893  |
| O                                                                                                                    | 3.12061747379871  | 1.32340933804846  | 2.01938998050213  |
| O                                                                                                                    | 2.93852472985503  | 3.13512408982238  | 0.33724055221088  |
| O                                                                                                                    | 3.68229008000812  | 3.69593272100442  | 2.62611019457094  |
| O                                                                                                                    | 1.31279484846547  | 2.97218565615142  | 2.20144753169545  |
| S                                                                                                                    | 0.13477756744336  | 0.15887464440904  | -0.28168044307772 |
| O                                                                                                                    | -0.87556798180619 | -0.55988986214871 | -1.13910740064422 |
| O                                                                                                                    | 1.12083560694698  | -0.70720769599785 | 0.44789468058650  |
| O                                                                                                                    | 0.92457901271303  | 1.11463364167680  | -1.19897493587388 |
| O                                                                                                                    | -0.62342967574751 | 1.00554789389900  | 0.74897555232006  |
| Na                                                                                                                   | -0.40393291948953 | 0.69871387964175  | -3.10739131684965 |
| N                                                                                                                    | 5.90465038529434  | 6.77494582298327  | 0.69899138675747  |
| H                                                                                                                    | 5.45804946823704  | 7.62491805639039  | 0.36588555646312  |
| H                                                                                                                    | 6.73140800711557  | 6.66167803292669  | 0.11897080316103  |
| H                                                                                                                    | 6.25647441574944  | 7.00435852111332  | 1.62507972379951  |
| Na <sup>+</sup> (Na <sub>2</sub> SO <sub>4</sub> ) <sub>2</sub> (NaHSO <sub>4</sub> )(NH <sub>3</sub> ) <sub>2</sub> |                   |                   |                   |
| Final Gibbs free energy ... -3184.72638476 Eh                                                                        |                   |                   |                   |
| Na                                                                                                                   | -1.53404575508451 | 5.88243131936309  | -0.36238608268313 |
| Na                                                                                                                   | 2.16239711840679  | 0.34665286046705  | 4.67624166317554  |
| Na                                                                                                                   | -0.18671786942211 | 3.24392944617342  | 2.37590696350535  |
| Na                                                                                                                   | 2.72122313655769  | 4.62192215503192  | 0.93941294852277  |
| Na                                                                                                                   | 1.95447363666328  | 1.39805349483138  | 0.30065668636836  |
| Na                                                                                                                   | -2.21848751637418 | 2.50769118480656  | -1.11515541383432 |
| S                                                                                                                    | -3.34500138698563 | 3.48100658892588  | 1.32074862379282  |
| O                                                                                                                    | -4.78503484533400 | 3.86514207330718  | 1.99284797832672  |

|                                                                        |                   |                       |                   |
|------------------------------------------------------------------------|-------------------|-----------------------|-------------------|
| O                                                                      | -3.16091923666604 | 4.38936582291688      | 0.13201794707645  |
| O                                                                      | -3.42842395566776 | 2.07031112423216      | 0.85622121648210  |
| O                                                                      | -2.39992178149988 | 3.75837704887101      | 2.41998909452406  |
| S                                                                      | 0.37132760318595  | 3.70006205431977      | -0.56723250499806 |
| O                                                                      | -0.17635734428661 | 2.40537311038029      | 0.05945884164906  |
| O                                                                      | 0.35334436098627  | 4.79425115903023      | 0.50678247501373  |
| O                                                                      | 1.79973207402109  | 3.45509921667810      | -0.97196398734063 |
| O                                                                      | -0.55185231930922 | 4.10510845315219      | -1.68886711953510 |
| S                                                                      | 2.63348621135056  | 2.49684373218164      | 2.90240696683812  |
| O                                                                      | 3.45436488551577  | 2.50720232560622      | 1.62171287306171  |
| O                                                                      | 1.49374275127340  | 1.44906704440989      | 2.70608427956396  |
| O                                                                      | 1.97754889191813  | 3.85747717952397      | 3.04011667877538  |
| O                                                                      | 3.42422930030779  | 2.09841414120556      | 4.10302355138453  |
| N                                                                      | 1.89911677568509  | -1.06838824118673     | 6.61154582401133  |
| H                                                                      | 0.94182622256522  | -1.29168322757203     | 6.86943980861053  |
| H                                                                      | 2.37777816368718  | -1.96328241496868     | 6.55681063277351  |
| H                                                                      | 2.29486625783862  | -0.60441781610566     | 7.42527413616077  |
| H                                                                      | -5.49034390764790 | 3.47656704391993      | 1.45001155516820  |
| N                                                                      | -2.24216183730645 | 8.19731809271325      | -0.34459072850832 |
| H                                                                      | -3.25576908502763 | 8.24459433751881      | -0.40294214344502 |
| H                                                                      | -1.89787277729488 | 8.79625572609352      | -1.08947556337890 |
| H                                                                      | -2.00138634754802 | 8.67331411775771      | 0.52054251207223  |
| $\text{Na}^+(\text{Na}_2\text{SO}_4)_2(\text{NaHSO}_4)_2$              |                   |                       |                   |
| Final Gibbs free energy                                                |                   | ... -3933.66253771 Eh |                   |
| S                                                                      | -2.17963297125054 | 1.92076272975912      | 1.19935946057638  |
| O                                                                      | -2.09151311746370 | 2.87052924734661      | 2.51769280557161  |
| O                                                                      | -0.85483418104771 | 2.00763586190429      | 0.50471025461590  |
| O                                                                      | -2.49254705430443 | 0.55141330629187      | 1.68082320429124  |
| O                                                                      | -3.24207658799221 | 2.58876433773587      | 0.40732719875386  |
| H                                                                      | -1.51610457573627 | 2.44983954015897      | 3.17861767988177  |
| S                                                                      | -3.07964509599235 | 4.29579614977856      | -3.78660259012793 |
| O                                                                      | -3.53164862331445 | 5.77799016982367      | -4.29041700930206 |
| O                                                                      | -3.42841257539042 | 3.34759785876372      | -4.87321664234825 |
| O                                                                      | -1.61442805483689 | 4.47339971986961      | -3.55801928807727 |
| O                                                                      | -3.78239311991002 | 4.02233518089689      | -2.49759015948341 |
| H                                                                      | -4.41185735161555 | 5.71882029147265      | -4.69823617926003 |
| Na                                                                     | -1.62864234338774 | 3.12798909656590      | -1.51208868397072 |
| Na                                                                     | -3.14044286269793 | -1.21808352693043     | 0.50478080997708  |
| Na                                                                     | -4.62552197424403 | 2.14358125952567      | -1.35049923643222 |
| Na                                                                     | -2.67802928817033 | 1.18995150994349      | -4.76122566572105 |
| Na                                                                     | 0.53789894681153  | 3.91813965941533      | -4.20610833885326 |
| Na                                                                     | 0.17910588428694  | 0.53427251833370      | -0.90263482039150 |
| Na                                                                     | -0.66665675325571 | -1.38609297805216     | -3.61762546226339 |
| S                                                                      | 0.64784535582031  | 1.18903073917902      | -3.66832780881744 |
| O                                                                      | 0.15175546805139  | 2.17898747027299      | -2.59088539533771 |
| O                                                                      | -0.51805441360934 | 0.74826130427291      | -4.54723744599751 |
| O                                                                      | 1.13392110090168  | -0.05323149251748     | -2.93737500876830 |
| O                                                                      | 1.67180445150864  | 1.90198126049639      | -4.48153045721719 |
| S                                                                      | -2.94424260943426 | -0.20561568709757     | -2.17475388462032 |
| O                                                                      | -1.74534141471271 | -0.76519847820005     | -1.38906111973073 |
| O                                                                      | -4.19130133992612 | -0.40174911266444     | -1.34040156185900 |
| O                                                                      | -2.77983772990884 | 1.28849960728892      | -2.40487783286828 |
| O                                                                      | -2.99161242017603 | -0.88668141463422     | -3.51660103322037 |
| $\text{Na}^+(\text{Na}_2\text{SO}_4)_2(\text{NaHSO}_4)_2(\text{NH}_3)$ |                   |                       |                   |

|                         |                   |                   |                   |
|-------------------------|-------------------|-------------------|-------------------|
| Final Gibbs free energy | ...               | -3990.20004983 Eh |                   |
| S                       | -2.44782142409501 | 1.66894957419431  | 1.30760752315907  |
| O                       | -2.45706208584291 | 2.53358157574133  | 2.68745951535256  |
| O                       | -1.08204719352719 | 1.81296283877255  | 0.70936596756311  |
| O                       | -2.77105883200466 | 0.26848562947371  | 1.68176645483440  |
| O                       | -3.46629105602379 | 2.37465157040799  | 0.49233917807380  |
| H                       | -1.93098073581739 | 2.06831443354908  | 3.35928888482873  |
| S                       | -3.04776585088639 | 4.35272275720170  | -3.55388013791924 |
| O                       | -3.45365837071431 | 5.87251060154298  | -3.98838715264840 |
| O                       | -3.35434866224982 | 3.48073908994271  | -4.71528194397575 |
| O                       | -1.59739933249912 | 4.48831473845003  | -3.23660379139136 |
| O                       | -3.82898898730827 | 4.01394854184842  | -2.32592620999277 |
| H                       | -4.31414315251738 | 5.84992926173761  | -4.43924735142127 |
| Na                      | -1.70120602754402 | 3.05596988126777  | -1.28643023030206 |
| Na                      | -3.36598207878084 | -1.40073850086003 | 0.33521946322393  |
| Na                      | -4.71087316084638 | 2.05433563191995  | -1.39125657324769 |
| Na                      | -2.49168346760178 | 1.36021729039119  | -4.70253337370563 |
| Na                      | 0.67510269534836  | 4.05198334216430  | -3.69964000987735 |
| Na                      | 0.06742689086035  | 0.43548931880988  | -0.70735085975948 |
| Na                      | -0.57607394732397 | -1.30564272060012 | -3.59517395767796 |
| S                       | 0.73518774275019  | 1.25683386974619  | -3.37794238286120 |
| O                       | 0.15352674835777  | 2.17520950482833  | -2.28073581968641 |
| O                       | -0.36023248760129 | 0.87763974448555  | -4.37075924568396 |
| O                       | 1.15736028953075  | -0.03589911324391 | -2.68954499155962 |
| O                       | 1.82452277187875  | 2.00455929484758  | -4.05801436954821 |
| S                       | -2.95999346984987 | -0.22267102281764 | -2.24910636437758 |
| O                       | -1.82680119267828 | -0.83351433309108 | -1.40702161091251 |
| O                       | -4.26951994458746 | -0.47062219590827 | -1.52964626047218 |
| O                       | -2.78585545531857 | 1.28265798689531  | -2.36830581017669 |
| O                       | -2.89945365219555 | -0.81517198240201 | -3.63141792113148 |
| N                       | 2.05171884967564  | 5.91293265328737  | -4.37476296198320 |
| H                       | 2.60789618739308  | 6.32331058994762  | -3.63040267749316 |
| H                       | 1.56889096357287  | 6.69060756033639  | -4.81505153704943 |
| H                       | 2.72310416148562  | 5.57921947717196  | -5.06095207477778 |

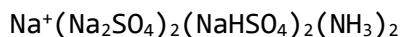

|                         |                   |                   |                   |
|-------------------------|-------------------|-------------------|-------------------|
| Final Gibbs free energy | ...               | -4046.74204935 Eh |                   |
| Na                      | 4.81428487263424  | -1.31320623832738 | -2.28646003393338 |
| Na                      | 2.47141526723765  | -0.43932138556129 | 0.41901235301336  |
| Na                      | 4.35924673408480  | 1.89431883341954  | -1.68877700388117 |
| Na                      | 0.52607248865693  | -2.75570095219923 | 2.50563389821848  |
| Na                      | -0.20808041490178 | 1.16580502495478  | -1.41601806157680 |
| Na                      | 0.18688588138897  | 0.44507437532204  | 3.17407087093977  |
| Na                      | 5.10405407537232  | -2.06614202228463 | 2.27797117849623  |
| S                       | 5.47479727874675  | -0.01224472833278 | 0.22673937592035  |
| O                       | 6.14305416260228  | 0.33242188743212  | -1.08536081097742 |
| O                       | 4.83354430665571  | -1.39449703525899 | 0.07594056584656  |
| O                       | 6.39397951875136  | -0.07310000112657 | 1.43479834992705  |
| O                       | 4.39319856330798  | 1.02524367577534  | 0.48644710098329  |
| S                       | 2.26281835680932  | 0.08659199535972  | -2.56118358016400 |
| O                       | 2.51164206698413  | -1.24714690303648 | -1.87370153301293 |
| O                       | 0.94884817436520  | 0.00957262489152  | -3.32022303148751 |
| O                       | 2.11052150452942  | 1.18667760081357  | -1.50706822635700 |
| O                       | 3.48122238001508  | 0.41332350235245  | -3.39561526878817 |
| S                       | -0.61259052655479 | -0.81778092978165 | 0.65390810679587  |

|                                                                                                    |                   |                   |                   |
|----------------------------------------------------------------------------------------------------|-------------------|-------------------|-------------------|
| O                                                                                                  | -1.59496941829169 | -0.57517087449548 | -0.45227043051529 |
| O                                                                                                  | 0.30151281729346  | -1.99896117125089 | 0.27323105991570  |
| O                                                                                                  | -1.19027870882758 | -1.13158483773315 | 2.01541499997636  |
| O                                                                                                  | 0.25845846472951  | 0.43622863124178  | 0.80273887672837  |
| N                                                                                                  | -0.16826099153123 | -2.35390321734531 | -2.38799346088169 |
| H                                                                                                  | 0.20327286361161  | -3.19713031487637 | -2.81655658544402 |
| H                                                                                                  | -1.18485871389470 | -2.34020193136891 | -2.44616447321993 |
| H                                                                                                  | 0.23629640455259  | -1.50654215690003 | -2.86456807128571 |
| H                                                                                                  | 0.09970888442090  | -2.29968370390462 | -1.36173081848703 |
| S                                                                                                  | 2.68082729012743  | -1.01768980445041 | 3.46942835857465  |
| O                                                                                                  | 2.73472446369448  | -1.94761269173445 | 2.24869259440820  |
| O                                                                                                  | 1.42173273310965  | -1.35312046767914 | 4.23558018267132  |
| O                                                                                                  | 2.53066991764906  | 0.43012868312931  | 2.97005728897136  |
| O                                                                                                  | 3.97558005575744  | -1.15800118707803 | 4.21405911070953  |
| N                                                                                                  | 5.05434931557216  | 1.44137680797246  | 3.32685386958405  |
| H                                                                                                  | 5.19825448531171  | 2.44600280545149  | 3.27632642918360  |
| H                                                                                                  | 5.24400410544574  | 1.09488181484415  | 4.26601713014259  |
| H                                                                                                  | 4.05485424824648  | 1.18470118381258  | 3.09432465660938  |
| H                                                                                                  | 5.67296909233899  | 0.95087767995252  | 2.62860585239454  |
| Na <sup>+</sup> (Na <sub>2</sub> SO <sub>4</sub> ) <sub>2</sub> (NaHSO <sub>4</sub> ) <sub>3</sub> |                   |                   |                   |
| Final Gibbs free energy ... -4795.66343694 Eh                                                      |                   |                   |                   |
| S                                                                                                  | -2.24302145887175 | -3.54658757755395 | -1.61287058366655 |
| O                                                                                                  | -3.59924682086114 | -4.44461329430700 | -1.74826022516065 |
| O                                                                                                  | -1.22988302753374 | -4.57938740763410 | -1.28744032816079 |
| O                                                                                                  | -2.04732151646368 | -2.85023543286658 | -2.90696386560100 |
| O                                                                                                  | -2.48976097562369 | -2.58243832799140 | -0.49118726581777 |
| H                                                                                                  | -4.31176240661545 | -3.89426069032782 | -2.11491778906588 |
| Na                                                                                                 | 1.06755878576756  | -4.27615726169015 | -1.02988795649612 |
| Na                                                                                                 | -1.12714399519913 | -0.68195487634571 | -0.33274375286537 |
| Na                                                                                                 | -2.16831940760253 | 1.51678598073737  | 2.42900997092216  |
| Na                                                                                                 | -2.32203594629280 | -3.06601717119219 | 1.77325704451026  |
| Na                                                                                                 | 1.01793856357569  | -1.27841879396540 | 1.76501433531022  |
| Na                                                                                                 | -0.11613445792840 | -3.46515515629410 | 4.48012063395234  |
| Na                                                                                                 | 1.98779403334333  | 1.38320758677801  | -1.64819605764471 |
| Na                                                                                                 | -0.31157756241617 | -1.92349627938018 | -3.94955105395643 |
| S                                                                                                  | 0.10148455339808  | -4.98532090456910 | 1.94081670419041  |
| O                                                                                                  | -1.46240948284181 | -5.37300689679359 | 1.50064079780413  |
| O                                                                                                  | 0.97133735057495  | -5.55186253869923 | 0.89053823396992  |
| O                                                                                                  | 0.08141601355991  | -3.47997589536533 | 1.95185476743843  |
| O                                                                                                  | 0.22779645338206  | -5.51256771082251 | 3.31090511514432  |
| S                                                                                                  | -1.32078642101248 | -1.00270414236511 | 3.56316999754617  |
| O                                                                                                  | -1.43327495001671 | -0.81167275233885 | 2.01871043098552  |
| O                                                                                                  | 0.14954321462882  | -1.18754778451480 | 3.90056200887855  |
| O                                                                                                  | -1.91075416494785 | 0.20398602979797  | 4.20891431730933  |
| O                                                                                                  | -2.05026646119749 | -2.28558070205121 | 3.91772254973470  |
| S                                                                                                  | 1.42916418882273  | -1.44126899351487 | -1.73304050393637 |
| O                                                                                                  | 1.46897611609256  | -2.61206135525923 | -2.69827678559048 |
| O                                                                                                  | 2.73931615144617  | -0.74661539494070 | -1.58801989930296 |
| O                                                                                                  | 0.92201610797555  | -1.98827576291217 | -0.39936712717630 |
| O                                                                                                  | 0.37754874620111  | -0.42849270899923 | -2.24753463440429 |
| S                                                                                                  | 0.02617707238704  | 2.04438625353055  | 0.40625837436793  |
| O                                                                                                  | 0.60669077968069  | 2.98181950301222  | -0.57440295378401 |
| O                                                                                                  | -0.16133430894334 | 2.83927396029304  | 1.85494406966856  |
| O                                                                                                  | 0.93818851780320  | 0.88761927597107  | 0.66014673920182  |

|                                                                                                                                    |                   |                   |                   |
|------------------------------------------------------------------------------------------------------------------------------------|-------------------|-------------------|-------------------|
| O                                                                                                                                  | -1.38774435379571 | 1.64163986303371  | 0.17868689153635  |
| H                                                                                                                                  | -1.46870729947167 | -5.48161640881766 | 0.52619122260564  |
| H                                                                                                                                  | 0.69697457492812  | 3.14881629507639  | 2.18844676646987  |
| Na <sup>+</sup> (Na <sub>2</sub> SO <sub>4</sub> ) <sub>2</sub> (NaHSO <sub>4</sub> ) <sub>3</sub> (NH <sub>3</sub> )              |                   |                   |                   |
| Final Gibbs free energy                                                                                                            |                   | ...               | -4852.20837087 Eh |
| S                                                                                                                                  | -3.39636813525390 | -0.95755054477149 | -3.26152565533011 |
| O                                                                                                                                  | -1.93668538799610 | -1.09244607506188 | -4.02853292064256 |
| O                                                                                                                                  | -4.02840026754939 | 0.18859266726583  | -3.93969143489564 |
| O                                                                                                                                  | -4.05147236953721 | -2.27690393105474 | -3.37896350063428 |
| O                                                                                                                                  | -3.06030525380071 | -0.68173962027029 | -1.81423684759349 |
| H                                                                                                                                  | -1.34062168255534 | -1.63703534551817 | -3.43969629767337 |
| S                                                                                                                                  | -2.57689772882248 | 3.51876425456899  | 0.17878621702218  |
| O                                                                                                                                  | -3.66099363086260 | 3.83444927893195  | 1.35136752735698  |
| O                                                                                                                                  | -1.94565353710602 | 2.21060857351085  | 0.49452741191696  |
| O                                                                                                                                  | -3.42061412375876 | 3.56740387905793  | -1.04530635141600 |
| O                                                                                                                                  | -1.55656253152113 | 4.61877673688863  | 0.17955287946948  |
| H                                                                                                                                  | -3.23226441983595 | 3.73465423691554  | 2.21813140672976  |
| Na                                                                                                                                 | -3.54318205289457 | 2.19957767583009  | -2.96756419374904 |
| Na                                                                                                                                 | 0.40764009906654  | 3.17610683143357  | -0.30121525644264 |
| Na                                                                                                                                 | -3.17686329367490 | -3.09553275169461 | -1.33094243499042 |
| Na                                                                                                                                 | 0.03476273352446  | 0.29446361189571  | -3.74869821308098 |
| Na                                                                                                                                 | 1.40696328717833  | -1.14004967507901 | 0.84076021382465  |
| Na                                                                                                                                 | -1.97317565556560 | 5.32216544973593  | -2.06328228823455 |
| Na                                                                                                                                 | 2.49604917842898  | -1.73389958569288 | -2.19319349951377 |
| Na                                                                                                                                 | -1.33569158719492 | 0.33857009629192  | -0.76536510131424 |
| S                                                                                                                                  | 2.18809740527985  | 0.93707212435543  | -1.14210522597641 |
| O                                                                                                                                  | 3.08339353434757  | -0.10515835726529 | -0.51583685544169 |
| O                                                                                                                                  | 2.01263849831506  | 0.57727205229920  | -2.61111665691904 |
| O                                                                                                                                  | 2.70705000706856  | 2.35895278672860  | -1.04878205902097 |
| O                                                                                                                                  | 0.86257229325856  | 0.90228710004374  | -0.37925258859975 |
| S                                                                                                                                  | -0.74652444182033 | 3.08543290186556  | -3.33712502328329 |
| O                                                                                                                                  | -1.97461272476390 | 3.79843333801422  | -3.84921904200334 |
| O                                                                                                                                  | 0.17931692471858  | 2.61653807956665  | -4.43871926742001 |
| O                                                                                                                                  | 0.00319588721962  | 4.03213574822415  | -2.40672131746400 |
| O                                                                                                                                  | -1.21069854812854 | 1.85352340006604  | -2.56056222296999 |
| S                                                                                                                                  | -0.12708025009170 | -2.56368473422526 | -1.11395347644299 |
| O                                                                                                                                  | 1.28067713692773  | -2.95054105282278 | -0.69915314424586 |
| O                                                                                                                                  | 0.03199249334613  | -1.67839308585578 | -2.37683025765966 |
| O                                                                                                                                  | -0.72189972161303 | -1.72158704468886 | 0.00840549926532  |
| O                                                                                                                                  | -1.01844665724302 | -3.71534367897826 | -1.42842684487384 |
| N                                                                                                                                  | 2.70778395266640  | 3.34349582866581  | -3.59941842792797 |
| H                                                                                                                                  | 1.76641682599007  | 3.07081147684981  | -3.99015202390767 |
| H                                                                                                                                  | 2.75377671212561  | 3.00106402709558  | -2.59715113218917 |
| H                                                                                                                                  | 2.80316566848968  | 4.35550188169086  | -3.63178987155994 |
| H                                                                                                                                  | 3.45328111463820  | 2.91024500518915  | -4.13858936916689 |
| Na <sup>+</sup> (Na <sub>2</sub> SO <sub>4</sub> ) <sub>2</sub> (NaHSO <sub>4</sub> ) <sub>3</sub> (NH <sub>3</sub> ) <sub>2</sub> |                   |                   |                   |
| Final Gibbs free energy                                                                                                            |                   | ...               | -4908.74845768 Eh |
| Na                                                                                                                                 | -2.19122724827909 | 1.19494727608390  | -0.22297199041299 |
| Na                                                                                                                                 | 1.79083471894666  | 0.35806727449384  | -0.57957976095609 |
| Na                                                                                                                                 | 4.51752609812908  | -1.01010139395958 | 0.89116030311020  |
| Na                                                                                                                                 | 1.27534575990810  | -3.02562516401159 | -1.17084978777797 |
| Na                                                                                                                                 | -0.74276335458856 | -3.28185456007733 | 1.52061182069876  |
| Na                                                                                                                                 | 3.17994025340490  | 3.41812557224425  | -0.21494962230839 |
| Na                                                                                                                                 | 0.45382980351964  | -0.06430690242332 | 1.96805152684751  |

|                                                                          |                   |                       |                   |
|--------------------------------------------------------------------------|-------------------|-----------------------|-------------------|
| Na                                                                       | 3.07754641510137  | -1.07368392705132     | 3.96776618854857  |
| S                                                                        | 3.44396675143014  | 1.39236224024529      | 2.38366627754109  |
| O                                                                        | 3.30847105240574  | 1.31807270205285      | 0.86096538387094  |
| O                                                                        | 3.76111979776138  | 2.82345992708647      | 2.74781738385947  |
| O                                                                        | 4.50320299944808  | 0.40408109595407      | 2.80952057801382  |
| O                                                                        | 2.13856478753330  | 0.97587038102012      | 3.06722000294062  |
| S                                                                        | 0.18614523517331  | 2.90637027134226      | -0.27399365154281 |
| O                                                                        | -0.00069582769262 | 1.71749634298216      | 0.66891954060545  |
| O                                                                        | 0.79111477262931  | 4.07242700113993      | 0.49396454823414  |
| O                                                                        | 1.22901874091972  | 2.51034094297504      | -1.33443514688706 |
| O                                                                        | -1.13143052462764 | 3.20098832143054      | -0.90582000917066 |
| S                                                                        | 3.81455967607617  | -1.22145071573553     | -2.45461168440974 |
| O                                                                        | 4.79189762162827  | -1.22733848542391     | -1.33890264840501 |
| O                                                                        | 4.67296829185346  | -1.14079478435780     | -3.84657398058072 |
| O                                                                        | 2.98593939529655  | -2.45033520949553     | -2.53567735995714 |
| O                                                                        | 3.01923857035907  | 0.04322047041207      | -2.52665748853855 |
| S                                                                        | 2.06571977261947  | -2.58030333804039     | 1.73796219825932  |
| O                                                                        | 1.51518464852949  | -3.82169183674824     | 1.08896341887480  |
| O                                                                        | 2.12197162748758  | -1.47708203597989     | 0.67680494312185  |
| O                                                                        | 1.09757794669874  | -2.12562035962367     | 2.83918195071335  |
| O                                                                        | 3.44408550360370  | -2.71981985159972     | 2.32383488005801  |
| S                                                                        | -1.20600168185812 | -1.43975536082136     | -0.73007299582605 |
| O                                                                        | -1.19601971050024 | -1.02574437197550     | 0.75098136956296  |
| O                                                                        | -2.39200555289731 | -0.81867372245133     | -1.38782609247866 |
| O                                                                        | 0.06884267619409  | -0.90787887018100     | -1.41614921367934 |
| O                                                                        | -1.12776643509788 | -2.94651777198379     | -0.77115260243139 |
| N                                                                        | 0.47845229055435  | 0.81549591887412      | -3.44806009807485 |
| H                                                                        | 5.19812783040828  | -1.95399531935639     | -3.93027366024157 |
| H                                                                        | 1.43108037951303  | 0.49350016029725      | -3.66919261451632 |
| H                                                                        | -0.08015366674641 | 0.97568333263014      | -4.28153843441122 |
| H                                                                        | 0.06459985996089  | 0.07897534232112      | -2.81733191942317 |
| H                                                                        | 0.58190925852361  | 1.67417837251189      | -2.86846629076907 |
| N                                                                        | 1.31206135817305  | 3.88149142051770      | 3.13524862258783  |
| H                                                                        | 0.97417929010866  | 3.95994381984845      | 2.13087469644475  |
| H                                                                        | 0.80996703347909  | 3.12967500944487      | 3.60198364860873  |
| H                                                                        | 2.33244226090971  | 3.58071711822584      | 3.10084379620898  |
| H                                                                        | 1.18437840495520  | 4.75744013610165      | 3.63507503872216  |
| $\text{Na}^+(\text{Na}_2\text{SO}_4)_2(\text{NaHSO}_4)_3(\text{NH}_3)_3$ |                   |                       |                   |
| Final Gibbs free energy                                                  |                   | ... -4965.28898640 Eh |                   |
| Na                                                                       | -2.30068480296320 | 1.01103583336857      | -0.07373486554719 |
| Na                                                                       | 1.70133822187632  | 0.43737863708375      | -0.64361975393128 |
| Na                                                                       | 4.53367829681025  | -0.76116812369087     | 0.77122846792444  |
| Na                                                                       | 1.38603422484464  | -2.98065135358951     | -1.19814417811220 |
| Na                                                                       | -0.52938056470321 | -3.35754761907720     | 1.55487162604411  |
| Na                                                                       | 2.87465810882783  | 3.50071714099581      | -0.14243287193372 |
| Na                                                                       | 0.49645605825019  | -0.08483998919931     | 1.96535602151569  |
| Na                                                                       | 3.21889251671458  | -0.92794319871286     | 3.89197325441342  |
| S                                                                        | 3.36231506088364  | 1.54058524199902      | 2.28360343919140  |
| O                                                                        | 3.17594313095620  | 1.35957010423686      | 0.78215280136003  |
| O                                                                        | 3.57443483356109  | 3.01602947964283      | 2.53843044958386  |
| O                                                                        | 4.51473923815568  | 0.66500578575153      | 2.71622626815165  |
| O                                                                        | 2.12441855749200  | 1.06672989025557      | 3.05197098309563  |
| S                                                                        | -0.04063733446966 | 2.86504914454092      | -0.22693946167164 |
| O                                                                        | -0.11820314468593 | 1.66335020575113      | 0.71634823287153  |

|                                                                                                    |                   |                   |                   |
|----------------------------------------------------------------------------------------------------|-------------------|-------------------|-------------------|
| O                                                                                                  | 0.55092876178855  | 4.04996623591202  | 0.51916213229572  |
| O                                                                                                  | 0.95971142635050  | 2.52719264059332  | -1.34186566247552 |
| O                                                                                                  | -1.40582603596532 | 3.09547416751642  | -0.78150178499531 |
| S                                                                                                  | 3.76747814524171  | -0.97793150889630 | -2.56859746371651 |
| O                                                                                                  | 4.77635897151763  | -0.82249953976112 | -1.49022135823758 |
| O                                                                                                  | 4.57088537105126  | -0.87281313502318 | -3.99255741118097 |
| O                                                                                                  | 3.06952650708074  | -2.28569939648646 | -2.56404871062415 |
| O                                                                                                  | 2.84606956767592  | 0.19739250471303  | -2.66716178602098 |
| S                                                                                                  | 2.23454905963528  | -2.50430768623023 | 1.67663099566024  |
| O                                                                                                  | 1.74701127293302  | -3.79094546987406 | 1.06674714274493  |
| O                                                                                                  | 2.17079501376450  | -1.42045983328316 | 0.59699808868066  |
| O                                                                                                  | 1.28188239115049  | -2.10096278735208 | 2.81116036749108  |
| O                                                                                                  | 3.64113989933418  | -2.53501315983127 | 2.21212271236998  |
| S                                                                                                  | -1.17965737202823 | -1.55015412275518 | -0.67504453492903 |
| O                                                                                                  | -1.14140791259086 | -1.14032705917239 | 0.80710747510819  |
| O                                                                                                  | -2.42395202686894 | -0.99662416948753 | -1.28422884849113 |
| O                                                                                                  | 0.03335083584627  | -0.94252359520175 | -1.40810178787017 |
| O                                                                                                  | -1.01159529168577 | -3.04944965836212 | -0.72431329775064 |
| N                                                                                                  | 0.16339762275933  | 0.86361092846978  | -3.40704291543011 |
| H                                                                                                  | 5.16204889246478  | -1.64014856755091 | -4.06963033141400 |
| H                                                                                                  | 1.07486665393741  | 0.60639291268076  | -3.79841321932466 |
| H                                                                                                  | -0.52060861052263 | 1.05783339652255  | -4.13311294181803 |
| H                                                                                                  | -0.13095138068405 | 0.06954879722189  | -2.77806170394450 |
| H                                                                                                  | 0.31753615834181  | 1.68730989429353  | -2.77734468342042 |
| N                                                                                                  | 1.11183324189805  | 3.91488405591867  | 3.14621772420653  |
| H                                                                                                  | 0.73046799216030  | 3.97867743923255  | 2.15630949545016  |
| H                                                                                                  | 0.68030427570168  | 3.12922393317955  | 3.62744704731842  |
| H                                                                                                  | 2.14314548735470  | 3.67630267003461  | 3.05204630683480  |
| H                                                                                                  | 0.95777544885202  | 4.77788745998430  | 3.66060127218830  |
| N                                                                                                  | 4.49906136597314  | 2.95196603027752  | -1.83008555345903 |
| H                                                                                                  | 4.77138739909743  | 3.56344253299795  | -2.59304199702623 |
| H                                                                                                  | 4.08608736423412  | 2.12628665738629  | -2.26264350707091 |
| H                                                                                                  | 5.36632210265033  | 2.62695225297669  | -1.41274067410487 |
| Na <sup>+</sup> (Na <sub>2</sub> SO <sub>4</sub> ) <sub>2</sub> (NaHSO <sub>4</sub> ) <sub>4</sub> |                   |                   |                   |
| Final Gibbs free energy                                                                            |                   | ...               | -5657.67622398 Eh |
| S                                                                                                  | -0.35219324046001 | 1.70524983174389  | 0.33863837106255  |
| O                                                                                                  | 0.79727620469711  | 0.78224826759403  | 0.20261834107085  |
| O                                                                                                  | 0.20408217266085  | 3.04881639292402  | 1.08181209355260  |
| O                                                                                                  | -0.92004346186971 | 2.14795811506866  | -0.97968347400511 |
| O                                                                                                  | -1.42973791398379 | 1.26108071708653  | 1.26331265833521  |
| H                                                                                                  | 1.01737620852208  | 3.33774735606779  | 0.63505372112612  |
| S                                                                                                  | 1.35333938414858  | -0.60200278814523 | -4.32781990439391 |
| O                                                                                                  | 1.83461740677605  | 0.66352204084997  | -5.25626399544291 |
| O                                                                                                  | 1.51531489638604  | -0.03172586879453 | -2.96092736044932 |
| O                                                                                                  | -0.08910152280430 | -0.82365990510588 | -4.64929808770721 |
| O                                                                                                  | 2.24276422584385  | -1.73394513839821 | -4.67143648835881 |
| H                                                                                                  | 1.87204011830221  | 0.37467556233322  | -6.18340556056666 |
| S                                                                                                  | -3.78753306771844 | -3.99253110601516 | 1.74782282618029  |
| O                                                                                                  | -4.43965470800541 | -4.76302399546773 | 3.02983052160790  |
| O                                                                                                  | -4.91416201079337 | -3.37412823769854 | 1.01028319906765  |
| O                                                                                                  | -2.82956607483096 | -3.06082182478101 | 2.40498953220333  |
| O                                                                                                  | -3.05171301999434 | -5.02832489198971 | 0.94836401456412  |
| H                                                                                                  | -5.21752189997042 | -5.26524040911518 | 2.73469561118272  |
| Na                                                                                                 | -2.07995010128118 | -0.79731839216554 | 2.15621499075853  |

|                                                                                                                       |                   |                       |                   |
|-----------------------------------------------------------------------------------------------------------------------|-------------------|-----------------------|-------------------|
| Na                                                                                                                    | -0.72965933178089 | 1.01663659563539      | -3.03721338582027 |
| Na                                                                                                                    | 2.41658948604473  | -3.74363877636192     | -3.73049350257626 |
| Na                                                                                                                    | -1.46545422780377 | -2.39496188426535     | -3.54326097035273 |
| Na                                                                                                                    | -3.09980527049024 | 1.25616049816010      | -0.92957702541271 |
| Na                                                                                                                    | -0.85648483182501 | -4.14780916985338     | 1.15696045558497  |
| Na                                                                                                                    | -4.92834890769566 | -1.97291061717192     | -0.81583145228386 |
| Na                                                                                                                    | 0.88130698212162  | -1.17348580084864     | -1.02833179009558 |
| Na                                                                                                                    | -2.49269261591852 | -5.13532926350425     | -1.31292295084920 |
| S                                                                                                                     | -3.98822527995868 | 0.03842645937193      | -3.52028714241120 |
| O                                                                                                                     | -3.39417459883903 | -1.16808160009600     | -4.13436697822558 |
| O                                                                                                                     | -4.75895200808031 | -0.19201238761677     | -2.26275451359815 |
| O                                                                                                                     | -3.02759315414332 | 1.17483501900147      | -3.33783904731572 |
| O                                                                                                                     | -5.15206529966367 | 0.56420186635365      | -4.53833593460019 |
| S                                                                                                                     | 0.17771213122992  | -4.57302259616399     | -2.19974580816873 |
| O                                                                                                                     | -0.20649065980799 | -4.97720506946540     | -0.78615737620811 |
| O                                                                                                                     | -1.07774689437826 | -4.66445263534156     | -3.05716269937161 |
| O                                                                                                                     | 0.64302156196420  | -3.10233446707055     | -2.23604410290706 |
| O                                                                                                                     | 1.29180493577188  | -5.41050135474064     | -2.73640357192079 |
| S                                                                                                                     | -2.04802989007681 | -1.61529795011928     | -0.61255507589481 |
| O                                                                                                                     | -1.42097888481229 | -0.76119749417079     | -1.68748660681609 |
| O                                                                                                                     | -0.96747201657582 | -1.99435247994501     | 0.38492221522197  |
| O                                                                                                                     | -3.12725465050175 | -0.82579574599668     | 0.11707168354668  |
| O                                                                                                                     | -2.70342334094190 | -2.81813636051915     | -1.24755450402416 |
| H                                                                                                                     | -4.79970011792576 | 0.55618926011976      | -5.44388983261039 |
| Na <sup>+</sup> (Na <sub>2</sub> SO <sub>4</sub> ) <sub>2</sub> (NaHSO <sub>4</sub> ) <sub>4</sub> (NH <sub>3</sub> ) |                   |                       |                   |
| Final Gibbs free energy                                                                                               |                   |                       |                   |
| S                                                                                                                     | -1.90396399970968 | ... -5714.21231196 Eh | 3.28093466882955  |
| O                                                                                                                     | -2.58939315756533 |                       | -0.29322366638025 |
| O                                                                                                                     | -2.29516985672871 |                       | 4.76839495533225  |
| O                                                                                                                     | -2.41770820965845 |                       | -0.26808138287103 |
| O                                                                                                                     | -0.45915905101724 |                       | 2.65794375602505  |
| H                                                                                                                     | -3.52717045048271 |                       | -1.57798713730527 |
| S                                                                                                                     | -4.19749921874643 |                       | 0.91177694273649  |
| O                                                                                                                     | -5.63475779504205 |                       | 2.54876475224628  |
| O                                                                                                                     | -3.91484659047515 |                       | 3.60187144558941  |
| O                                                                                                                     | -3.22661313482817 |                       | -0.14192856912842 |
| O                                                                                                                     | -4.43405207920527 |                       | 4.68073462262813  |
| H                                                                                                                     | -5.98252285916336 |                       | -0.50716070376466 |
| S                                                                                                                     | -0.32459627906821 |                       | -1.62514786022352 |
| O                                                                                                                     | -0.25329672611904 |                       | -1.44131362995669 |
| O                                                                                                                     | 0.95609253506817  |                       | -0.22333817634104 |
| O                                                                                                                     | -1.49105645667551 |                       | -2.08093407124028 |
| O                                                                                                                     | -0.44490883499449 |                       | -2.59765196424974 |
| H                                                                                                                     | -0.94511368444512 |                       | -2.32019403119099 |
| S                                                                                                                     | 4.20492498108527  |                       | -0.85341999768229 |
| O                                                                                                                     | 5.69425206910171  |                       | -0.32338597275210 |
| O                                                                                                                     | 4.32597076247575  |                       | -1.10319494631097 |
| O                                                                                                                     | 3.38439033197125  |                       | 0.07962406269622  |
| O                                                                                                                     | 3.80918373311701  |                       | -2.08388322626874 |
| H                                                                                                                     | 6.34616817313483  |                       | -1.98769632383854 |
| Na                                                                                                                    | -1.93040353923916 |                       | 0.25923595278548  |
| Na                                                                                                                    | 2.68610297049494  |                       | 0.67000124317814  |
| Na                                                                                                                    | -3.08216304929847 |                       | 0.05076263163087  |
| Na                                                                                                                    | -0.90384134057284 |                       | 1.41665985431976  |
|                                                                                                                       |                   |                       | -0.98451709671966 |
|                                                                                                                       |                   |                       | 0.06972538881052  |
|                                                                                                                       |                   |                       | -1.83736268364448 |
|                                                                                                                       |                   |                       | 0.45388758055745  |
|                                                                                                                       |                   |                       | -2.20048601524968 |
|                                                                                                                       |                   |                       | -0.23655650590465 |
|                                                                                                                       |                   |                       | 1.32713559544852  |
|                                                                                                                       |                   |                       | -3.20646602484127 |
|                                                                                                                       |                   |                       | -3.50885759762220 |
|                                                                                                                       |                   |                       | -0.11241391238730 |
|                                                                                                                       |                   |                       | -2.32839028487154 |

|                                                                          |                   |                       |                   |
|--------------------------------------------------------------------------|-------------------|-----------------------|-------------------|
| Na                                                                       | 1.89488410435366  | -0.04103043208924     | -3.54424176162786 |
| Na                                                                       | 1.58136101200751  | 2.95822865807093      | -1.36826809223269 |
| Na                                                                       | 2.29141203800770  | -2.63253912729787     | -1.88054867782823 |
| Na                                                                       | -0.29812455758953 | 1.91818956488022      | 1.84646460468692  |
| Na                                                                       | -2.90854823268866 | 0.27738120351003      | 1.05007013827200  |
| S                                                                        | -0.32215794588147 | -2.74239703282088     | -3.05857574696142 |
| O                                                                        | 0.17434234141317  | -3.50454972506728     | -1.83661426218050 |
| O                                                                        | -1.40121995327713 | -1.75373312466479     | -2.56791306194209 |
| O                                                                        | 0.86338552221228  | -1.99507047973927     | -3.64377442657721 |
| O                                                                        | -0.96099406827728 | -3.64548272337673     | -4.06273002348313 |
| S                                                                        | 0.57675467501839  | 0.33636017702851      | -0.59440515135029 |
| O                                                                        | 0.47530314747214  | 0.88391966865593      | -2.00627165354852 |
| O                                                                        | 1.31046617983812  | -0.98325589496708     | -0.53654010373067 |
| O                                                                        | 1.33113607362014  | 1.33465074582690      | 0.27002705127990  |
| O                                                                        | -0.82569585991425 | 0.14802274211911      | -0.05814350576122 |
| N                                                                        | 1.66073432587944  | 5.30475739704686      | -1.91767291728470 |
| H                                                                        | 1.58940987736751  | 5.60366859296328      | -2.88536939833211 |
| H                                                                        | 2.41067312200893  | 5.86062171415859      | -1.51780488301098 |
| H                                                                        | 0.80551582041177  | 5.61898858598966      | -1.46491974570513 |
| $\text{Na}^+(\text{Na}_2\text{SO}_4)_2(\text{NaHSO}_4)_4(\text{NH}_3)_2$ |                   |                       |                   |
| Final Gibbs free energy                                                  |                   | ... -5770.74938678 Eh |                   |
| S                                                                        | -1.72019291205049 | -1.75700193696255     | 3.46012257970906  |
| O                                                                        | -1.31938124727233 | -1.34159951937866     | 1.99749992540350  |
| O                                                                        | -0.83669429541716 | -2.93587888283797     | 3.78459781149656  |
| O                                                                        | -1.34425534643520 | -0.61552535067117     | 4.38079171794779  |
| O                                                                        | -3.17462498017494 | -2.05408194157638     | 3.46621254003996  |
| H                                                                        | -2.33454505722261 | -0.78060554900054     | 1.27447040381543  |
| S                                                                        | -1.89439069222932 | -3.52849913526135     | -0.88341844236663 |
| O                                                                        | -2.27652765760932 | -4.84828228863245     | -1.76917463844818 |
| O                                                                        | -1.83376442447405 | -2.36984183428548     | -1.82806382158910 |
| O                                                                        | -2.97115894030300 | -3.51592043722597     | 0.11461481262075  |
| O                                                                        | -0.51817955405420 | -3.76654847916049     | -0.32471542874975 |
| H                                                                        | -1.66232804817262 | -4.92093759060752     | -2.51783957278132 |
| Na                                                                       | 0.11211861271604  | 0.28435312885387      | 1.25495793829836  |
| Na                                                                       | 0.25899082792126  | -3.37135091615870     | 1.79958944602031  |
| Na                                                                       | -2.12641425184168 | 1.47666358284032      | 3.86775811729196  |
| Na                                                                       | 3.53681924265880  | -0.39189573442294     | -0.38067512479871 |
| Na                                                                       | 0.53989314747919  | -1.85703055234825     | -1.29375606802184 |
| Na                                                                       | 0.62479091587065  | 3.85463946935268      | -0.70389830213041 |
| Na                                                                       | -3.46216720167503 | 3.36596562665657      | 1.07135371949512  |
| Na                                                                       | 0.88429608290089  | -1.58770378225789     | 4.62011127403066  |
| Na                                                                       | -4.35698633128696 | -2.42545345729432     | 1.55883809893862  |
| S                                                                        | 1.22578315680923  | 0.99490669750339      | -1.44124139817581 |
| O                                                                        | 2.05300464018621  | -0.09300609464718     | -2.09773322010416 |
| O                                                                        | 0.97771752758455  | 2.19118518185102      | -2.29583681922603 |
| O                                                                        | -0.11007287078096 | 0.34149581185450      | -1.04069205725447 |
| O                                                                        | 1.93524677408892  | 1.41885341937793      | -0.14539141760442 |
| S                                                                        | -0.71621515307990 | 3.32206904475483      | 1.86583713876369  |
| O                                                                        | -0.34358060151465 | 2.02947885531761      | 2.57798669325900  |
| O                                                                        | 0.55505666797079  | 4.15170836709552      | 1.71943405627991  |
| O                                                                        | -1.22538451115869 | 3.02198612489866      | 0.45128022353577  |
| O                                                                        | -1.81905567889329 | 3.99295886055689      | 2.63613048419316  |
| S                                                                        | -4.21245270128083 | 0.55523769377204      | 1.06443463881515  |
| O                                                                        | -5.37013269116722 | -0.31325370861258     | 1.35374989194618  |

|                                                                                                                                    |                   |                   |                   |
|------------------------------------------------------------------------------------------------------------------------------------|-------------------|-------------------|-------------------|
| O                                                                                                                                  | -4.40517777495151 | 1.50888024086649  | -0.08623893875235 |
| O                                                                                                                                  | -3.69625677076325 | 1.31737113155769  | 2.25120552618566  |
| O                                                                                                                                  | -3.05152171469811 | -0.42925734479216 | 0.54526073841288  |
| S                                                                                                                                  | 2.44142316006022  | -1.36297573211914 | 2.11844621281882  |
| O                                                                                                                                  | 2.27603246506921  | -2.59794625890364 | 2.96140238774671  |
| O                                                                                                                                  | 3.84967250918020  | -0.99192196034205 | 1.78364835578065  |
| O                                                                                                                                  | 1.75980461768743  | -0.21112865543277 | 2.88666753176368  |
| O                                                                                                                                  | 1.66475681992792  | -1.57423704226185 | 0.80131002506573  |
| N                                                                                                                                  | 2.61884734199838  | 2.39744613126773  | 2.45014920898079  |
| H                                                                                                                                  | 1.82101158733527  | 3.07305465091948  | 2.32913451516455  |
| H                                                                                                                                  | 3.28493670843530  | 2.73100953330533  | 3.14199426634181  |
| H                                                                                                                                  | 2.26306626629724  | 1.43895872902570  | 2.70389259540480  |
| H                                                                                                                                  | 3.06698268864472  | 2.30246740738178  | 1.53886851786479  |
| N                                                                                                                                  | -2.61231285319044 | 0.44997823794952  | -2.08226717436857 |
| H                                                                                                                                  | -2.73214815603888 | -0.57005015440406 | -2.02242719938128 |
| H                                                                                                                                  | -3.30858853962246 | 0.90809490864266  | -1.46316349577246 |
| H                                                                                                                                  | -2.70692737265587 | 0.76349744422781  | -3.04451534809350 |
| H                                                                                                                                  | -1.64012909581964 | 0.63087912379126  | -1.72296827580883 |
| Na <sup>+</sup> (Na <sub>2</sub> SO <sub>4</sub> ) <sub>2</sub> (NaHSO <sub>4</sub> ) <sub>4</sub> (NH <sub>3</sub> ) <sub>3</sub> |                   |                   |                   |
| Final Gibbs free energy ... -5827.29300674 Eh                                                                                      |                   |                   |                   |
| Na                                                                                                                                 | 1.23496375803116  | 0.85125787094244  | 0.84959186462359  |
| Na                                                                                                                                 | 0.21879424745399  | 4.12518268158332  | 0.64065603721668  |
| Na                                                                                                                                 | 0.61178840050410  | 1.09232577413732  | -4.17948847954574 |
| Na                                                                                                                                 | 2.93573456364059  | 1.78104315249742  | -1.71283742424462 |
| Na                                                                                                                                 | 3.31630859304939  | 1.18405675192180  | 4.21910647925803  |
| Na                                                                                                                                 | -1.07051848813921 | 0.61800311639394  | -1.06429411276363 |
| Na                                                                                                                                 | -0.45471452795888 | -3.16415174827753 | 3.62850952321931  |
| Na                                                                                                                                 | -0.97199598712900 | 0.42196521177345  | 3.06540702090367  |
| Na                                                                                                                                 | -0.25105579918030 | -3.00984691012097 | -2.13487839456341 |
| S                                                                                                                                  | -2.15726767087490 | 2.43991795035165  | 1.35446817631072  |
| O                                                                                                                                  | -0.67392964161548 | 2.13568234862700  | 1.51730646663638  |
| O                                                                                                                                  | -2.89580455312079 | 1.81251420860156  | 2.49756823880992  |
| O                                                                                                                                  | -2.29951183215280 | 3.94239159610596  | 1.23056234099685  |
| O                                                                                                                                  | -2.68298561784435 | 1.82090107315523  | 0.03851500502920  |
| S                                                                                                                                  | 0.26381547483876  | 3.08216382901279  | -2.19106299272647 |
| O                                                                                                                                  | 1.41865702029990  | 3.08021117212582  | -3.15940468812720 |
| O                                                                                                                                  | -0.14880542866375 | 4.47626187290803  | -1.75208297843712 |
| O                                                                                                                                  | -0.91667105675791 | 2.34962525724200  | -2.81343329573798 |
| O                                                                                                                                  | 0.70443294846944  | 2.32199875201949  | -0.94112914071927 |
| S                                                                                                                                  | 1.45233406107271  | -0.98287280994024 | 4.02448090741894  |
| O                                                                                                                                  | 1.72391232811259  | -2.31289461356605 | 3.31816909131861  |
| O                                                                                                                                  | 0.01667784872078  | -1.05523162811249 | 4.52439310354280  |
| O                                                                                                                                  | 2.44486978247259  | -0.72198539154858 | 5.10716749535144  |
| O                                                                                                                                  | 1.54900362068492  | 0.17805074829222  | 3.01960844720960  |
| S                                                                                                                                  | -1.25891028024211 | -2.00173337191379 | 0.67014722114248  |
| O                                                                                                                                  | -1.89398235767339 | -2.39586572157662 | 1.97915572843422  |
| O                                                                                                                                  | -2.31653975133040 | -1.75923025641910 | -0.40527989023393 |
| O                                                                                                                                  | -0.33301468636298 | -3.10319896856695 | 0.16732651630114  |
| O                                                                                                                                  | -0.48931762307211 | -0.71045518829152 | 0.87055891638142  |
| N                                                                                                                                  | -2.82636081304994 | 4.41698088049381  | -1.40962964296575 |
| H                                                                                                                                  | -1.82624695347087 | 4.59450665177855  | -1.70326748590355 |
| H                                                                                                                                  | -2.81871314442445 | 4.34643532984089  | -0.35761050546119 |
| H                                                                                                                                  | -3.06653152444349 | 3.49113844394444  | -1.76362155074697 |
| H                                                                                                                                  | -3.46838559670216 | 5.12468368371118  | -1.75397864073383 |

|                                                                          |                   |                       |                   |
|--------------------------------------------------------------------------|-------------------|-----------------------|-------------------|
| N                                                                        | 2.38120390317109  | -2.58296814231299     | 0.71456403094255  |
| H                                                                        | 3.10653731382065  | -3.25797255954253     | 0.49194109100976  |
| H                                                                        | 1.44113601190858  | -2.94399443852762     | 0.45868403680809  |
| H                                                                        | 2.50433262613526  | -1.72194090004689     | 0.14028429878068  |
| H                                                                        | 2.33419390443999  | -2.37655096738527     | 1.74465991051599  |
| H                                                                        | 4.86731212156131  | 4.80056683920047      | 1.26579110363884  |
| N                                                                        | -4.25294560240083 | -0.25421815960512     | 0.76445865225708  |
| H                                                                        | -3.80356997341735 | 0.65810300504043      | 0.45997048170649  |
| H                                                                        | -4.19263702563495 | -0.28203042962529     | 1.78118973263486  |
| H                                                                        | -3.64749506981791 | -1.01164652072689     | 0.34259993839064  |
| H                                                                        | -5.22253890516649 | -0.33016791300988     | 0.47107003465922  |
| S                                                                        | 3.46532231075314  | 3.17839872100548      | 1.51974257570704  |
| O                                                                        | 4.67810815442861  | 3.98998356543109      | 0.76502650258773  |
| O                                                                        | 3.30777807470702  | 1.99978593562518      | 0.62156847032712  |
| O                                                                        | 2.29045700022718  | 4.08343081558106      | 1.54356672517550  |
| O                                                                        | 3.96260315847735  | 2.83342318206497      | 2.87533434969502  |
| S                                                                        | 1.72401138715269  | -0.88268311691338     | -2.30302504313030 |
| O                                                                        | 2.14991671788325  | -0.36236781236985     | -0.92795802446949 |
| O                                                                        | 0.20842811584361  | -0.66538814253969     | -2.50702916825621 |
| O                                                                        | 2.43864308657100  | -0.04135669086859     | -3.33275778205368 |
| O                                                                        | 1.98247937621520  | -2.35638001960125     | -2.38933427412131 |
| $\text{Na}^+(\text{Na}_2\text{SO}_4)_2(\text{NaHSO}_4)_4(\text{NH}_3)_4$ |                   |                       |                   |
| Final Gibbs free energy                                                  |                   | ... -5883.84333375 Eh |                   |
| S                                                                        | 2.51012478712366  | 3.68731698795334      | -2.45527281733179 |
| O                                                                        | 2.90294011355673  | 5.00936022971481      | -1.73921340241773 |
| O                                                                        | 3.75421081731603  | 3.00689202108953      | -2.93335823030779 |
| O                                                                        | 1.51472648588608  | 4.06092917245285      | -3.52938314537221 |
| O                                                                        | 1.80622918009198  | 2.76578796478027      | -1.47128592899124 |
| H                                                                        | 6.01368811334997  | 4.34110409250913      | -2.40559621563224 |
| Na                                                                       | 1.34993837113842  | -1.26411133108759     | 3.55636450004173  |
| Na                                                                       | 2.61399660679728  | 2.07421911063022      | 3.42813928372901  |
| Na                                                                       | 0.99029846514517  | 6.15079694419958      | -2.58406028974277 |
| Na                                                                       | 0.98881349808047  | 2.45144253897178      | 0.63507621988263  |
| Na                                                                       | -3.03832328876317 | 4.61493883988374      | -0.73963332477183 |
| Na                                                                       | -0.38617376298318 | 2.93314970484484      | -2.32138405031771 |
| Na                                                                       | -2.97261105253992 | 0.74863905618886      | 2.37404479288572  |
| Na                                                                       | 2.47620169157151  | 5.46554739955186      | 0.53162216881651  |
| Na                                                                       | 3.61824142108211  | 1.29808962565923      | -1.04607155907864 |
| S                                                                        | 4.43256420889035  | 3.44616335803816      | 1.44092277295776  |
| O                                                                        | 2.91681668344630  | 3.32413293296692      | 1.47170788305146  |
| O                                                                        | 4.78060726180300  | 4.89029600248207      | 1.23750502560699  |
| O                                                                        | 5.00591374312559  | 2.62071964368067      | 0.27548958189432  |
| O                                                                        | 4.95651695179804  | 2.85432343094139      | 2.73768192176253  |
| S                                                                        | -0.43666094873944 | 5.68961542487757      | -0.09771750981455 |
| O                                                                        | -0.78431635471932 | 5.01491234029852      | -1.43907348022761 |
| O                                                                        | 0.53009572283924  | 6.81268016386450      | -0.39328129309873 |
| O                                                                        | -1.73010961090227 | 6.11078715145665      | 0.53827429038380  |
| O                                                                        | 0.28568974317472  | 4.70015407638260      | 0.81469994410362  |
| S                                                                        | -2.38427221902812 | 1.82767373627876      | -0.33139672814588 |
| O                                                                        | -2.84964140202925 | 2.44543384887450      | -1.62653083631096 |
| O                                                                        | -2.95427981142282 | 0.46051526011371      | -0.03419050563760 |
| O                                                                        | -0.87441621752976 | 1.72500117366885      | -0.38076776759127 |
| O                                                                        | -2.83712693994352 | 2.75999390332439      | 0.81623779852841  |
| S                                                                        | -0.30527604530407 | 1.10729933490472      | 3.63923271476312  |

|                                                                                       |                   |                   |                   |
|---------------------------------------------------------------------------------------|-------------------|-------------------|-------------------|
| O                                                                                     | 0.66091865030398  | 0.66569394673310  | 4.70543750384954  |
| O                                                                                     | -1.61411789863023 | 1.66519338647422  | 4.15094923100582  |
| O                                                                                     | -0.66224744787831 | -0.14104772081697 | 2.79372659543032  |
| O                                                                                     | 0.37272156512296  | 2.16226971456190  | 2.78862949964790  |
| S                                                                                     | 2.82298497242596  | -0.57496020412018 | 1.18811291586577  |
| O                                                                                     | 3.05150091740771  | 0.03538141801263  | 2.56870935428753  |
| O                                                                                     | 4.16709561567337  | -0.71490187664218 | 0.48996230157861  |
| O                                                                                     | 2.09730436426643  | -1.87673838115081 | 1.38332994744874  |
| O                                                                                     | 1.97870087751351  | 0.35457048419389  | 0.31848840136088  |
| N                                                                                     | 6.02733171107927  | 0.43140331844299  | 2.07957754449200  |
| H                                                                                     | 6.90520059445274  | 0.58178730375072  | 1.58985086193581  |
| H                                                                                     | 5.32106518455010  | -0.03913969235267 | 1.43302787067547  |
| H                                                                                     | 5.63344086139918  | 1.36938824361515  | 2.37960494891925  |
| H                                                                                     | 6.18517771727349  | -0.16083472784734 | 2.89052166342494  |
| N                                                                                     | -0.45448971677175 | -1.03117728428180 | 0.19596825598956  |
| H                                                                                     | 0.35827532672623  | -0.52173250033287 | -0.18668168002498 |
| H                                                                                     | -1.33385116303421 | -0.74838153888924 | -0.25706606298381 |
| H                                                                                     | -0.50005622329045 | -0.70234399095748 | 1.18779522018541  |
| H                                                                                     | -0.27346292691769 | -2.03077604088549 | 0.16274467639925  |
| N                                                                                     | -1.60680723836402 | 4.23309633719072  | 2.80808204863420  |
| H                                                                                     | -0.68797460083631 | 4.47466139265656  | 2.39773389813135  |
| H                                                                                     | -2.11934924645052 | 5.08490050101059  | 3.01863985261613  |
| H                                                                                     | -1.51467299648551 | 3.59304789609662  | 3.60923968116861  |
| H                                                                                     | -2.07882096825615 | 3.70164899430378  | 2.04200835456198  |
| N                                                                                     | 5.63126216094469  | 4.60797935896149  | -1.50216205705814 |
| H                                                                                     | 6.19641014953718  | 5.31323585792168  | -1.03629373525092 |
| H                                                                                     | 5.53436332803775  | 3.77069481843202  | -0.86530725100676 |
| H                                                                                     | 4.64442998153642  | 4.94140321543592  | -1.63866760431377 |
| Na <sup>+</sup> (Na <sub>2</sub> SO <sub>4</sub> ) <sub>3</sub> (NaHSO <sub>4</sub> ) |                   |                   |                   |
| Final Gibbs free energy                                                               |                   | ...               | -4095.44188777 Eh |
| Na                                                                                    | 4.29922568010299  | 2.01811523222885  | -0.58791686957773 |
| Na                                                                                    | -2.54816743039729 | 4.46217893133927  | -2.54834079172451 |
| Na                                                                                    | 1.69259963657441  | 6.82246806329230  | -1.99052535505550 |
| Na                                                                                    | 0.20918925645150  | 0.77303618654341  | -4.31241737093968 |
| Na                                                                                    | 4.19476839461437  | 3.21299870973715  | -3.65868082400374 |
| Na                                                                                    | 1.74362352996088  | 5.28254568912615  | 1.03606996701568  |
| Na                                                                                    | 1.12058870377559  | 3.40490716068498  | -2.02287265785013 |
| Na                                                                                    | 0.44060677202361  | -0.32309171239703 | -1.13387495264939 |
| S                                                                                     | -1.63706029363084 | 1.66723078837547  | -2.14124958652883 |
| O                                                                                     | -0.86277307780027 | 2.57971436548312  | -3.06658762579584 |
| O                                                                                     | -1.38609201713485 | 0.23840915825642  | -2.51050005937331 |
| O                                                                                     | -0.91069843370449 | 1.74971798766549  | -0.68616791288310 |
| O                                                                                     | -3.02996609303974 | 2.11945653262318  | -2.00476427719082 |
| S                                                                                     | -0.60095991522027 | 5.46818354173346  | -0.73778714000093 |
| O                                                                                     | -0.13316748753464 | 4.14177271041869  | -0.08060631143194 |
| O                                                                                     | 0.24565316727861  | 6.56021479387234  | -0.11721229144427 |
| O                                                                                     | -2.07035022836896 | 5.62954350069105  | -0.59768087351936 |
| O                                                                                     | -0.23984469083279 | 5.38935760308206  | -2.22744463640156 |
| S                                                                                     | 3.66534673446762  | 4.79200455198319  | -1.25220266220891 |
| O                                                                                     | 2.92078121896193  | 3.85986602801737  | -0.28607160329665 |
| O                                                                                     | 3.68015142238957  | 6.16861351930819  | -0.65963725610116 |
| O                                                                                     | 4.99439990468317  | 4.13941987553861  | -1.55752760382438 |
| O                                                                                     | 2.87516747498827  | 4.85006049166100  | -2.57310080639753 |
| S                                                                                     | 2.60592265053697  | 0.89721449602822  | -2.71818730613570 |

|                                                                                                                      |                   |                       |                   |
|----------------------------------------------------------------------------------------------------------------------|-------------------|-----------------------|-------------------|
| O                                                                                                                    | 2.12544989175942  | 1.99486957024413      | -3.67819070625738 |
| O                                                                                                                    | 2.12681039128430  | 1.23537114356212      | -1.30163861206729 |
| O                                                                                                                    | 4.11339439493354  | 0.92119090906137      | -2.71420992926666 |
| O                                                                                                                    | 1.94041224314373  | -0.39574914812022     | -3.12174650795157 |
| H                                                                                                                    | -0.75597220540240 | 2.72472365142642      | -0.39030533331367 |
| Na <sup>+</sup> (Na <sub>2</sub> SO <sub>4</sub> ) <sub>3</sub> (NaHSO <sub>4</sub> )(NH <sub>3</sub> )              |                   |                       |                   |
| Final Gibbs free energy                                                                                              |                   | ... -4151.98772662 Eh |                   |
| Na                                                                                                                   | 4.31535033846359  | 2.01514748247744      | -0.60593314820496 |
| Na                                                                                                                   | -2.21420172615769 | 4.45448280301867      | -2.74323850830157 |
| Na                                                                                                                   | 1.71363540512332  | 6.82292907474218      | -2.13633109138983 |
| Na                                                                                                                   | 0.21744345794638  | 0.87655663497891      | -4.36583455892673 |
| Na                                                                                                                   | 4.12595220336146  | 3.20058143679963      | -3.67233575796059 |
| Na                                                                                                                   | 1.89687398384307  | 5.64722984061008      | 0.93241065639092  |
| Na                                                                                                                   | 1.00818299209093  | 3.23537160342082      | -1.66279739251244 |
| Na                                                                                                                   | 0.38579497348244  | -0.36407730548857     | -1.31509799082097 |
| S                                                                                                                    | -1.54518387077888 | 1.64955442992803      | -2.17315411043561 |
| O                                                                                                                    | -0.87793136064231 | 2.60295222072014      | -3.17073533293420 |
| O                                                                                                                    | -1.47925403047786 | 0.25665414319441      | -2.75951909873384 |
| O                                                                                                                    | -0.75217620690349 | 1.64609653901985      | -0.87402040576979 |
| O                                                                                                                    | -2.94038326080989 | 2.18494988190725      | -1.91123804305447 |
| S                                                                                                                    | -0.53379713501192 | 5.66390867440262      | -0.67862478449055 |
| O                                                                                                                    | -0.03839059500474 | 4.51292062844191      | 0.18750336541848  |
| O                                                                                                                    | 0.20857267836707  | 6.91269023340342      | -0.25499208508131 |
| O                                                                                                                    | -2.04525906622880 | 5.74473448253174      | -0.59849409817889 |
| O                                                                                                                    | -0.17057856382004 | 5.38559946693327      | -2.14093420729178 |
| S                                                                                                                    | 3.62160925831494  | 4.78074423847765      | -1.26404653074868 |
| O                                                                                                                    | 2.93179054499477  | 3.88362300738346      | -0.22958569816686 |
| O                                                                                                                    | 3.63035384494617  | 6.18735709049783      | -0.71648535689858 |
| O                                                                                                                    | 4.95961068917049  | 4.15654428130755      | -1.58547385976013 |
| O                                                                                                                    | 2.79287988204906  | 4.78917550718166      | -2.55205216429138 |
| S                                                                                                                    | 2.63582640813625  | 0.87565498004749      | -2.71113459323731 |
| O                                                                                                                    | 2.09591187468591  | 2.03068623932148      | -3.56158768259337 |
| O                                                                                                                    | 2.23449636916161  | 1.09945529025218      | -1.24970749795053 |
| O                                                                                                                    | 4.14406139666952  | 0.92422980240865      | -2.78546738220705 |
| O                                                                                                                    | 1.96387302908231  | -0.39146103775190     | -3.18273245507153 |
| N                                                                                                                    | -2.65826950132474 | 3.31226112028946      | 0.60432116408171  |
| H                                                                                                                    | -1.67179536235788 | 3.04648364079435      | 0.70941378549053  |
| H                                                                                                                    | -2.99919625078242 | 2.77751863768732      | -0.22980976156885 |
| H                                                                                                                    | -2.64064199330241 | 4.32916547214166      | 0.36527067932094  |
| H                                                                                                                    | -3.19887646627794 | 3.11624359890683      | 1.44175030688303  |
| Na <sup>+</sup> (Na <sub>2</sub> SO <sub>4</sub> ) <sub>3</sub> (NaHSO <sub>4</sub> )(NH <sub>3</sub> ) <sub>2</sub> |                   |                       |                   |
| Final Gibbs free energy                                                                                              |                   | ... -4208.52301397 Eh |                   |
| Na                                                                                                                   | -0.12511793864697 | 4.16051477247163      | 1.72440379215764  |
| Na                                                                                                                   | 0.14609670846340  | 4.70992903214456      | -1.89918169444253 |
| Na                                                                                                                   | -2.72839756295308 | 6.85836725676611      | -0.97480414269174 |
| Na                                                                                                                   | 3.11612785440985  | 2.71243517446179      | -2.70333851130270 |
| Na                                                                                                                   | 0.92184839307580  | 7.78195261614128      | -3.64152391250929 |
| Na                                                                                                                   | -3.34682191477170 | 4.14397541554876      | -2.89206822860534 |
| Na                                                                                                                   | 3.59047380214066  | 5.31499968724840      | -0.74870937025470 |
| Na                                                                                                                   | -0.60491430044728 | 1.54266731387779      | -0.21241314738945 |
| S                                                                                                                    | 1.90803457076552  | 3.03935113128798      | -0.05631451264056 |
| O                                                                                                                    | 1.20447316266009  | 2.58751411442669      | -1.34299778049466 |
| O                                                                                                                    | 3.39467817039282  | 2.91012761620905      | -0.28321802910967 |
| O                                                                                                                    | 1.59898490735004  | 4.51956916432238      | 0.18819494633989  |

|                                                                                                    |                   |                   |                   |
|----------------------------------------------------------------------------------------------------|-------------------|-------------------|-------------------|
| O                                                                                                  | 1.31518490370755  | 2.25187423998245  | 1.08731245768615  |
| S                                                                                                  | -1.63976030778374 | 6.36746990646290  | -3.66606002552853 |
| O                                                                                                  | -1.12134747542767 | 7.10803251397055  | -4.88968150194873 |
| O                                                                                                  | -0.88151546728725 | 6.91834289682179  | -2.45518829851504 |
| O                                                                                                  | -3.11899534061804 | 6.50984726717964  | -3.39476313924877 |
| O                                                                                                  | -1.33103435704094 | 4.88649187262981  | -3.82579221298055 |
| S                                                                                                  | 2.67888549800135  | 5.48031862025310  | -3.52814127448056 |
| O                                                                                                  | 2.05841759953706  | 6.19796465527917  | -2.32484657848715 |
| O                                                                                                  | 2.71163242702947  | 6.44018555590843  | -4.67892205191246 |
| O                                                                                                  | 4.00724736889260  | 4.91021539699931  | -3.07881315807584 |
| O                                                                                                  | 1.78221470889430  | 4.27972321062761  | -3.89151465723929 |
| S                                                                                                  | -2.30315277682090 | 3.91001368591207  | -0.19727513280593 |
| O                                                                                                  | -1.81604591974984 | 3.13005000742504  | -1.42268297308318 |
| O                                                                                                  | -2.11201645033676 | 3.02295167230492  | 1.01547126549482  |
| O                                                                                                  | -3.70784040774596 | 4.37561286838963  | -0.47508224543122 |
| O                                                                                                  | -1.41009305721443 | 5.14055578181937  | -0.00724196597668 |
| N                                                                                                  | 0.44569314202465  | 5.16870095028036  | -6.11583805012890 |
| H                                                                                                  | -0.21508008073678 | 5.91708493126891  | -5.78005903962604 |
| H                                                                                                  | 0.87002557154323  | 4.71660834828553  | -5.25744855876443 |
| H                                                                                                  | 1.20658362733552  | 5.58219836969362  | -6.65220066378974 |
| H                                                                                                  | -0.06148771502052 | 4.48698468802146  | -6.67320139822976 |
| N                                                                                                  | -4.60151798851530 | 7.27840866661434  | 0.47073983723076  |
| H                                                                                                  | -4.52675712449826 | 7.72057655680554  | 1.38091228875184  |
| H                                                                                                  | -4.78377106817199 | 6.29150603181410  | 0.64422506033265  |
| H                                                                                                  | -5.44625838967846 | 7.65293387161116  | 0.05020692569893  |
| Na <sup>+</sup> (Na <sub>2</sub> SO <sub>4</sub> ) <sub>3</sub> (NaHSO <sub>4</sub> ) <sub>2</sub> |                   |                   |                   |
| Final Gibbs free energy ... -4957.44922884 Eh                                                      |                   |                   |                   |
| S                                                                                                  | 2.71670488606369  | -2.45549462506016 | -1.78654994019860 |
| O                                                                                                  | 3.10338664546092  | -4.00825298978637 | -1.41829236438984 |
| O                                                                                                  | 3.77347552076733  | -1.70820715924809 | -1.04780532845400 |
| O                                                                                                  | 2.79539836541876  | -2.33302514249231 | -3.26296953669094 |
| O                                                                                                  | 1.35744852999474  | -2.18835489243897 | -1.24850832531013 |
| H                                                                                                  | 2.62023010091488  | -4.61163026537534 | -2.00702702315135 |
| Na                                                                                                 | -0.20338689624483 | -0.60243198134942 | 3.71122001954639  |
| Na                                                                                                 | -0.14355165230088 | -1.88450139258088 | 0.48060321377940  |
| Na                                                                                                 | 4.51368387700747  | -2.29536255559643 | 1.11872036222106  |
| Na                                                                                                 | 2.32366582578019  | 0.17929942044742  | -0.31482280379789 |
| Na                                                                                                 | 2.64806840571892  | -0.37182989086289 | -4.32019411269643 |
| Na                                                                                                 | -0.06869280084947 | 2.30059871509961  | -1.24753752945595 |
| Na                                                                                                 | 2.44848874220829  | 1.51513930879241  | 2.68632269560053  |
| Na                                                                                                 | 2.15873069274181  | 5.22757389823899  | -1.80313666981884 |
| Na                                                                                                 | -0.32861638140333 | 3.65616101531662  | 1.98934909975851  |
| S                                                                                                  | 2.40757332711620  | -1.41538169748746 | 2.81032105137500  |
| O                                                                                                  | 2.12360781334241  | -0.49653319896518 | 3.98115581701755  |
| O                                                                                                  | 1.07253919329210  | -1.98265710117042 | 2.34398916639116  |
| O                                                                                                  | 3.01383619453934  | -0.54002417891737 | 1.68573453075707  |
| O                                                                                                  | 3.38901231558182  | -2.50438321518018 | 3.09054912503814  |
| S                                                                                                  | 2.25503712150950  | 3.80737632605296  | 0.67440368098319  |
| O                                                                                                  | 2.04036063711802  | 3.78093709140327  | 2.16352580694821  |
| O                                                                                                  | 3.17988307109813  | 4.86860244029908  | 0.18645686530432  |
| O                                                                                                  | 2.79572572337801  | 2.42149467785612  | 0.25373393792200  |
| O                                                                                                  | 0.88628654958693  | 4.01297429815428  | -0.00693862410630 |
| H                                                                                                  | 3.42779366887512  | 2.57648945819756  | -1.20358348401319 |
| S                                                                                                  | 2.39886160763179  | 2.22086172231828  | -3.07760395252972 |

|                                                                                                                                    |                   |                       |                   |
|------------------------------------------------------------------------------------------------------------------------------------|-------------------|-----------------------|-------------------|
| 0                                                                                                                                  | 1.78431588837356  | 0.98352519305684      | -2.45310855191345 |
| 0                                                                                                                                  | 2.91920466052805  | 1.92856781522812      | -4.42723798225119 |
| 0                                                                                                                                  | 1.44103436124446  | 3.36850722381368      | -2.97908766867030 |
| 0                                                                                                                                  | 3.68641039441101  | 2.61386180241594      | -2.19517361428468 |
| S                                                                                                                                  | -0.76916125396947 | 0.88281041049695      | 1.25390605014010  |
| 0                                                                                                                                  | 0.11389234709529  | 0.41231095854933      | 0.09483788185699  |
| 0                                                                                                                                  | 0.09803981607588  | 1.37608640487940      | 2.42038434298678  |
| 0                                                                                                                                  | -1.57617135424215 | 2.05501820516468      | 0.75589194801687  |
| 0                                                                                                                                  | -1.56560641369320 | -0.30087652849721     | 1.73407262119253  |
| Na <sup>+</sup> (Na <sub>2</sub> SO <sub>4</sub> ) <sub>3</sub> (NaHSO <sub>4</sub> ) <sub>2</sub> (NH <sub>3</sub> )              |                   |                       |                   |
| Final Gibbs free energy                                                                                                            |                   | ... -5013.98915965 Eh |                   |
| S                                                                                                                                  | 2.48822975719621  | -2.73398713976128     | -1.89727194297418 |
| 0                                                                                                                                  | 2.71544312423088  | -3.19479274937272     | -3.46553666560003 |
| 0                                                                                                                                  | 2.82687646895306  | -1.28671590891369     | -2.01202487828517 |
| 0                                                                                                                                  | 1.06128401627117  | -2.99719551257073     | -1.58156243111701 |
| 0                                                                                                                                  | 3.42557914349045  | -3.52599115362579     | -1.06808265401103 |
| H                                                                                                                                  | 2.50991736899266  | -4.13989357445551     | -3.55646070512629 |
| Na                                                                                                                                 | -0.09905322923365 | -0.97860884301944     | 3.30829832429730  |
| Na                                                                                                                                 | -0.02708754484190 | -1.97794110701525     | 0.09770111659489  |
| Na                                                                                                                                 | 3.21648172459850  | -3.85501836523026     | 1.15260026553370  |
| Na                                                                                                                                 | 2.56755675185029  | 0.46761539490070      | -0.38170427177351 |
| Na                                                                                                                                 | 2.68824929100053  | -0.00669751769354     | -3.97485869550249 |
| Na                                                                                                                                 | -0.00347188952510 | 2.24165170892491      | -1.45101036360492 |
| Na                                                                                                                                 | 2.39100519020442  | 1.48060090247985      | 2.73363515749907  |
| Na                                                                                                                                 | 1.84184862875470  | 5.15954010363238      | -1.73867939882369 |
| Na                                                                                                                                 | -0.48794230286756 | 3.44113983215499      | 1.87396427435847  |
| S                                                                                                                                  | 2.65707138140484  | -1.44873419748170     | 2.50595095078346  |
| 0                                                                                                                                  | 1.47335490704297  | -2.18956573114902     | 1.81745714185554  |
| 0                                                                                                                                  | 2.10580146754809  | -0.72605915266763     | 3.72056571659056  |
| 0                                                                                                                                  | 3.69032770938230  | -2.47310324126521     | 2.83917102519626  |
| 0                                                                                                                                  | 3.20565151867441  | -0.40251305664540     | 1.55695727317935  |
| S                                                                                                                                  | 2.19878395917111  | 3.82475868520393      | 0.84428293792679  |
| 0                                                                                                                                  | 1.78709329677157  | 3.90023551139654      | 2.29271697278073  |
| 0                                                                                                                                  | 3.01798338629075  | 4.97778994941667      | 0.34604057419365  |
| 0                                                                                                                                  | 2.99772700360359  | 2.52194911971851      | 0.67341518930100  |
| 0                                                                                                                                  | 0.91628067007103  | 3.77153387009304      | -0.00210224892152 |
| N                                                                                                                                  | 5.05914637008429  | 3.38868153304300      | -0.92754907997948 |
| H                                                                                                                                  | 5.92160083550719  | 2.87834616532845      | -1.09457060172133 |
| H                                                                                                                                  | 5.25694912651468  | 4.32163932682559      | -0.56938793724735 |
| H                                                                                                                                  | 4.44250440675700  | 2.92455331594449      | -0.21741674155695 |
| H                                                                                                                                  | 4.45243293444647  | 3.47767279743018      | -1.81221441209508 |
| S                                                                                                                                  | 2.26781910593916  | 2.77113635229977      | -3.30952217107281 |
| 0                                                                                                                                  | 2.25690652036836  | 1.59662742646952      | -2.31514972749561 |
| 0                                                                                                                                  | 2.52246025036878  | 2.19745429627867      | -4.66262513474201 |
| 0                                                                                                                                  | 0.94289208761794  | 3.49539966419131      | -3.18041417476976 |
| 0                                                                                                                                  | 3.35251645578150  | 3.77329265678982      | -2.89703858689498 |
| S                                                                                                                                  | -0.66882378010753 | 0.69056467500604      | 0.99449090622397  |
| 0                                                                                                                                  | 0.29244223801944  | 0.32345419355781      | -0.13837076691275 |
| 0                                                                                                                                  | 0.10442745901592  | 1.17505411881725      | 2.22504777272895  |
| 0                                                                                                                                  | -1.54305630150701 | 1.81734127943602      | 0.51502788939952  |
| 0                                                                                                                                  | -1.40904618983804 | -0.56865036947093     | 1.38815462178972  |
| Na <sup>+</sup> (Na <sub>2</sub> SO <sub>4</sub> ) <sub>3</sub> (NaHSO <sub>4</sub> ) <sub>2</sub> (NH <sub>3</sub> ) <sub>2</sub> |                   |                       |                   |
| Final Gibbs free energy                                                                                                            |                   | ... -5070.52815354 Eh |                   |
| S                                                                                                                                  | 3.40510999250281  | -1.94923358543983     | -1.88277807823479 |

|                                                                                                    |                   |                   |                   |
|----------------------------------------------------------------------------------------------------|-------------------|-------------------|-------------------|
| O                                                                                                  | 3.25717099507908  | -2.04535981990543 | -3.36095326974903 |
| O                                                                                                  | 4.11699028393993  | -0.66016527801688 | -1.49412701308463 |
| O                                                                                                  | 2.02923986770307  | -1.96831793138548 | -1.19923732147321 |
| O                                                                                                  | 4.18938173124044  | -3.11875869342840 | -1.27923868073804 |
| H                                                                                                  | 4.73602925985776  | -1.24348819098153 | 1.02608344467518  |
| Na                                                                                                 | -0.20502126005886 | -1.14304428704053 | 3.29579642959475  |
| Na                                                                                                 | -0.01642547585366 | -1.74556273342451 | -0.18578845409260 |
| Na                                                                                                 | 2.65168684988196  | -3.77461970259115 | 0.32076811511373  |
| Na                                                                                                 | 2.34997494006578  | 0.37650107737428  | -0.41519163409419 |
| Na                                                                                                 | 2.48701709228505  | -0.09243809944162 | -4.24575546423571 |
| Na                                                                                                 | -0.16103988839635 | 2.37466945536334  | -1.31478789857346 |
| Na                                                                                                 | 2.43490956098590  | 1.24525154646130  | 2.75169207131535  |
| Na                                                                                                 | 2.11828534037004  | 4.95924212439730  | -1.64635033202113 |
| Na                                                                                                 | -0.22197983964213 | 3.44239757889366  | 2.09425103130527  |
| S                                                                                                  | 2.47538347172167  | -1.79001108951027 | 2.36333719617253  |
| O                                                                                                  | 1.18840180940696  | -2.27761518129883 | 1.67563157180824  |
| O                                                                                                  | 2.09412885154442  | -1.21144914788222 | 3.69937621343559  |
| O                                                                                                  | 3.43285501702762  | -2.94774652689366 | 2.39788599075996  |
| O                                                                                                  | 3.11816417083932  | -0.66101467241229 | 1.54220153781880  |
| S                                                                                                  | 2.42580483231885  | 3.58555009078894  | 0.90783381531336  |
| O                                                                                                  | 2.08478268737050  | 3.65063879283994  | 2.38174267607586  |
| O                                                                                                  | 3.30229187692854  | 4.67679922315911  | 0.39366172631270  |
| O                                                                                                  | 3.10339391486178  | 2.22493201480020  | 0.68319781123471  |
| O                                                                                                  | 1.09597332155820  | 3.64335563640514  | 0.13182404464583  |
| N                                                                                                  | 4.90804090316098  | 2.12549899157442  | -1.44496388697691 |
| H                                                                                                  | 4.89556291550761  | 1.12039325531294  | -1.66107106426000 |
| H                                                                                                  | 5.85307801677944  | 2.49697313591668  | -1.45877481406906 |
| H                                                                                                  | 4.45571100117256  | 2.26824699791550  | -0.51755520267441 |
| H                                                                                                  | 4.26796276729313  | 2.64500791812333  | -2.15209015242574 |
| S                                                                                                  | 1.96261877896291  | 2.61018727134260  | -3.36110963176302 |
| O                                                                                                  | 1.84624507274509  | 1.37775987490865  | -2.44582835931594 |
| O                                                                                                  | 2.05539584492407  | 2.12012070238321  | -4.76481339191932 |
| O                                                                                                  | 0.78876946882672  | 3.52391900100273  | -3.07996605080345 |
| O                                                                                                  | 3.22167109818006  | 3.40361039667794  | -2.96473071348307 |
| S                                                                                                  | -0.74696039917229 | 0.75131049431535  | 1.16220086181917  |
| O                                                                                                  | 0.13488279465170  | 0.48169970434141  | -0.05841612804960 |
| O                                                                                                  | 0.12937378758172  | 1.06325067726775  | 2.38536783165399  |
| O                                                                                                  | -1.58657271111636 | 1.95992977531128  | 0.86076714822325  |
| O                                                                                                  | -1.51003512774619 | -0.51849389476823 | 1.44962687977063  |
| N                                                                                                  | 5.52142223274049  | -1.88099926943896 | 0.75320326580853  |
| H                                                                                                  | 6.35869040958223  | -1.36285984007273 | 0.50355105874885  |
| H                                                                                                  | 5.15884877553893  | -2.42401328916393 | -0.08416989111637 |
| H                                                                                                  | 5.69045177120071  | -2.50241167096866 | 1.54311123051742  |
| Na <sup>+</sup> (Na <sub>2</sub> SO <sub>4</sub> ) <sub>3</sub> (NaHSO <sub>4</sub> ) <sub>3</sub> |                   |                   |                   |
| Final Gibbs free energy                                                                            |                   | ...               | -5819.45784419 Eh |
| S                                                                                                  | 1.33987709118579  | 2.29646133420728  | 0.81806425467938  |
| O                                                                                                  | 2.62721146798059  | 3.30812696910577  | 0.86359342213314  |
| O                                                                                                  | 0.32272639011136  | 2.87029473582483  | 1.76048836240660  |
| O                                                                                                  | 0.88826383208547  | 2.24242451013901  | -0.58540228577865 |
| O                                                                                                  | 1.92608897855786  | 1.04950304327777  | 1.38385083177147  |
| H                                                                                                  | 2.41956934321832  | 4.10636169239996  | 0.34962836874678  |
| S                                                                                                  | -0.84827011874349 | -0.23849055697197 | 3.55359984560924  |
| O                                                                                                  | 0.58666593166803  | -0.61666391250193 | 3.82278024608730  |
| O                                                                                                  | -1.09862063785336 | 1.19388842001425  | 4.05628897355439  |

|                                                                        |                   |                       |                   |
|------------------------------------------------------------------------|-------------------|-----------------------|-------------------|
| O                                                                      | -1.05357062669061 | -0.22238855546771     | 2.04634958663178  |
| O                                                                      | -1.83610539596945 | -1.15593307586576     | 4.22082999514844  |
| H                                                                      | 0.16353249827421  | -2.92813802852917     | 3.30950258004322  |
| Na                                                                     | -1.86680782180674 | 1.93684080136447      | 1.80628585158197  |
| Na                                                                     | -3.44665696340954 | -2.46081260773213     | 3.16504710931961  |
| Na                                                                     | -0.43876241044947 | 1.02153195451709      | -1.92474415593556 |
| Na                                                                     | -2.19028483975510 | -1.15555776954375     | 0.34999660748408  |
| Na                                                                     | 1.23753625320744  | 1.63864221782460      | 3.66675911342327  |
| Na                                                                     | -1.01482845452593 | -4.57855158124075     | -1.04569137703579 |
| Na                                                                     | -3.02733155936300 | -0.97807588140042     | -3.20609546719636 |
| Na                                                                     | -5.75402619495663 | 2.50448253961895      | 0.97949369271010  |
| Na                                                                     | -3.29393744123621 | 0.65190144435094      | 4.77261332489061  |
| Na                                                                     | 0.97586072826640  | -1.13122541768278     | 1.25739810161978  |
| S                                                                      | -4.90397682433837 | 0.13745290504436      | 2.36676890953892  |
| O                                                                      | -6.26801708916314 | 0.54356293107898      | 1.92333729821004  |
| O                                                                      | -4.04715861678422 | 1.41426047875690      | 2.50777366537663  |
| O                                                                      | -4.86654490920856 | -0.60289494423416     | 3.68049166707760  |
| O                                                                      | -4.26965104537682 | -0.79215883765602     | 1.31679814134212  |
| S                                                                      | -0.56295539387988 | -1.89972996620828     | -1.98170164469649 |
| O                                                                      | -0.10187182741764 | -1.07057749916064     | -0.77667258397146 |
| O                                                                      | -1.99042072304961 | -2.40788068968927     | -1.66730295979693 |
| O                                                                      | -0.68456575784493 | -0.94802021014157     | -3.15649247452524 |
| O                                                                      | 0.32016879916467  | -3.07545524063106     | -2.20534291030782 |
| S                                                                      | -3.50296573865106 | 1.33301774187168      | -1.26813813000998 |
| O                                                                      | -4.28408051444978 | -0.10003379686507     | -1.16901835531686 |
| O                                                                      | -4.44372866476816 | 2.39428455750470      | -0.84787475294596 |
| O                                                                      | -2.31225096430259 | 1.21508213330705      | -0.35305217291131 |
| O                                                                      | -3.07519498088986 | 1.34717512740484      | -2.68888947136669 |
| S                                                                      | -1.18861647953417 | -4.11024224546494     | 2.06278279516554  |
| O                                                                      | 0.19189319728486  | -3.20641865768253     | 2.37525045911842  |
| O                                                                      | -2.12066898036155 | -3.16647357554585     | 1.35525531201101  |
| O                                                                      | -0.69033018932130 | -5.15341677318078     | 1.14305478914319  |
| O                                                                      | -1.71547137882720 | -4.50320655544691     | 3.37879774650119  |
| H                                                                      | -4.44630562866447 | -0.34957361863996     | -0.18522675618879 |
| $\text{Na}^+(\text{Na}_2\text{SO}_4)_3(\text{NaHSO}_4)_3(\text{NH}_3)$ |                   |                       |                   |
| Final Gibbs free energy                                                |                   | ... -5876.00143876 Eh |                   |
| S                                                                      | 0.90388836097779  | 2.57530389367408      | -3.39054460426315 |
| O                                                                      | -0.49575154527438 | 3.23935092482349      | -3.44457498856742 |
| O                                                                      | 1.13401409349619  | 1.81871208997147      | -4.66027303290765 |
| O                                                                      | 0.95563118725342  | 1.59218377496233      | -2.22469849537693 |
| O                                                                      | 1.89496541809977  | 3.67836883203844      | -3.10712365711413 |
| H                                                                      | -1.21208591882360 | 2.70491624985195      | -4.89910035121987 |
| Na                                                                     | -2.25154962723378 | 2.83139756592755      | -1.86453040540569 |
| Na                                                                     | 1.71758968005596  | -1.02844928087347     | 3.14858225912434  |
| Na                                                                     | 2.26554849504108  | 2.94032547607990      | -0.78559978082188 |
| Na                                                                     | 0.74913701718039  | -0.33686050505848     | -3.57440550967864 |
| Na                                                                     | 0.28079374097322  | 5.25861301526007      | -2.46291379764227 |
| Na                                                                     | 1.20376604682652  | 4.89158091540282      | 2.19113855851019  |
| Na                                                                     | -0.17341600341471 | 0.64881643010150      | -0.46971034823082 |
| Na                                                                     | -0.65598106284139 | -4.73725812066911     | -0.14899989389674 |
| Na                                                                     | -2.64169967223044 | -1.55817223984852     | -0.74272676185618 |
| S                                                                      | -0.69147791429548 | -1.96061664397629     | 1.71062367801029  |
| O                                                                      | 0.85855482605110  | -2.06586588620445     | 1.14078817621489  |
| O                                                                      | -1.38590682402592 | -3.22431938861553     | 1.33077768904701  |

|                                                                                                                                    |                   |                   |                   |
|------------------------------------------------------------------------------------------------------------------------------------|-------------------|-------------------|-------------------|
| O                                                                                                                                  | -1.30711523571808 | -0.78773791283340 | 1.01792781316638  |
| O                                                                                                                                  | -0.44489148693426 | -1.78365674586215 | 3.15392837665211  |
| S                                                                                                                                  | 0.13207637492044  | -2.86902116569702 | -2.13799285124991 |
| O                                                                                                                                  | 0.28197986493619  | -2.64668830715817 | -3.62187509708092 |
| O                                                                                                                                  | 0.92049941728948  | -4.01244234314391 | -1.59510700386472 |
| O                                                                                                                                  | 0.53600553730637  | -1.56315154750592 | -1.43076161640777 |
| O                                                                                                                                  | -1.36263395348021 | -3.14349474485208 | -1.85061449649293 |
| H                                                                                                                                  | -0.14460633235208 | 2.49012628565415  | 1.70209340949345  |
| Na                                                                                                                                 | -2.02716769890270 | -2.48277371687643 | -4.04185570553762 |
| S                                                                                                                                  | 1.94070581622333  | 1.89993798149936  | 2.01485860295328  |
| O                                                                                                                                  | 0.46005005030037  | 2.38593248608018  | 2.50698386046433  |
| O                                                                                                                                  | 1.74620323001468  | 1.12599884229475  | 0.74676999618777  |
| O                                                                                                                                  | 2.70350293510826  | 3.16060109072647  | 1.75713804004034  |
| O                                                                                                                                  | 2.45009278290599  | 1.08665752411756  | 3.13760610867414  |
| H                                                                                                                                  | 0.85995829968418  | -1.89633966911090 | 0.14039764829732  |
| S                                                                                                                                  | -0.67977935642621 | 4.38581674671212  | 0.12512573063460  |
| O                                                                                                                                  | 0.79971125957436  | 4.64402497919653  | -0.23661078810205 |
| O                                                                                                                                  | -0.95028577135389 | 5.03571230781937  | 1.43718415480112  |
| O                                                                                                                                  | -1.53212169034078 | 4.88631553164702  | -1.01547406770366 |
| O                                                                                                                                  | -0.88725519443626 | 2.86220735794789  | 0.23263858657978  |
| S                                                                                                                                  | -2.66772433125214 | 0.19803720850115  | -3.11259900879802 |
| O                                                                                                                                  | -1.55829917235878 | -0.16148787063608 | -4.13304494749299 |
| O                                                                                                                                  | -3.37691457597228 | 1.43110265582271  | -3.57065003012340 |
| O                                                                                                                                  | -2.03654358494728 | 0.48027819638864  | -1.75210150692543 |
| O                                                                                                                                  | -3.52976483275249 | -1.03449178757641 | -2.96763769568234 |
| N                                                                                                                                  | -1.54009421329830 | 2.09804805286224  | -5.69601503569550 |
| H                                                                                                                                  | -1.53600571129833 | 1.13378911374631  | -5.27755070340124 |
| H                                                                                                                                  | -0.87892329798902 | 2.16794896904333  | -6.46526673006782 |
| H                                                                                                                                  | -2.48750542626628 | 2.33749737834488  | -5.97694077724358 |
| Na <sup>+</sup> (Na <sub>2</sub> SO <sub>4</sub> ) <sub>3</sub> (NaHSO <sub>4</sub> ) <sub>3</sub> (NH <sub>3</sub> ) <sub>2</sub> |                   |                   |                   |
| Final Gibbs free energy                                                                                                            |                   | ...               | -5932.54083633 Eh |
| S                                                                                                                                  | 0.91425892480324  | 2.52584763564168  | -3.32713715450781 |
| O                                                                                                                                  | -0.49523136217358 | 3.16952490130852  | -3.39766056819478 |
| O                                                                                                                                  | 1.17297069728321  | 1.79765333886814  | -4.61095565849396 |
| O                                                                                                                                  | 0.96286068165564  | 1.50683944126649  | -2.19010798276394 |
| O                                                                                                                                  | 1.88381754192441  | 3.63212986344042  | -3.00409340029243 |
| H                                                                                                                                  | -1.13664782754064 | 2.68100718617832  | -4.91072495384799 |
| Na                                                                                                                                 | -2.39122437148263 | 2.84193013609721  | -1.99935881489589 |
| Na                                                                                                                                 | 1.95312143216715  | -0.94222071057649 | 2.63977392469944  |
| Na                                                                                                                                 | 2.29467686499898  | 2.76900446787615  | -0.69585204275221 |
| Na                                                                                                                                 | 0.72179523634608  | -0.36475104576481 | -3.58902100933644 |
| Na                                                                                                                                 | 0.22113010122964  | 5.15003033126859  | -2.28271506765130 |
| Na                                                                                                                                 | 1.06218399409654  | 4.83918677829930  | 2.32215459811879  |
| Na                                                                                                                                 | -0.27788795476147 | 0.86054004893282  | -0.40580678805925 |
| Na                                                                                                                                 | -0.20259160812053 | -4.43817225884811 | 0.46404180195696  |
| Na                                                                                                                                 | -2.80032152236414 | -1.51032616987059 | -0.84612746036382 |
| S                                                                                                                                  | -0.75422390965134 | -1.81442983318780 | 1.63099765845159  |
| O                                                                                                                                  | 0.61372389013525  | -2.19298879561848 | 0.94837248416943  |
| O                                                                                                                                  | -1.58214261186704 | -3.06465760028884 | 1.64203234482986  |
| O                                                                                                                                  | -1.42905076675724 | -0.74987401895092 | 0.79027680179777  |
| O                                                                                                                                  | -0.41742002844268 | -1.26730859785606 | 2.98468494040608  |
| S                                                                                                                                  | 0.05877371434379  | -3.03649418874097 | -2.19849990095457 |
| O                                                                                                                                  | 0.24886158078528  | -2.77579445325669 | -3.65569825084680 |
| O                                                                                                                                  | 0.76794912155760  | -4.19799884537888 | -1.62089201837079 |

|                                                                                                                                    |                   |                   |                   |
|------------------------------------------------------------------------------------------------------------------------------------|-------------------|-------------------|-------------------|
| O                                                                                                                                  | 0.67884904641761  | -1.69889045615855 | -1.52410611966331 |
| O                                                                                                                                  | -1.41272695811905 | -3.07315828669768 | -1.85851747827405 |
| N                                                                                                                                  | -1.27592924939629 | 1.67937959663009  | 2.82524260754473  |
| H                                                                                                                                  | -1.57024743774715 | 2.01181466315069  | 1.88835274471757  |
| H                                                                                                                                  | -1.91454900888669 | 2.02424370992971  | 3.53604727193408  |
| H                                                                                                                                  | -0.28314779571236 | 2.07122438573896  | 2.97814839583855  |
| H                                                                                                                                  | -1.23006550981122 | 0.65317115858231  | 2.85109831393114  |
| Na                                                                                                                                 | -2.07926137176636 | -2.52284503590940 | -4.14324531982657 |
| S                                                                                                                                  | 2.19548450641196  | 1.97705792447357  | 2.14402288538720  |
| O                                                                                                                                  | 1.15376354949082  | 2.68421842666747  | 3.03759239836687  |
| O                                                                                                                                  | 1.44379797274045  | 1.18353005754524  | 1.06227693072109  |
| O                                                                                                                                  | 3.02140532336558  | 3.04823228539800  | 1.48059881188671  |
| O                                                                                                                                  | 2.99415067789717  | 1.01634294385165  | 2.96466504357475  |
| H                                                                                                                                  | 0.69552074138210  | -1.84278358854215 | -0.48382913370460 |
| S                                                                                                                                  | -0.95562830217137 | 4.19138187627838  | 0.17704650400579  |
| O                                                                                                                                  | 0.54416611337611  | 4.23669703270216  | -0.15695734120678 |
| O                                                                                                                                  | -1.15490424805017 | 4.79568203761476  | 1.52980449095370  |
| O                                                                                                                                  | -1.68332539933771 | 4.90164538957730  | -0.94890910773495 |
| O                                                                                                                                  | -1.45121326299419 | 2.73922563180012  | 0.16934917819524  |
| S                                                                                                                                  | -2.63797254721147 | 0.16961597152517  | -3.26342355285989 |
| O                                                                                                                                  | -1.53864137836184 | -0.23027679117321 | -4.28302230108379 |
| O                                                                                                                                  | -3.32610983371005 | 1.40941665795945  | -3.73688348594118 |
| O                                                                                                                                  | -1.99662598310193 | 0.44256486937980  | -1.91230223626841 |
| O                                                                                                                                  | -3.53769236670315 | -1.03911951194887 | -3.11179412789806 |
| N                                                                                                                                  | -1.40268232786026 | 2.11516861668426  | -5.76001355076498 |
| H                                                                                                                                  | -1.44935748895548 | 1.13425576267486  | -5.39506116089931 |
| H                                                                                                                                  | -0.66778854985117 | 2.20777784968813  | -6.45718820903469 |
| H                                                                                                                                  | -2.31381209969419 | 2.38823427975730  | -6.11920677901627 |
| Na <sup>+</sup> (Na <sub>2</sub> SO <sub>4</sub> ) <sub>3</sub> (NaHSO <sub>4</sub> ) <sub>3</sub> (NH <sub>3</sub> ) <sub>3</sub> |                   |                   |                   |
| Final Gibbs free energy                                                                                                            |                   | ...               | -5989.08422268 Eh |
| S                                                                                                                                  | 0.84823650146527  | 2.68172962267928  | -3.53386951423182 |
| O                                                                                                                                  | -0.57206796954592 | 3.31006664875137  | -3.49012488130415 |
| O                                                                                                                                  | 1.03606839311036  | 2.00683411284126  | -4.85643309113736 |
| O                                                                                                                                  | 0.98160554849776  | 1.63379345408831  | -2.43953982426784 |
| O                                                                                                                                  | 1.82000115345735  | 3.79710510175400  | -3.22449243377701 |
| H                                                                                                                                  | -1.34970265673903 | 2.68053324484071  | -4.92965294159749 |
| Na                                                                                                                                 | -2.25467187108308 | 2.73942052719252  | -1.97339193397780 |
| Na                                                                                                                                 | 1.24287432052825  | -0.54552673416889 | 3.72376301355513  |
| Na                                                                                                                                 | 2.41548250386774  | 2.81258029096818  | -1.00596313384483 |
| Na                                                                                                                                 | 0.73527874207466  | -0.28658235524478 | -3.77085416755585 |
| Na                                                                                                                                 | 0.21730916949933  | 5.22250602779898  | -2.25968388826212 |
| Na                                                                                                                                 | 1.38464175051467  | 4.10397477957274  | 2.55392758521808  |
| Na                                                                                                                                 | 0.01913224814357  | 0.61253410815530  | -0.61479764046075 |
| Na                                                                                                                                 | -0.30941005044770 | -3.98600281206665 | 0.43432871204631  |
| Na                                                                                                                                 | -2.53960185590304 | -1.50683659221953 | -0.59352613688373 |
| S                                                                                                                                  | -0.95904354897561 | -1.60085312467821 | 1.97580083120333  |
| O                                                                                                                                  | 0.46228833378612  | -2.16288027327170 | 1.78051741757278  |
| O                                                                                                                                  | -1.92648175282785 | -2.68835506879058 | 1.57917619417159  |
| O                                                                                                                                  | -1.20115067892485 | -0.42188563612325 | 1.02687328813470  |
| O                                                                                                                                  | -1.07189527117922 | -1.11516722178774 | 3.39170916170346  |
| S                                                                                                                                  | 0.42158268237242  | -2.67083491089221 | -2.01984354976270 |
| O                                                                                                                                  | 0.45670945143643  | -2.78099120961888 | -3.52794826780929 |
| O                                                                                                                                  | 1.29833052155301  | -3.65991598149164 | -1.29433408931766 |
| O                                                                                                                                  | 0.84006230396298  | -1.26265730637373 | -1.64796170606074 |

|                                                                                                    |                   |                   |                   |
|----------------------------------------------------------------------------------------------------|-------------------|-------------------|-------------------|
| O                                                                                                  | -1.03181152871815 | -2.93706311199423 | -1.57255364928071 |
| N                                                                                                  | -1.80295165806597 | 1.77030760573272  | 2.62057908718999  |
| H                                                                                                  | -1.42534613654987 | 2.69951900009015  | 2.32705393847095  |
| H                                                                                                  | -2.81463966130269 | 1.81168040512538  | 2.71177319603031  |
| H                                                                                                  | -1.39467393373298 | 1.46127478339194  | 3.49932289725689  |
| H                                                                                                  | -1.53885789769381 | 1.04396274609099  | 1.90959162055490  |
| Na                                                                                                 | -1.85498244042838 | -2.65382837363752 | -3.81729622567219 |
| S                                                                                                  | 2.36709941899052  | 1.39432468654359  | 1.84363895659426  |
| O                                                                                                  | 1.04902542516886  | 1.61412607929860  | 2.60092207899055  |
| O                                                                                                  | 2.08123881240311  | 0.99708304615505  | 0.38600375241120  |
| O                                                                                                  | 3.12130907419840  | 2.69858460730008  | 1.81923826151421  |
| O                                                                                                  | 3.09244079545584  | 0.25377130153802  | 2.51282828255440  |
| N                                                                                                  | 2.79026773421684  | -1.69255392998447 | 0.34762029448394  |
| H                                                                                                  | 2.71668814147731  | -0.68814644374262 | 0.08998266106275  |
| H                                                                                                  | 3.61727386835662  | -1.83011875984685 | 0.92224349883072  |
| H                                                                                                  | 2.74806814882307  | -2.31252167475866 | -0.46744850309357 |
| H                                                                                                  | 1.92523082016641  | -1.86591990899029 | 0.90343916810806  |
| S                                                                                                  | -0.64425943964394 | 3.99892790627398  | 0.20563485657300  |
| O                                                                                                  | 0.81978366402579  | 4.25873135281562  | -0.16058705425947 |
| O                                                                                                  | -0.81649439018860 | 4.29357617034109  | 1.68983586173722  |
| O                                                                                                  | -1.50232499788892 | 4.86169912249396  | -0.69136374117124 |
| O                                                                                                  | -1.02431155009001 | 2.55450899326843  | -0.03422388205311 |
| S                                                                                                  | -2.63957059331381 | 0.05663708099676  | -3.14246639237410 |
| O                                                                                                  | -1.57372415815389 | -0.28662584885915 | -4.21781233034076 |
| O                                                                                                  | -3.41610958248923 | 1.25571504690184  | -3.59520981755566 |
| O                                                                                                  | -1.94941158602900 | 0.40085087222921  | -1.83263380936331 |
| O                                                                                                  | -3.45282129956339 | -1.19745507715220 | -2.92104308874411 |
| N                                                                                                  | -1.67536483137931 | 2.05237935102566  | -5.70642125030930 |
| H                                                                                                  | -1.60600550595344 | 1.08322390327040  | -5.30555186848506 |
| H                                                                                                  | -1.05045630457367 | 2.16635978003989  | -6.50077734093248 |
| H                                                                                                  | -2.64678849457733 | 2.23589658819771  | -5.94527073573040 |
| Na <sup>+</sup> (Na <sub>2</sub> SO <sub>4</sub> ) <sub>3</sub> (NaHSO <sub>4</sub> ) <sub>4</sub> |                   |                   |                   |
| Final Gibbs free energy ... -6681.46640314 Eh                                                      |                   |                   |                   |
| S                                                                                                  | 3.26823555224332  | 1.28555006610366  | -2.45683996761824 |
| O                                                                                                  | 4.21919856187519  | 0.69633920867920  | -3.67649350843020 |
| O                                                                                                  | 3.69321399615445  | 0.53820854613306  | -1.23673496438821 |
| O                                                                                                  | 3.54992903256542  | 2.73686274215465  | -2.36395979500369 |
| O                                                                                                  | 1.91649588317264  | 0.92396705965150  | -2.95049439181053 |
| H                                                                                                  | 5.01724106175382  | 1.24442483993623  | -3.75045770163353 |
| S                                                                                                  | -2.69530624344652 | -0.60731054500340 | 0.09887429948696  |
| O                                                                                                  | -4.18373121334633 | -0.11862953328884 | 0.57686075245202  |
| O                                                                                                  | -2.90234240011101 | -1.71634443188367 | -0.85684840714749 |
| O                                                                                                  | -2.13136944721595 | 0.65286369191663  | -0.45277562698330 |
| O                                                                                                  | -1.96633618456209 | -1.01044062101559 | 1.34595899221690  |
| H                                                                                                  | -4.70491233054248 | -0.90105803052659 | 0.82187789327172  |
| S                                                                                                  | 0.52346058218584  | -4.42206611897701 | -4.43874358612753 |
| O                                                                                                  | 0.46943510368163  | -5.42207811535281 | -5.73576356609569 |
| O                                                                                                  | 1.34374508755882  | -5.12001279730527 | -3.41005959344187 |
| O                                                                                                  | 1.15975292519957  | -3.21966984366141 | -5.02447361911780 |
| O                                                                                                  | -0.88821338447301 | -4.22244963755432 | -4.00608185147550 |
| H                                                                                                  | 0.07435042466008  | -6.26334365030519 | -5.45537423151741 |
| S                                                                                                  | 1.69765761142484  | -0.26040781936754 | 3.81305765371238  |
| O                                                                                                  | 3.20747357556332  | -0.05886166595622 | 3.23365482258434  |
| O                                                                                                  | 0.81328329693949  | -0.23775190583679 | 2.58746694515191  |

|                                                                                                                       |                   |                   |                   |
|-----------------------------------------------------------------------------------------------------------------------|-------------------|-------------------|-------------------|
| O                                                                                                                     | 1.64176808504124  | -1.56124086813407 | 4.51753436681714  |
| O                                                                                                                     | 1.50841990523504  | 0.92774586031290  | 4.67080754313057  |
| H                                                                                                                     | 3.42150879300108  | -0.79987144889082 | 2.55651557436982  |
| Na                                                                                                                    | 2.05796802975449  | 2.85837993707175  | 3.66228454281634  |
| Na                                                                                                                    | -0.87825891895684 | 1.17370748366521  | 1.71587818183892  |
| Na                                                                                                                    | -0.18343971770407 | 0.97608887397446  | -1.68031637970017 |
| Na                                                                                                                    | 1.97153958873704  | -4.52100225868533 | -1.34971555393781 |
| Na                                                                                                                    | 3.28916638844091  | 4.14161475402262  | -0.60210951404958 |
| Na                                                                                                                    | 4.05438472185333  | -1.75058167720723 | -1.00670500173494 |
| Na                                                                                                                    | 1.57215541540557  | -1.19814666646912 | -4.21966779554506 |
| Na                                                                                                                    | -1.79236945945872 | -2.94321531368343 | -2.42237580894951 |
| Na                                                                                                                    | 2.38625295670186  | 0.47142802860112  | 0.75741365421108  |
| Na                                                                                                                    | 2.58845157921753  | -3.55239048514398 | 4.14271599635890  |
| Na                                                                                                                    | 0.06316548221915  | -2.15267503913285 | 1.38574927281573  |
| S                                                                                                                     | 1.15437140763518  | 3.19212912676111  | 0.94332853813103  |
| O                                                                                                                     | 1.16559759276724  | 4.44839983540188  | 0.14280497682652  |
| O                                                                                                                     | 0.65917849067610  | 2.00781560894256  | 0.12012501474713  |
| O                                                                                                                     | 2.61429186406494  | 2.85813525131676  | 1.35208411018735  |
| O                                                                                                                     | 0.32147985274078  | 3.25135749196331  | 2.20483189224972  |
| S                                                                                                                     | 3.32087752885898  | -3.17159451515484 | 1.43944116477445  |
| O                                                                                                                     | 4.20997923836512  | -3.64931377881607 | 2.53739328756241  |
| O                                                                                                                     | 3.61428882030328  | -3.79274885692064 | 0.09371476411840  |
| O                                                                                                                     | 1.87720739925763  | -3.42510124813870 | 1.84917772511587  |
| O                                                                                                                     | 3.52905414128819  | -1.64207520953412 | 1.24199455616918  |
| S                                                                                                                     | 0.74892938459568  | -1.82246379156927 | -1.50412013913002 |
| O                                                                                                                     | 0.11958657796749  | -3.08259592744590 | -0.94171066833119 |
| O                                                                                                                     | -0.13618663235185 | -1.24335016421052 | -2.59898221644717 |
| O                                                                                                                     | 0.87298933008062  | -0.80570343149496 | -0.39775300004678 |
| O                                                                                                                     | 2.10263747098025  | -2.16066102794018 | -2.10464980545382 |
| Na <sup>+</sup> (Na <sub>2</sub> SO <sub>4</sub> ) <sub>3</sub> (NaHSO <sub>4</sub> ) <sub>4</sub> (NH <sub>3</sub> ) |                   |                   |                   |
| Final Gibbs free energy                                                                                               |                   | ...               | -6738.00717732 Eh |
| S                                                                                                                     | -2.00485388056791 | -2.16435519163961 | -2.94665345172359 |
| O                                                                                                                     | -2.38058260120325 | -2.86202422327581 | -4.38902064532439 |
| O                                                                                                                     | -0.55483706042870 | -2.43562581682640 | -2.85715221195123 |
| O                                                                                                                     | -2.81882108495527 | -2.85002042595567 | -1.89502474789241 |
| O                                                                                                                     | -2.39360254737048 | -0.72733135007743 | -3.06384667260342 |
| H                                                                                                                     | -3.28395328898062 | -2.60757638752288 | -4.63759896408719 |
| S                                                                                                                     | 4.44097990341130  | -2.42260234223466 | -4.05425057540437 |
| O                                                                                                                     | 4.66253977068120  | -3.58617648403420 | -5.17467294229645 |
| O                                                                                                                     | 3.04157244389314  | -2.67507216540818 | -3.61463475301945 |
| O                                                                                                                     | 5.41289563013793  | -2.70194023427637 | -2.94408087544344 |
| O                                                                                                                     | 4.67819589008027  | -1.12318141243786 | -4.72128913796623 |
| H                                                                                                                     | 5.54642460890955  | -3.48343469757138 | -5.56669912807559 |
| S                                                                                                                     | 2.27115961528615  | -2.18134830088403 | 1.22770198080237  |
| O                                                                                                                     | 3.72989292635995  | -2.61765780113769 | 1.18098794204708  |
| O                                                                                                                     | 1.71964899646815  | -2.37453020067463 | -0.20698910149891 |
| O                                                                                                                     | 1.43524210476857  | -2.90640994424384 | 2.20289226271865  |
| O                                                                                                                     | 2.29037575121696  | -0.65954106724703 | 1.50260596581860  |
| Na                                                                                                                    | 0.74042702047035  | 1.00258324683334  | 1.87683135789099  |
| Na                                                                                                                    | 1.12869554801253  | -1.52278409786375 | -4.16817724668324 |
| Na                                                                                                                    | 1.64684917566115  | -0.14801504161206 | -0.79366706749619 |
| Na                                                                                                                    | -1.17922225083185 | 1.04996134460767  | -2.13915207938132 |
| Na                                                                                                                    | -4.03886574481103 | -1.16851766131349 | -0.76029263395163 |
| Na                                                                                                                    | 3.41405302816290  | 2.92803097376627  | -1.42864171502012 |

|                                                                                                                                    |                   |                   |                   |
|------------------------------------------------------------------------------------------------------------------------------------|-------------------|-------------------|-------------------|
| Na                                                                                                                                 | -1.93836472383122 | 3.00308215041002  | 0.80635895883646  |
| Na                                                                                                                                 | 4.60438798773202  | -0.54949476117774 | 1.59753077867538  |
| Na                                                                                                                                 | 4.01412118058600  | 1.01685548610658  | -4.40869434184586 |
| Na                                                                                                                                 | 0.55698814966361  | 4.08505316735762  | -2.93923329509142 |
| Na                                                                                                                                 | 3.74299246686786  | -2.92206939743697 | -1.19666287387177 |
| S                                                                                                                                  | -1.87911480459755 | 0.13566721250484  | 0.67982250069450  |
| O                                                                                                                                  | -1.58205635425642 | 0.97455231469876  | 1.90095179734802  |
| O                                                                                                                                  | -2.78583006944595 | 0.94532229587647  | -0.25925014329393 |
| O                                                                                                                                  | -2.59138556489309 | -1.15693019939176 | 1.02310488953384  |
| O                                                                                                                                  | -0.58035340911109 | -0.17159389210473 | -0.03723423851627 |
| S                                                                                                                                  | 5.13125127098551  | 0.37670068742945  | -1.34587327537696 |
| O                                                                                                                                  | 3.94229117866459  | -0.53522540377883 | -1.41542814111826 |
| O                                                                                                                                  | 6.41589850948873  | -0.51366872450233 | -1.71842638740138 |
| O                                                                                                                                  | 5.03068495349245  | 1.48730575186691  | -2.34567144252457 |
| O                                                                                                                                  | 5.38880646999696  | 0.89402031718558  | 0.02205954490658  |
| S                                                                                                                                  | 1.21631079082143  | 1.43337186764990  | -3.89463484400726 |
| O                                                                                                                                  | 1.76525394382565  | 0.69860924749544  | -5.09134602904389 |
| O                                                                                                                                  | 2.28403482511469  | 2.42040894715445  | -3.39999238500389 |
| O                                                                                                                                  | -0.05192796096618 | 2.20343047481189  | -4.14609473396061 |
| O                                                                                                                                  | 0.93202503587495  | 0.37931193351706  | -2.82854570086377 |
| S                                                                                                                                  | 0.80793513159853  | 3.25928974959514  | -0.16606826803139 |
| O                                                                                                                                  | -0.41308826654664 | 2.98851563947630  | -1.06091623330637 |
| O                                                                                                                                  | 1.70904381992104  | 2.02837609628853  | -0.07133004072882 |
| O                                                                                                                                  | 0.29903862041055  | 3.57550159784417  | 1.21119139387065  |
| O                                                                                                                                  | 1.61185471753032  | 4.35574829439731  | -0.83271887157379 |
| N                                                                                                                                  | -0.82025927515948 | -3.27997028401463 | 0.35922418355045  |
| H                                                                                                                                  | -1.45533749922530 | -2.51167618547794 | 0.66025733225911  |
| H                                                                                                                                  | -0.51309771433400 | -3.81538902832079 | 1.17175525233680  |
| H                                                                                                                                  | 0.05113777058424  | -2.86448160295637 | -0.05259441101383 |
| H                                                                                                                                  | -1.30484832955492 | -3.85027267100545 | -0.33251675236802 |
| H                                                                                                                                  | 6.12563942680936  | -1.29552788553901 | -2.26985649558185 |
| Na <sup>+</sup> (Na <sub>2</sub> SO <sub>4</sub> ) <sub>3</sub> (NaHSO <sub>4</sub> ) <sub>4</sub> (NH <sub>3</sub> ) <sub>2</sub> |                   |                   |                   |
| Final Gibbs free energy                                                                                                            |                   | ...               | -6794.54994755 Eh |
| S                                                                                                                                  | -2.03216913162667 | -2.15729790615622 | -2.93259450317865 |
| O                                                                                                                                  | -2.44952057715896 | -2.83875373083149 | -4.37262267844328 |
| O                                                                                                                                  | -0.58655317572109 | -2.46021509218106 | -2.87026745936411 |
| O                                                                                                                                  | -2.83393482929594 | -2.84065924971036 | -1.87043646553905 |
| O                                                                                                                                  | -2.39800436822492 | -0.71460683669513 | -3.03616374495950 |
| H                                                                                                                                  | -3.34394375550065 | -2.54565281965618 | -4.61008678011287 |
| S                                                                                                                                  | 4.49613088143662  | -2.68561673911838 | -4.38725704408556 |
| O                                                                                                                                  | 4.94460005911782  | -3.83262622605478 | -5.46519514423012 |
| O                                                                                                                                  | 3.02643514859988  | -2.54668752225307 | -4.48769283896525 |
| O                                                                                                                                  | 5.00791406472454  | -3.24510255655210 | -3.11620756859237 |
| O                                                                                                                                  | 5.21898737713392  | -1.42815189387691 | -4.79127671699595 |
| H                                                                                                                                  | 4.57236010501330  | -3.60655085211822 | -6.33379506316847 |
| S                                                                                                                                  | 2.39282914491363  | -2.07282590174562 | 1.22815365048956  |
| O                                                                                                                                  | 3.84731139188008  | -2.51407010478304 | 1.23133705138687  |
| O                                                                                                                                  | 1.87652758585518  | -2.29215705088767 | -0.21719375057150 |
| O                                                                                                                                  | 1.52075726162422  | -2.76379075488051 | 2.19842208505621  |
| O                                                                                                                                  | 2.41603129879506  | -0.54484821717506 | 1.45993015223038  |
| H                                                                                                                                  | 6.70285993224291  | -1.36621820566546 | -3.76061217731050 |
| Na                                                                                                                                 | 0.73626282879056  | 0.91264193474615  | 1.95389968186931  |
| Na                                                                                                                                 | 1.07565838911659  | -1.47474703806994 | -4.13586169555631 |
| Na                                                                                                                                 | 1.68118824445347  | -0.03017568679836 | -0.78543523343194 |

|                                                                          |                   |                       |                   |
|--------------------------------------------------------------------------|-------------------|-----------------------|-------------------|
| Na                                                                       | -1.21923023481561 | 1.09481653226164      | -2.08746089477806 |
| Na                                                                       | -4.01946099279746 | -1.21204127249977     | -0.67880602742213 |
| Na                                                                       | 3.30717065297612  | 2.87723852449974      | -1.15050086497598 |
| Na                                                                       | -2.06076182001853 | 2.97302655002908      | 0.85246228314419  |
| Na                                                                       | 4.77399100888304  | -0.40988776686910     | 1.36210378723593  |
| Na                                                                       | 4.06115033627308  | 0.56825719123040      | -4.23732928619148 |
| Na                                                                       | 0.62027302911999  | 4.11374697095132      | -2.89209968042396 |
| Na                                                                       | 4.04180222473961  | -2.65129752496630     | -1.11807213523489 |
| S                                                                        | -1.86374731192574 | 0.09896502473532      | 0.71725203213405  |
| O                                                                        | -1.57356266503112 | 0.94931391807496      | 1.93304515054918  |
| O                                                                        | -2.80952747394922 | 0.88549409504768      | -0.20574000527187 |
| O                                                                        | -2.53460369278011 | -1.21212869046917     | 1.07211832656316  |
| O                                                                        | -0.57125077131460 | -0.17771355488639     | -0.02046780592149 |
| S                                                                        | 5.00346652279307  | 0.24677830317882      | -1.46233200180800 |
| O                                                                        | 3.72121982571764  | -0.38176620897518     | -1.99273996544665 |
| O                                                                        | 5.84911128544169  | -0.88308490735424     | -0.84436957683586 |
| O                                                                        | 5.73214614388185  | 0.91303894574857      | -2.59282196730822 |
| O                                                                        | 4.67358711351839  | 1.21918588927270      | -0.34902073492142 |
| S                                                                        | 1.29674087654232  | 1.44558137813315      | -3.82192395595296 |
| O                                                                        | 1.87100085077233  | 0.67315601864116      | -4.98673444003442 |
| O                                                                        | 2.39552023437592  | 2.32596710658129      | -3.21839399611458 |
| O                                                                        | 0.12165416573509  | 2.31425476259422      | -4.17980608854487 |
| O                                                                        | 0.82686245705074  | 0.40816793474573      | -2.80320140396010 |
| S                                                                        | 0.64285954779016  | 3.36866609544684      | -0.09355081486186 |
| O                                                                        | -0.53000173066593 | 3.06994839419354      | -1.04474696794887 |
| O                                                                        | 1.49516985625366  | 2.11798257223768      | 0.11233665536906  |
| O                                                                        | 0.07329595742207  | 3.79823810547373      | 1.22237568539084  |
| O                                                                        | 1.52454067836281  | 4.39847848217131      | -0.77480232611294 |
| N                                                                        | -0.66206448456884 | -3.24903210240423     | 0.29859855538391  |
| H                                                                        | -1.31505084530385 | -2.51055690057356     | 0.62904768435804  |
| H                                                                        | -0.37423440333367 | -3.82906176404572     | 1.08635913473941  |
| H                                                                        | 0.21747688865031  | -2.80479380296801     | -0.06744656883463 |
| H                                                                        | -1.12454570749085 | -3.78329069866647     | -0.43613318093170 |
| N                                                                        | 7.42323360665174  | -1.40863893622532     | -3.00653232574796 |
| H                                                                        | 7.91787433128327  | -2.29644752781767     | -3.05333569206623 |
| H                                                                        | 6.89941602275800  | -1.30668053104818     | -2.08942354168705 |
| H                                                                        | 8.06768620532499  | -0.62744567321382     | -3.10452631678749 |
| $\text{Na}^+(\text{Na}_2\text{SO}_4)_3(\text{NaHSO}_4)_4(\text{NH}_3)_3$ |                   |                       |                   |
| Final Gibbs free energy                                                  |                   | ... -6851.08489760 Eh |                   |
| S                                                                        | -2.04346691229696 | -1.55631595037049     | -2.92797095635296 |
| O                                                                        | -2.36601291582506 | -2.09893822081529     | -4.45156428991489 |
| O                                                                        | -0.72125051019286 | -2.13874560568000     | -2.56729563337759 |
| O                                                                        | -3.13919349389686 | -2.03463364303904     | -2.04640773809339 |
| O                                                                        | -2.04703639102118 | -0.08707519605711     | -3.15285866718374 |
| H                                                                        | -2.24474145285635 | -3.06304992808787     | -4.47089410572356 |
| S                                                                        | 3.25933674930795  | -2.07909672933419     | -4.87690014941897 |
| O                                                                        | 3.22746932334984  | -2.98309814217851     | -6.01755869930586 |
| O                                                                        | 2.14518691754298  | -1.03806357683345     | -4.86313006052036 |
| O                                                                        | 3.31000850581988  | -2.74261912979776     | -3.52631200866270 |
| O                                                                        | 4.55947974621696  | -1.11770924939067     | -4.97958015761181 |
| H                                                                        | -0.84010241759208 | 0.18869451256565      | -4.79569080053577 |
| S                                                                        | 2.32911447619815  | -2.00074853412851     | 0.95891011802595  |
| O                                                                        | 3.75268101878644  | -2.51164197586989     | 0.91216766827669  |
| O                                                                        | 1.81059592840159  | -1.91561504862086     | -0.47678558752560 |

|                                                                                                                                    |                   |                   |                   |
|------------------------------------------------------------------------------------------------------------------------------------|-------------------|-------------------|-------------------|
| O                                                                                                                                  | 1.41216144948325  | -2.84782208343457 | 1.78331104940977  |
| O                                                                                                                                  | 2.39343241622602  | -0.57072058552512 | 1.52676599843751  |
| H                                                                                                                                  | 5.42511913035840  | -1.45538098790034 | -4.44397155684834 |
| Na                                                                                                                                 | 0.65368988019998  | 0.65701796431340  | 2.38071737450805  |
| Na                                                                                                                                 | 1.45906833679547  | -1.28352915460722 | -2.66299321474628 |
| Na                                                                                                                                 | 1.78500679450343  | 0.57805669059345  | -0.43728608513282 |
| Na                                                                                                                                 | -1.29183458525694 | 1.54645281472735  | -1.54368058344792 |
| Na                                                                                                                                 | -4.19077154068341 | -0.79909212473363 | -0.50193502941266 |
| Na                                                                                                                                 | 3.21354052745549  | 3.37070154274057  | -0.32283115605680 |
| Na                                                                                                                                 | -2.17392269753482 | 2.94560216108134  | 1.69155402213724  |
| Na                                                                                                                                 | 4.77103117109087  | -0.41978970762100 | 1.23729628965064  |
| Na                                                                                                                                 | 3.66819758588857  | 0.92603406657195  | -4.22827134748808 |
| Na                                                                                                                                 | 0.33087150162073  | 4.73809929420874  | -1.70347410375541 |
| Na                                                                                                                                 | 4.05095161680556  | -2.36717255153722 | -1.42556448704951 |
| S                                                                                                                                  | -1.95476487370683 | 0.11838979999839  | 1.00886122076493  |
| O                                                                                                                                  | -1.67566167362256 | 0.77711335452422  | 2.33952981355397  |
| O                                                                                                                                  | -2.87863748894645 | 1.04264295111456  | 0.18799904909622  |
| O                                                                                                                                  | -2.67591511839016 | -1.20518962916102 | 1.16927876961167  |
| O                                                                                                                                  | -0.65332148526352 | -0.07408163598462 | 0.26158452037878  |
| S                                                                                                                                  | 4.72626603393275  | 0.56710764301710  | -1.48956632660125 |
| O                                                                                                                                  | 3.44406348156244  | -0.04747081259511 | -2.05558020292332 |
| O                                                                                                                                  | 5.59716142064847  | -0.58252745497319 | -0.98699574425797 |
| O                                                                                                                                  | 5.37694275252584  | 1.38220611693209  | -2.55154416251546 |
| O                                                                                                                                  | 4.33402840708510  | 1.39223262944402  | -0.25979770050539 |
| S                                                                                                                                  | 1.05552494657391  | 2.33025041970199  | -3.11473618504004 |
| O                                                                                                                                  | 1.64951543420846  | 2.09879724641996  | -4.48895762054870 |
| O                                                                                                                                  | 2.02132212650853  | 3.12477313546365  | -2.26227843861186 |
| O                                                                                                                                  | -0.25662251600253 | 3.08186212061939  | -3.20796497281884 |
| O                                                                                                                                  | 0.76213543461977  | 0.98129927768546  | -2.46489139911442 |
| S                                                                                                                                  | 0.52667723654588  | 3.55418354895400  | 0.92141244886787  |
| O                                                                                                                                  | -0.62037427478883 | 3.30003918426008  | -0.07901203871106 |
| O                                                                                                                                  | 1.44936841398598  | 2.33554702805264  | 0.97276598765090  |
| O                                                                                                                                  | -0.08582231979339 | 3.77851673924156  | 2.26654273649391  |
| O                                                                                                                                  | 1.34567292632792  | 4.71232802891743  | 0.39007751148281  |
| N                                                                                                                                  | -0.84611309537620 | -3.17410546813476 | 0.31414212445858  |
| H                                                                                                                                  | -1.57768390887092 | -2.53295910912775 | 0.68397875952221  |
| H                                                                                                                                  | 0.01855010650153  | -3.10961241942254 | 0.92357841736120  |
| H                                                                                                                                  | -0.59919075900753 | -2.84944506215350 | -0.62816744524709 |
| H                                                                                                                                  | -1.19086999271715 | -4.12887071426104 | 0.27309071927106  |
| N                                                                                                                                  | 6.73597336444125  | -1.64650287212857 | -3.70205504597154 |
| H                                                                                                                                  | 7.07798700944416  | -2.60163886823938 | -3.66639886605562 |
| H                                                                                                                                  | 6.65716984085268  | -1.29142889634766 | -2.74722012167324 |
| H                                                                                                                                  | 7.45065813457237  | -1.09274270214422 | -4.16489198304090 |
| N                                                                                                                                  | -0.13046967120627 | 0.28772036111656  | -5.53578583901261 |
| H                                                                                                                                  | 0.52269909706280  | -0.51883459307120 | -5.51795854772825 |
| H                                                                                                                                  | 0.47801254117707  | 1.11657915541747  | -5.30350991788121 |
| H                                                                                                                                  | -0.57880591638677 | 0.37950386370730  | -6.44313905328098 |
| Na <sup>+</sup> (Na <sub>2</sub> SO <sub>4</sub> ) <sub>3</sub> (NaHSO <sub>4</sub> ) <sub>4</sub> (NH <sub>3</sub> ) <sub>4</sub> |                   |                   |                   |
| Final Gibbs free energy ... -6907.62303148 Eh                                                                                      |                   |                   |                   |
| S                                                                                                                                  | -1.39320881375641 | -2.34052044458407 | -3.38058421877332 |
| O                                                                                                                                  | -1.14547963313519 | -2.80670542043794 | -4.79027417444755 |
| O                                                                                                                                  | -0.38977821489857 | -3.05156403088278 | -2.46657305575480 |
| O                                                                                                                                  | -2.79257536240099 | -2.56407745526927 | -2.91646326939609 |
| O                                                                                                                                  | -1.06430891389110 | -0.82664318128144 | -3.31817921039840 |

|    |                   |                   |                   |
|----|-------------------|-------------------|-------------------|
| H  | -0.64200960529309 | -0.33553135580995 | -4.72418119637849 |
| S  | 3.54416856206094  | -3.07268915711258 | -4.07696059064459 |
| O  | 3.05142374103498  | -4.25267833029191 | -4.84271989810231 |
| O  | 2.33166169500778  | -2.18642603038193 | -3.74497438958968 |
| O  | 4.29424284731979  | -3.46434373374863 | -2.83145196647056 |
| O  | 4.49504143481365  | -2.18903190202136 | -4.92280222723168 |
| S  | 2.65736336971903  | -1.17726826778580 | 1.17048061962940  |
| O  | 4.08531626038228  | -1.65927836457693 | 1.37208523891656  |
| O  | 2.11986305006307  | -1.93797075406319 | -0.05741587371704 |
| O  | 1.73094641718513  | -1.37338301336518 | 2.31602414786629  |
| O  | 2.75103195759558  | 0.32245472052655  | 0.86059606749067  |
| H  | 5.83295194970133  | -2.12914578066975 | -4.25746475256080 |
| Na | 0.59504112086317  | 0.87005917792702  | 1.74680211676162  |
| Na | 0.82057291038813  | -3.95721946421063 | -4.34302224958814 |
| Na | 1.10738410514662  | -1.19664682077351 | -1.97931229883141 |
| Na | -1.05554251115673 | 1.18068471826486  | -2.06533272982207 |
| Na | -3.76157051333820 | -1.52438261415794 | -1.23668185055571 |
| Na | 2.54980155307011  | 1.78054958252576  | -0.87814267480643 |
| Na | -2.58417210109452 | 2.63891700316261  | 0.73610161931682  |
| Na | 5.13952602110613  | 0.34342212012937  | 0.95530537987533  |
| Na | 3.46635868263821  | -0.19010027898720 | -4.36643138279304 |
| Na | 0.08500397284843  | 4.48630615551994  | -2.62974532592692 |
| Na | 4.23831342663398  | -2.33999395212260 | -0.92873173647716 |
| S  | -1.86648883048494 | -0.18097277616489 | 0.41562025517162  |
| O  | -1.77629841577276 | 0.64186202102274  | 1.67228264594296  |
| O  | -2.81720969153241 | 0.52434124436032  | -0.57033425414616 |
| O  | -2.43134246003889 | -1.56894369021179 | 0.66371070549449  |
| O  | -0.48780888564746 | -0.28806717493146 | -0.20918981484412 |
| S  | 5.10685020032960  | 0.44848229013316  | -1.93353298418918 |
| O  | 3.73420734253407  | -0.17197192694629 | -2.05255770490518 |
| O  | 6.03800706264721  | -0.57157318010259 | -1.29332776444050 |
| O  | 5.58533151535361  | 0.82503669856427  | -3.33286065625005 |
| O  | 5.02337870137231  | 1.68155037083645  | -1.05027038938410 |
| S  | 1.32861569940316  | 2.07479311312255  | -3.74410487779691 |
| O  | 2.02101714324761  | 1.49029805336798  | -4.95986125808436 |
| O  | 2.15161498713312  | 3.23664651882623  | -3.17276230567190 |
| O  | -0.04936774925017 | 2.58395418876876  | -4.08397502159116 |
| O  | 1.21298075314033  | 1.01698123229737  | -2.66838813503919 |
| S  | -0.05182774501378 | 3.76423395740631  | 0.10407915813784  |
| O  | -0.99899333974813 | 3.17518204262528  | -0.99169822382448 |
| O  | 0.99415927910879  | 2.70972575770103  | 0.43476790575471  |
| O  | -0.89570171795577 | 4.04044007538625  | 1.31045759331085  |
| O  | 0.60286880986624  | 4.97460487932271  | -0.49388056458522 |
| N  | -0.28136863107387 | -3.29192067745483 | 0.35248739723670  |
| H  | -1.06556842819608 | -2.69008371460911 | 0.68818045185842  |
| H  | -0.22884468274151 | -4.15972871345173 | 0.87756901296914  |
| H  | 0.62131549211783  | -2.76666034032546 | 0.41791532112456  |
| H  | -0.45337809899233 | -3.45739223266109 | -0.65630983400746 |
| N  | 6.79496675703630  | -2.09233413622021 | -3.71150871160973 |
| H  | 7.08662382758170  | -3.04842230059210 | -3.52143189201700 |
| H  | 6.65190855972193  | -1.59000280776604 | -2.81777971235379 |
| H  | 7.50794374507113  | -1.61262870912604 | -4.25464737279655 |
| N  | -0.33121071447184 | -0.06052262033710 | -5.72914662486386 |
| H  | -1.00726805044749 | 0.57768801512381  | -6.14105904482797 |

|   |                   |                   |                   |
|---|-------------------|-------------------|-------------------|
| H | -0.29381662911608 | -0.92722302010683 | -6.26346019148838 |
| H | 0.58676024607936  | 0.41473272024242  | -5.68284097685485 |
| N | 4.82353368560810  | 3.45100100848851  | -3.46642438751671 |
| H | 5.15548104082266  | 3.82945566445571  | -2.58047801686753 |
| H | 5.20503040651554  | 2.46785581088937  | -3.53826474008550 |
| H | 3.76074517536375  | 3.39582944334280  | -3.43788467339383 |
| H | 5.13817989229532  | 4.03407044268724  | -4.23751903781305 |
